# Supplementary material
Source: PubMed Central journal article supplement (PMC4108080)
Supplement: NIHMS234976-supplement-01.pdf [file NIHMS234976-supplement-01.pdf]

**Inventory of Supplementary Figures and Tables**

Figure S1 Characteristics of the long ncRNA transcripts. Related to Figure 1.

Figure S2 Annotated long ncRNAs are independent transcripts. Related to Figure 2.

Figure S3 Characterization of the analyzed ncRNA-activators. Related to Figure 3.

Figure S4 ChIP analysis of the analyzed ncRNA-a loci. Related to Figure 4.

Table S1 Annotation and genomic coordinates for the identified 3,019 long ncRNAs from the GENCODE annotation. Related to Figure 1.

Table S2 qPCR validation of the custom microarray expression data for the 1 percent ENCODE region for HeLa cells, human primary keratinocytes and HEK-293 cells. Related to Figure 2.

Table S3 99 ncRNAs with a fold change  $>|1.5|$  in keratinocytes after induction of differentiation with TPA treatment using customized expression array. Related to Figure 2.

Table S4 Expression data for knock-down analyses of ncRNA-a loci. Related to Figure 3.

Table S5 ID of the long ncRNAs tested in knock-down experiments. Related to Figure 4.

Table S6 Microarray results from Snai1 and ncRNA-a7 knock-down in A549 cells. Related to Figure 5.

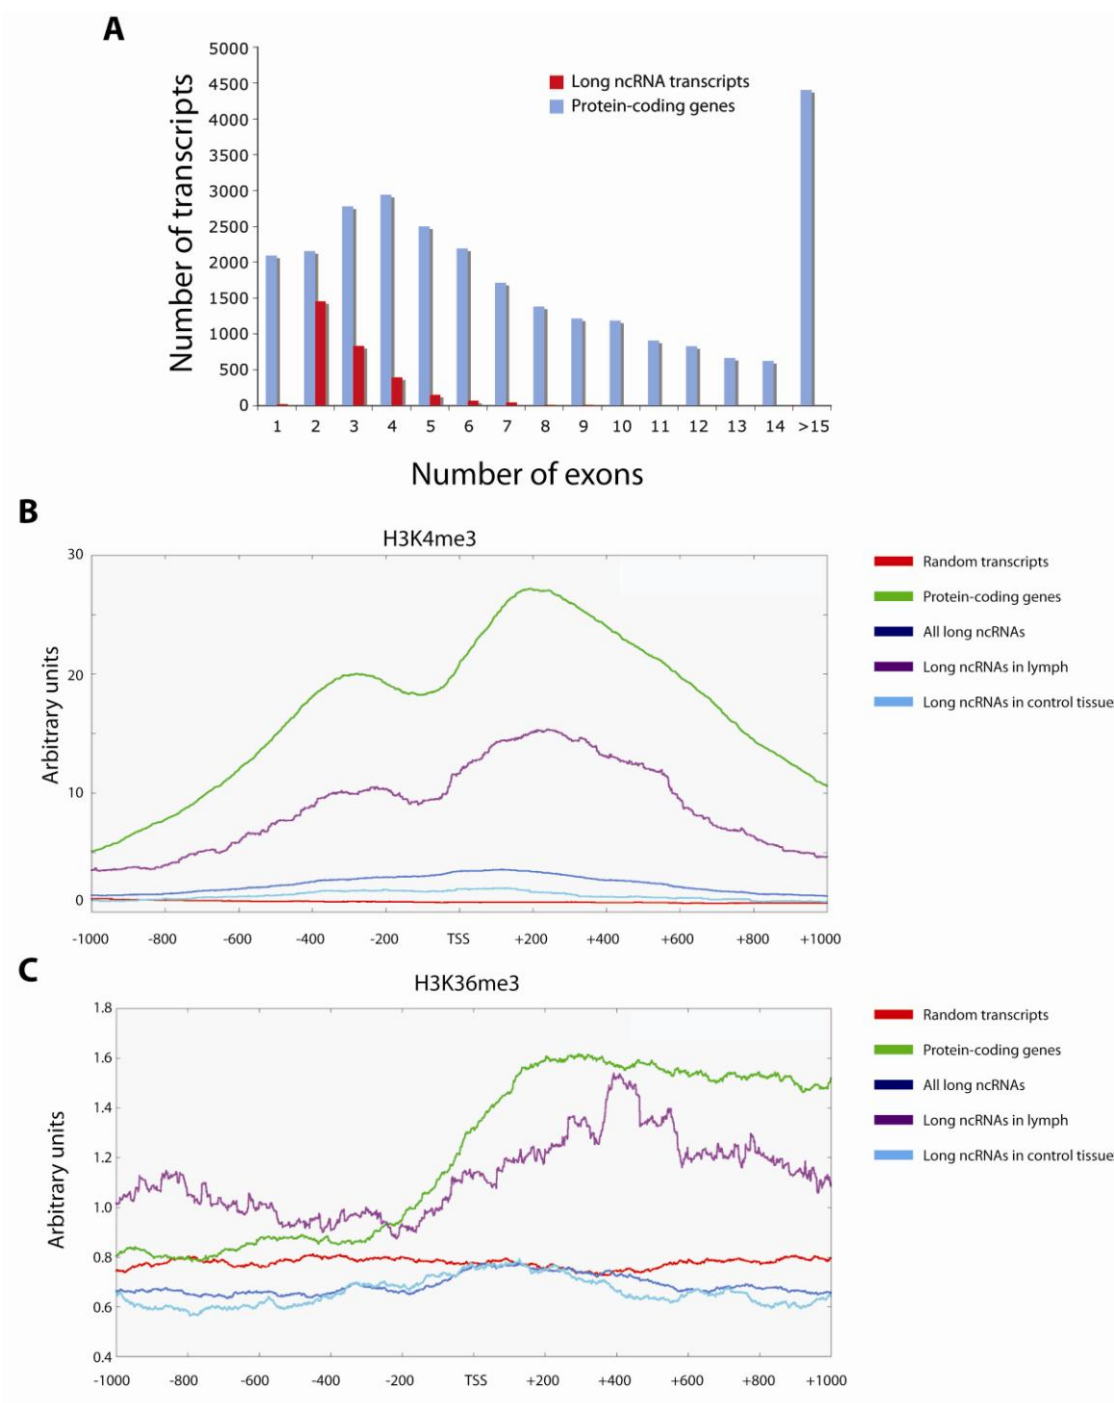

Figure S1. Characteristics of the long ncRNA transcripts. Related to Figure 1.

(A) Number of exons for the entire transcript and the corresponding number of transcripts shown for all 3,019 long ncRNAs and all protein-coding genes.

(B and C) Analysis of histone marks H3K4 (B) or H3K36 (C) trimethylation from -1,000 to +1,000 from the TSS of the 3,019 long ncRNAs for the various sets shown in the legend. Data are extracted from publicly available databases (Barski et al., 2007).

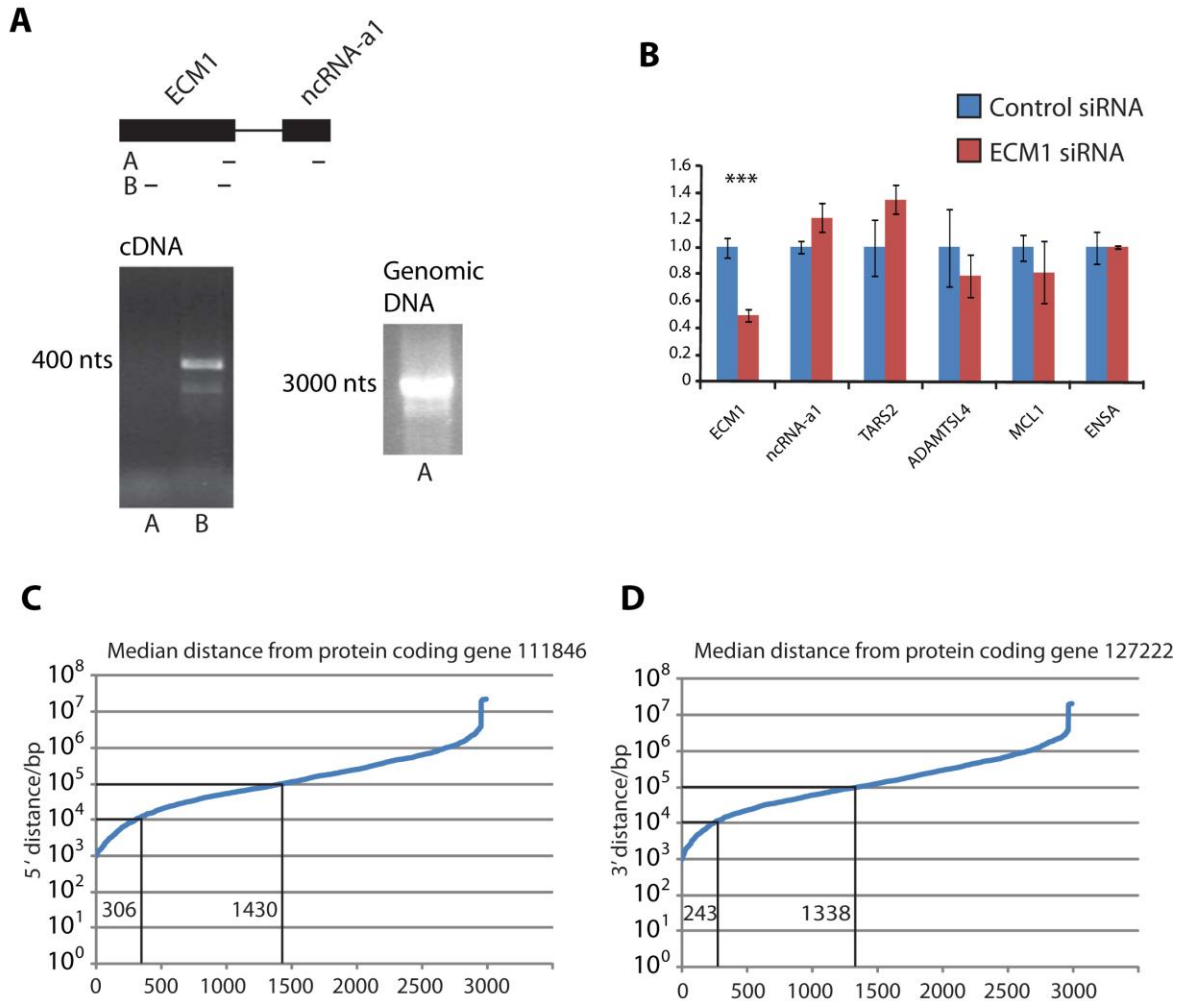

Figure S2. Annotated long ncRNAs are independent transcripts. Related to Figure 2.

(A) PCR amplification using the primer pairs shown in the upper panel on cDNA from HEK293 cells (left panel) or human genomic DNA (right panel).

(B) Analysis of the ECM1 locus upon siRNA knock-down of ECM1 using qPCR. y-axis show RNA level compared to Gapdh and normalized to control siRNA values set to an average of 1.

(C and D) Plot showing the distance of the long ncRNAs from its nearest protein coding gene at the 5' end (C) and the 3' end (D). Y-axes show the distance in bp on a logarithmic scale. Numbers on X-axes represent the 3,019 long ncRNAs ordered by increasing distance to their nearest protein coding gene. Indicated are numbers of transcripts closer than 10 kb or 100 kb, respectively, to their nearest protein coding genes.

**A**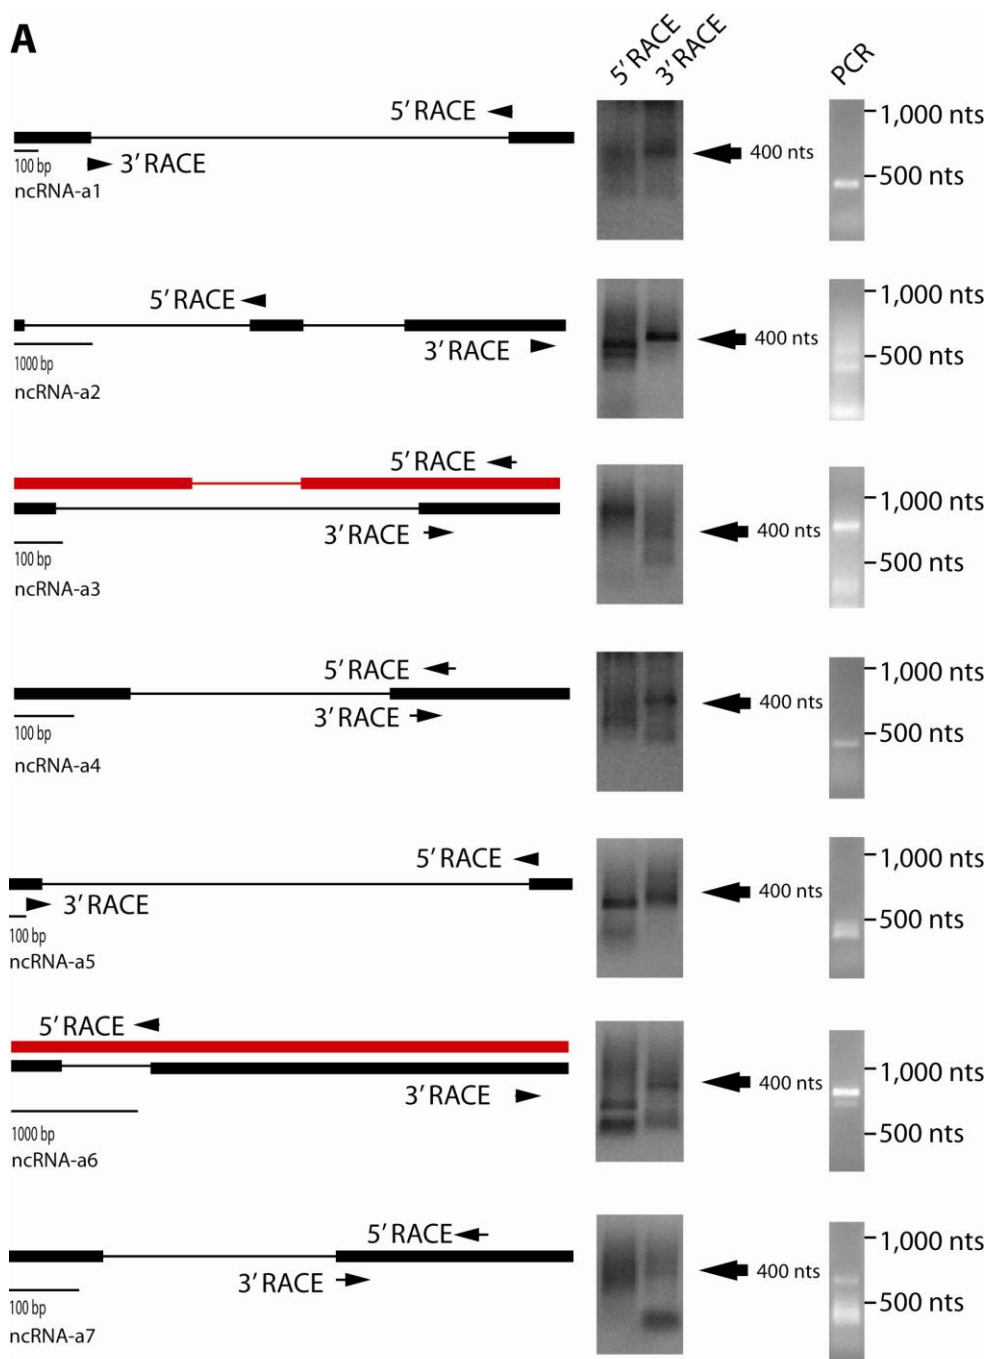**B**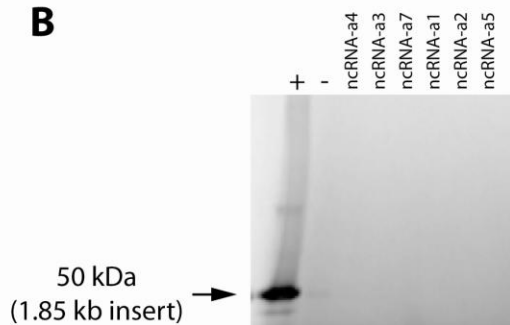

Figure S3. Characterization of the analyzed ncRNA-activators. Related to Figure 3.

(A) RACE analysis of the identified ncRNA-a using the primers indicated (left panel) for 5' and 3' RACE analysis (middle panel). PCR analysis of exon-exon junctions of the transcripts are shown in the right panel. Expected product size according to the HAVANA annotation is around 400 bp. The two bands that appear at a larger size (ncRNA-a3 and ncRNA-a6) were sequenced and showed different processing that annotated, as indicated above these two panels in red

(B) In vitro translation assay. Lane + is the pTRI-REF positive control, lane - is a negative control and following lanes are the indicated ncRNA-a cloned downstream of a T7 promoter and transcribed and used in a translation assay in vitro.

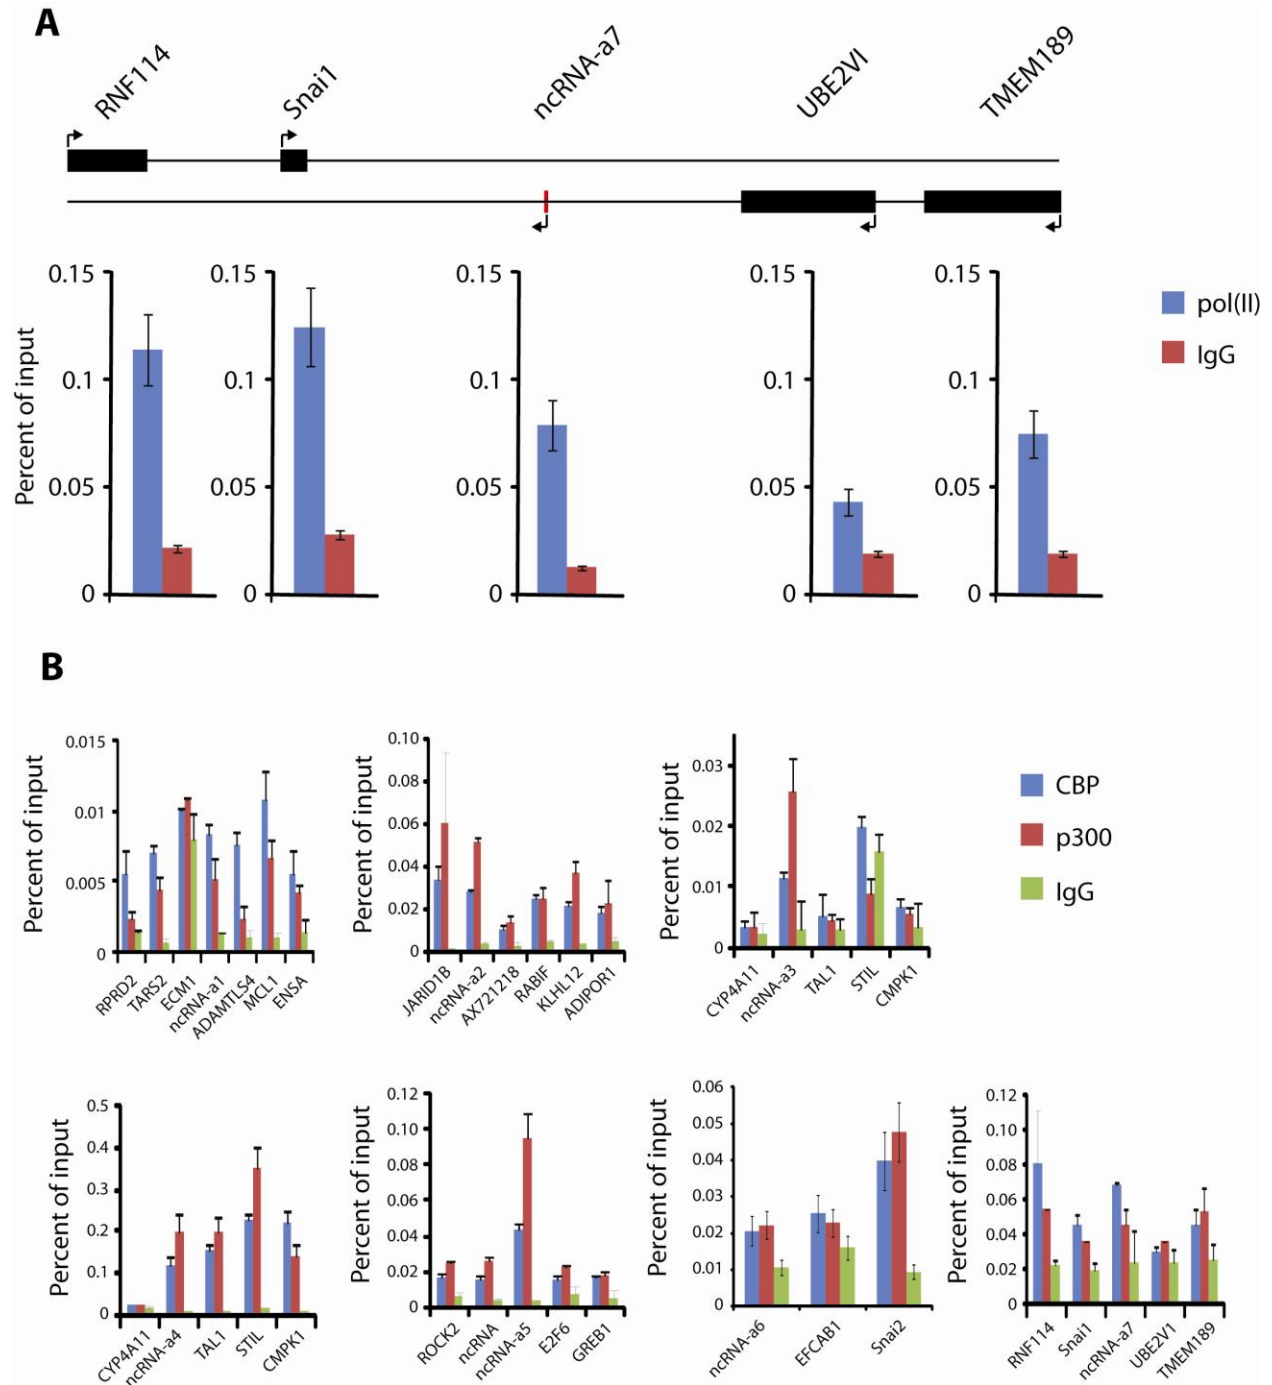

Figure S4. ChIP analysis of the analyzed ncRNA-a loci. Related to Figure 4.

(A) Pol(II) ChIP of the *Snai1* locus.

(B) ChIP for the analyzed ncRNA-a loci using antibodies against p300 or CBP. Y-axes show amount of material in the IP relative to the Input.

| Transcript ID     | HeLa | Keratinocytes | HEK-293 |
|-------------------|------|---------------|---------|
| AC000123.2-001    | V    | V             | V       |
| AC000123.3-001    | V    | V             |         |
| AC000124.1-001    |      | V             |         |
| AC005538.3-002    | V    | V             | V       |
| AC005592.1-001    |      | V             |         |
| AC063976.3-001    | V    | V             |         |
| AC104389.16-001   |      |               | V       |
| AC113617.1-002    |      | V             |         |
| AL163953.3-002    |      | V             |         |
| AP002856.7-001    |      | V             |         |
| RP1-149A16.12-001 | V    |               |         |
| RP11-629E24.2-001 | V    |               |         |
| RP11-65J3.1-001   | V    | V             | V       |
| RP1-90G24.6-001   |      |               | V       |
| RP3-477O4.15-001  | V    | V             | V       |
| RP1-149M18.4-001  | V    |               | V       |

**Table S2.** qPCR validation of the custom microarray expression data for the 1 percent ENCODE region for HeLa cells, human primary keratinocytes and HEK-293 cells. Related to Figure 2.





**Table S4.** Expression data for knock-down analyses of ncRNA-a loci. Related to Figure 3.

| Name     | ID                 | Affected gene | Cell line |
|----------|--------------------|---------------|-----------|
| ncRNA-a1 | OTTHUMT00000087261 | ECM1          | HEK293    |
| ncRNA-a2 | OTTHUMT00000099182 | KLHL12        | HeLa      |
| ncRNA-a3 | OTTHUMT00000021645 | TAL1          | MCF-7     |
| ncRNA-a4 | OTTHUMT00000021648 | CMPK1         | Jurkat    |
| ncRNA-a5 | OTTHUMT00000324045 | ROCK2         | HeLa      |
| ncRNA-a6 | OTTHUMT00000280498 | Snai2         | A549      |
| ncRNA-a7 | OTTHUMT00000079667 | Snai1         | A549      |
|          | OTTHUMT00000054962 | N/A           | HEK293    |
|          | OTTHUMT00000048112 | N/A           | Hs68      |
|          | OTTHUMT00000040694 | N/A           | HeLa      |
|          | OTTHUMT00000089836 | N/A           | HeLa      |
|          | OTTHUMT00000256004 | N/A           | HepG2     |

**Table S5.** ID of the long ncRNAs tested in knock-down experiments. Related to Figure 4.

## Methods

### Extracting long ncRNA data

The HAVANA annotation<sup>12</sup> has been downloaded using the DAS server<sup>26</sup> provided by the Sanger institute (version July, 16th 2008). We removed all annotated biotypes or functional elements belonging to specific categories such as pseudogenes or PCGs. We excluded all transcripts overlapping with known protein coding loci annotated by HAVANA, RefSeq or UCSC<sup>27</sup>. Transcripts falling into a 1kb window (5' and 3' UTRs) of all PCGs were also removed. Finally, we excluded all transcripts covered by known non-coding RNAs such as miRNAs (miRbase version 11.0 April 2008).

### Conservation analysis

To estimate the evolutionary constraints among mammalian sequences we constructed the cumulative distribution of PhastCons<sup>28</sup> scores for ancestral repeats (ARs), RefSeq genes and long ncRNAs using the following datasets. For Ancestral repeats, we used the RepeatMasker annotation<sup>29</sup> for Human genome release Hg18. We excluded repeats annotated as "Simple Repeats", "Low complexity" and primate- or rodents-specific families. For those annotated as RNA or L1, we selected the ones showing more than 25% and 20% divergence, respectively, from consensus in order to ensure that repeats were not recent insertions. Then, we excluded those which overlapped with genes annotated by RefSeq, HAVANA or UCSC, as well as those overlapping miRNAs (miRbase version 11.0, 2008). We kept those which were conserved using the Multiz alignment<sup>30</sup>. Finally, in order to avoid GC bias content due to Biased Gene Conversion<sup>31</sup>, we selected repeats in a close vicinity (10Kb) of long ncRNA loci. RefSeq transcripts<sup>32</sup> have been retrieved from the UCSC genome browser (July 2008). The cumulative distributions of these transcripts or repeats are plotted using a log-scale on the y-axis.

### Cell culture

Human primary keratinocytes from four different biological donors were grown in Keratinocyte medium (KFSM, Invitrogen). Differentiation was induced by 2.5 ng/ml 12-O-tetradecanoylphorbol-13-acetate (TPA) during 48h.

HEK293, A549, HeLa and MCF-7 cells were cultured in complete DMEM media (GIBCO) containing 10 % FBS, and 1X Anti/Anti (GIBCO). Jurkat cells were cultured in complete RPMI media (GIBCO) containing 10 % FBS and 1X Anti/Anti (GIBCO).

### siRNA transfections

For transfections of 293, HeLa, A549 and MCF-7 cells we used Lipofectamine 2000 (Invitrogen) according to the manufacturer's recommendations and an siRNA concentration of 50 nM. Jurkat cells were transfected using HiPerFect (Qiagen) according to the manufacturer's recommendations and an siRNA concentration of 100 nM.

siRNA sequences:

Specific siRNAs for ncRNA-a1

Sense 1 agaacauacaggaggaagauu;

Antisense 1 ucuuccuccuguauguucuuu;

Sense 2 guagcaacucaaacggaauu;

Antisense 2 uccguuugaaguugcuacuu;

siRNA controls for ncRNA-a1

Sense 3 gcuuccugcuacacagaauuu;

Antisense 3 auucuguguagcaggaagcuu;

Sense 4 ggaauguacuauagagccauu;

Antisense 4 uggcucuauaguacauuccuu;

Specific siRNAs for ncRNA-a2

Sense 1 ccuccuacucuuggacaauu;

Antisense 1 uuguccaagaguaaggagguu;

Sense 2 cccacaaacgcuugcgauuuu;

Antisense 2 aaucgcaagcguuugugguu;

siRNA controls for ncRNA-a2

Sense 3 ggaggaaacauuugauuuuuu;

Antisense 3 aauaucaaauguuuccuccuu;

Sense 4 ccucagacggacagcauaauu;

Antisense 4 uuaugcuguccgucugagguu;

Specific siRNAs for ncRNA-a3

Sense 1 cuauggaauuuagcccaau;

Antisense 1 uugggcuaaaauuccauaguu;

Sense 2 gcaagaucacggugcgucuu;

Antisense 2 ugacgcaccgugaucuugcuu;

siRNA controls for ncRNA-a3

Sense 3 ggaauguacuauagagccaau;

Antisense 3 uggcucuauaguacauuccuu;

Sense 4 ccacaagcaucgaggagcauu;

Antisense 4 ugcuccucgaugcuugugguu;

Specific siRNAs for ncRNA-a4

Sense 1 ggaauguacuauagagccaau;

Antisense 1 uggcucuauaguacauuccuu;

Sense 2 ccacaagcaucgaggagcauu;

Antisense 2 ugcuccucgaugcuugugguu;

siRNA controls for ncRNA-a4

Sense 3 cuauggaauuuagcccaau;

Antisense 3 uugggcuaaaauuccauaguu;

Sense 4 gcaagaucacggugcgucuu;

Antisense 4 ugacgcaccgugaucuugcuu;

Specific siRNA sequences for ncRNA-a5

Sense 1 GGAUGUGAGACGUGGAAUCUU;

Antisense 1 GAUUCCACGUCUCAUCCUU;

Sense 2 CCUUGGAGAAUAAAGCUUAUU;

Antisense 2 UAAGCUUUUUCUCCAAGGUU;

siRNA controls for ncRNA-a5

Sense 3 gcuuccugcuacacagaauuu;

Antisense 3 auucuguguagcaggaagcuu;

Sense 4 ggaauguacuauagagccaau;

Antisense 4 uggcucuauaguacauuccuu;

Specific siRNA sequences for ncRNA-a6

Sense 1 GGAGAAAUGAGGAAGUAAAUU;

Antisense 1 UUUACUUCCUCAUUUCUCCUU;

Sense 2 CGAAAGAAGCACAGGGUGUUU;

Antisense 2 ACACCCUGUGCUUCUUUCGUU;

siRNA controls for ncRNA-a6

Sense 3 gcuuccugcuacacagaauuu;

Antisense 3 auucuguguagcaggaagcuu;

Specific siRNA sequences for ncRNA-a7

Sense 1 GAAGGGAACCAGUGC UAAAUU;

Antisense 1 UUUAGCACUGGUUCCCUUCUU;

Sense 2 CCGAUUUGAGAGAGUGAGAUU;

Antisense 2 UCUCACUCUCUCAAUCGGUU;

siRNA controls for ncRNA-a7

Sense 3 gcuuccugcuacacagaauuu;

Antisense 3 auucuguguagcaggaagcuu;

ECM1 siRNA Sense GUGCAGAGGAGGAGAAUUUU

ECM1 siRNA Antisense AAUUUCUCCUCCUCUGCACUU

Snai1 siRNA Sense GCUUUGAGCUACAGGACAAUU

Snai1 siRNA Antisense UUGUCCUGUAGCUCAAAGCUU

## RNA purification, cDNA synthesis and quantitative PCR

Cells were harvested and resuspended in TRIzol (Invitrogen) and RNA extracted according to the manufacturer's protocol. cDNA synthesis was done using MultiScribe reverse transcriptase and random primers from Applied Biosystems. Quantitative PCR was done using SybrGreen reaction mix (Applied Biosystems) and an HT7900 sequence detection system (Applied Biosystems). For all quantitative PCR reactions Gapdh was measured for an internal control and used to normalize the data. Primer sequences are as follows:

ncRNA-a1 FW gcaagcggagactgtcttt;

ncRNA-a1 RV ggctggtcttgaactcctga;

ECM1 FW gccctctgctgttacctgag;

ECM1 RV ccttggcgttctcagtgtct;

TARS2 FW tggatgcagactctggactg;

TARS2 RV ctttgctctttctggccaac;

ADAMTSL4 FW cccagcctgtggatgtctat;

ADAMTSL4 RV caaggattggaggaggtgaa;

MCL1 FW gaaggcgtggagaccttac;

MCL1 RV atgtccagttccgaagcat;

ENSA FW ggtcttgggtgtgatgtgtg;

ENSA RV ggccttagctttgcctctt;

RPRD2 FW gcagctgctctagtgaagga;

RPRD2 RV aaagcttctctcaatgccaca;

ncRNA-a3 FW gtgcgtcagagctagcaaga;

ncRNA-a3 RV tcgtcgggtactctccattc;

ncRNA-a4 FW tcaaccagaaagagacagagca;

ncRNA-a4 RV gcctttcagatcttccattcc;

PDZK1IP1 FW ctgcacacatgatcctgacc;

PDZK1IP1 RV tctcatgctcactggacctg;  
STIL FW ttccttgatggcaagat;  
STIL RV tcagttcacaacggattgga;  
CMPK1 FW ctctctgctctccacgtct;  
CMPK1 RV gcaagatgcatccctcgac;  
CYP4A11 FW ccaactgaggaaggctcaac;  
CYP4A11 RV atttggccaagaggaggat;  
TAL1 FW agggcctggtgaagaagat;  
TAL1 RV aagtaagggcgactggggtt;  
JARID1B FW tcagtgagagagccagaga;  
JARID1B RV ggatagatcggcctcgtgta;  
ncRNA-a2 FW ccttcgcccctagatacacc;  
ncRNA-a2 RV agcacgagcaaggcagag;  
LOC641515 FW ggcagaacctcacctcaaa;  
LOC641515 RV tgtacaagaggctgctcca;  
AX721218 FW aacacctctcagggagacc;  
AX721218 RV cactgtgggggactggtagt;  
NR\_002929 FW aaacctatggagttgctcac;  
NR\_002929 RV tgcttgagttcaggagcttg;  
RABIF FW agggaccgctctctctctc;  
RABIF RV agtgtcctggaggagatcg;  
KLHL12 FW tcaagtgcgacgaaattcag;  
KLHL12 RV gctcttcttgcatgcttc;  
ADIPOR1 FW acatctggacctctgctt;  
ADIPOR1 RV cccaaaaaccaccttctct;

PQLC3 FW1 CCT CAG CCT TCC GAG TTT AC;  
PQLC3 RV1 GAG GAT GGG GTA CTCCAGGT;  
E2F6 FW1 CTT CGC CAT GAA TCC TTC TC;  
E2F6 RV1 TGG AGC CCA TTC CTA CAT TC;  
ncRNA-a5 FW1 AGC CTG CAG CCT TTC TTT C;  
ncRNA-a5 RV1 CAT CCC TTT CCT GGG GTA GT;  
OTTHUMT00000324048 FW1 ATT CCT TGC GAA GCT GAGAG;  
OTTHUMT00000324048 RV1 ACT GCT TAA ATG CGG TTG CT;  
OTTHUMT00000324050 FW1 CAA GGA CAC AGC CAA GTTCA;  
OTTHUMT00000324050 RV1 TCT CTG TTT CCC TGA CCT CCT;  
ROCK2 FW1 TGA AGC CTG ACA ACA TGC TC;  
ROCK2 RV1 TAC CAT GCC TGT TTC ATC CA;  
ncRNA-a7 FW1 CCGTTGGCTCCACAAACCT;  
ncRNA-a7 RV1 CAGTGACAGTAGCAGGCATCCT;  
ncRNA-a6 FW1 CAAGGCATTTTTGCACTCAGTAA;  
ncRNA-a6 RV1 AACACGGCTCAGCTATGGAAA;  
Snai1 FW1 TTCAACTGCAAATACTGCAACAAG;  
Snai1 RV1 TGTGGCTTCGGATGTGCAT;  
Snai2 FW1 CCATTCCACGCCAGCTA;  
Snai2 RV1 TCACTCGCCCCAAAGATGAG;  
TMEM189 FW1 GCTTCGTCTTCTGCCTGATCA;  
TMEM189 RV1 AAAGTACGTGTGCGACCACTTG;  
UBE2V1 FW1 AAGCAAGAGCGACGCAAGAT;  
UBE2V1 RV1 CGGAAATTGCGAGGGACTT;  
RNF114 FW1 GCAGCGCCAACTTCAGAGA;



RNF114 RV1 CATCAACATCATAATCCACAAAAGTG;

AURKA FW1 TTGGAAGACTTGGGTCCTTG;

AURKA RV1 TCAAATATCCCCGCACTCTG;

CDH1 FW1 CCTGGGACTCCACCTACAGA;

CDH1 RV1 TGTGAGCAATTCTGCTTGGA;

PKP2 FW1 ATCCAGGAGCAGGTGCAG;

PKP2 RV1 CTGCTGGTTCGGTGAAGATT;

PLOD2 FW1 GGAACATTACGGCAAATGGT;

PLOD2 RV1 TTCTCCAGATCAACTTGCTTCA;

#### Cloning of pGL3-TK reporters and luciferase assay

pGL3-Basic was digested with BglII and HindIII and the TK promoter from pRL-TK was inserted into these sites. ncRNA inserts were cloned from genomic DNA including a 1,500 bp upstream and a 500 bp downstream region using the primers GGG GAT CCA GCG GTG TGG AAT AAA CTG G and GGG TCG ACC CTG CCT CCT AAG CTT CCT T (for ncRNA-a3/4), GGG GAT CCC ATG CCT CCT TGA GTT CCA T and GGG TCG ACG TGT GTG TCC ATG TGG CTT C (for ncRNA-a5), C CTG GCT CAC AGA TCC TAGC and CC TCTCAGCAGAGGCTGCTTT with an added BamHI or Sall site dependent on the direction of the ncRNA-a7 insert, CTC CAG CAC GTC ATC GAC TA and ATC GGT CTT GTT CTC CCT CA (for ID1 insert) and TTT GGC AGC TCC TCA TCT CT and AAT TAG CGC CAT CGA CAT TC (for GTSF1L). For the control vector (pGL3-TK-control) GGG GAT CCA GCA GGC TTA GGG GAA AGA G and GGG TCG ACC CCT TGC TCA GTC AAG AAG C were used to amplify a 4 kb fragment from genomic DNA not showing any evidence of transcriptional activity. Luciferase assays were performed in 96-well white plates using Dual-Glo (Promega) according to the manufacturer's protocol.

#### RACE

For RACE we used the ExactStart kit from Epi Biotechnologies and the following primers:

ncRNA-a3 5RACE TGG GTC TGG CAC ATT CTG TA

ncRNA-a3 3RACE GAA TTG GAT GCA AGA TCA CG

ncRNA-a4 5RACE GTT CAA ATT CCA GCC TGC TC  
ncRNA-a4 3RACE CAA TTT TAC CGG CAA AGG AA  
ncRNA-a2 5RACE GCT CAA GGC TTG CTA CTT GG  
ncRNA-a2 3RACE CCT TTC CTC CCC AAC AAA CT  
ncRNA-a1 5RACE CTC CTG ACC TCG TGA TCC A  
ncRNA-a1 3RACE CCT GGC CAA GAA GCT CAT AC  
ncRNA-a5 5RACE AAG GCC TAG ATT TTT GCA ACC  
ncRNA-a5 3RACE AGC CTG CAG CCT TTC TTT C  
ncRNA-a7 5RACE ACT GGC TGA GGT TTG TGG AG  
ncRNA-a7 3RACE GGC CGA TTT GAG AGA GTG AG  
ncRNA-a6 5RACE CGC AGC CTC TTC TAA ACA CC  
ncRNA-a6 3RACE CCT TGA GAC CCA TTC ACG TT

ncRNA-a processing PCR

ncRNA-a7 processing FW GGC AGA GAC GGA GAA GAT GA  
ncRNA-a7 processing RV ACT GGC TGA GGT TTG TGG AG  
ncRNA-a3 processing FW TCT TCC CCG TCA CAC TGG  
ncRNA-a3 processing RV AGC GGT GTG GAA TAA ACT GG  
ncRNA-a4 processing FW CAG AAA AGC TCC CGA AAC TG  
ncRNA-a4 processing RV ACT CCC TAG CTT GGC TCT CC  
ncRNA-a2 processing FW CCC CCT CCT TAC TCT TGG AC  
ncRNA-a2 processing RV TGA TGG CAT TGA ATT GGA GA  
ncRNA-a1 processing FW GCA AGC GGA GAC TTG TCT TT  
ncRNA-a1 processing RV TGC TGC CTC CTT TTC TTC AT  
ncRNA-a6processing FW AAC GGA AGG GGG AAT TAT TG

ncRNA-a6 processing RV CGC AGC CTC TTC TAA ACA CC

ncRNA-a5 processing FW AGA CGT AAT GGC ACC CTG CT

ncRNA-a5 processing RV CAA GGC TTG CAA GAA TAG GA

## Microarrays

Custom-made microarrays (Agilent) were designed based on the library of 3,019 long ncRNA sequences, with on average six probes targeting each transcript. Human whole genome mRNA arrays were from Agilent (G4112F). Total RNA samples were converted to cDNA using oligo-dT primers. Labeling of the cDNA and hybridization to the microarrays were performed according to Agilent standard dye swap protocols. Data analysis was done using the AFM 4.0 software. All microarrays were done in 3 biological replicates.

## Transwell migration assay

In vitro cell migration assays were performed as described previously (Gumireddy et al., 2009) using Trans-well chambers (8 $\mu$ M pore size; Costar). Briefly, A549 control or human snail LnRNA siRNA treated cells were allowed to grow to subconfluency (~75–80%) and were serum-starved for 24 h. After detachment with trypsin, cells were washed with PBS, resuspended in serum-free medium and 250  $\mu$ l cell suspensions ( $2 \times 10^5$  cells ml<sup>-1</sup>) was added to the upper chamber of trans-well insert. Complete medium was added to the bottom wells of the chambers. After 10h, the cells that had not migrated through the filter were removed from the upper face of the filters using cotton swabs, and the cells that had migrated to the lower face of the filters were fixed with 5% glutaraldehyde solution and stained with 0.5% solution of Toluidine Blue. Images of three random  $\times 10$  fields were captured from each membrane and the number of migratory cells was counted. The mean of triplicate assays for each experimental condition was used.

## In vitro translation

In vitro translation was done using the ProteinScript II kit from Ambion according to the manufacturer's protocol. ncRNA inserts were cloned from cDNA from RNA harvested

from cells expressing the ncRNAs and cloned downstream of the T7 promoter in pCR2.1 (Invitrogen).

Primers used were as follow:

ncRNA-a4 FW AGC TCA ACT TCC GAG GCT CT

ncRNA-a4 RV GGC TGA AGC CAG CAG AAC T

ncRNA-a3 FW GGC TCT TCC CCG TCA CAC T

ncRNA-a3 RV GCC TCA GCG GTG TGG AAT A

ncRNA-a1 FW CAT CTC CTA CGG CCT CCA G

ncRNA-a1 RV CCA AGT GTC CTG TGT AAT AGG C

ncRNA-a2 FW CAA CCC CAG CCT GGA GGT

ncRNA-a2 RV TAA GTG TTG TAA TAG GGG GTA GTA ACA A

ncRNA-a5 FW ACT GTG CCC TGG ATG TG

ncRNA-a5 RV ATG CAT AAG CTT TAT TCT CCA AGG

ncRNA-a7 FWGGC AGA GAC GGA GAA GAT GA

ncRNA-a7 RV GCC TTA GAC TGT GAA ATT TTA TTG A
