# Supplementary material
Source: PubMed Central journal article supplement (PMC4108080)
Supplement: NIHMS234976-supplement-02.pdf [file NIHMS234976-supplement-02.pdf]

**Inventory of Supplementary Figures and Tables**

Figure S1 Characteristics of the long ncRNA transcripts. Related to Figure 1.

Figure S2 Annotated long ncRNAs are independent transcripts. Related to Figure 2.

Figure S3 Characterization of the analyzed ncRNA-activators. Related to Figure 3.

Figure S4 ChIP analysis of the analyzed ncRNA-a loci. Related to Figure 4.

Table S1 Annotation and genomic coordinates for the identified 3,019 long ncRNAs from the GENCODE annotation. Related to Figure 1.

Table S2 qPCR validation of the custom microarray expression data for the 1 percent ENCODE region for HeLa cells, human primary keratinocytes and HEK-293 cells. Related to Figure 2.

Table S3 99 ncRNAs with a fold change  $>|1.5|$  in keratinocytes after induction of differentiation with TPA treatment using customized expression array. Related to Figure 2.

Table S4 Expression data for knock-down analyses of ncRNA-a loci. Related to Figure 3.

Table S5 ID of the long ncRNAs tested in knock-down experiments. Related to Figure 4.

Table S6 Microarray results from Snai1 and ncRNA-a7 knock-down in A549 cells. Related to Figure 5.

| Transcript ID     | HeLa | Keratinocytes | HEK-293 |
|-------------------|------|---------------|---------|
| AC000123.2-001    | V    | V             | V       |
| AC000123.3-001    | V    | V             |         |
| AC000124.1-001    |      | V             |         |
| AC005538.3-002    | V    | V             | V       |
| AC005592.1-001    |      | V             |         |
| AC063976.3-001    | V    | V             |         |
| AC104389.16-001   |      |               | V       |
| AC113617.1-002    |      | V             |         |
| AL163953.3-002    |      | V             |         |
| AP002856.7-001    |      | V             |         |
| RP1-149A16.12-001 | V    |               |         |
| RP11-629E24.2-001 | V    |               |         |
| RP11-65J3.1-001   | V    | V             | V       |
| RP1-90G24.6-001   |      |               | V       |
| RP3-477O4.15-001  | V    | V             | V       |
| RP1-149M18.4-001  | V    |               | V       |

**Table S2.** qPCR validation of the custom microarray expression data for the 1 percent ENCODE region for HeLa cells, human primary keratinocytes and HEK-293 cells. Related to Figure 2.



**Table S4.** Expression data for knock-down analyses of ncRNA-a loci. Related to Figure 3.

| Name     | ID                 | Affected gene | Cell line |
|----------|--------------------|---------------|-----------|
| ncRNA-a1 | OTTHUMT00000087261 | ECM1          | HEK293    |
| ncRNA-a2 | OTTHUMT00000099182 | KLHL12        | HeLa      |
| ncRNA-a3 | OTTHUMT00000021645 | TAL1          | MCF-7     |
| ncRNA-a4 | OTTHUMT00000021648 | CMPK1         | Jurkat    |
| ncRNA-a5 | OTTHUMT00000324045 | ROCK2         | HeLa      |
| ncRNA-a6 | OTTHUMT00000280498 | Snai2         | A549      |
| ncRNA-a7 | OTTHUMT00000079667 | Snai1         | A549      |
|          | OTTHUMT00000054962 | N/A           | HEK293    |
|          | OTTHUMT00000048112 | N/A           | Hs68      |
|          | OTTHUMT00000040694 | N/A           | HeLa      |
|          | OTTHUMT00000089836 | N/A           | HeLa      |
|          | OTTHUMT00000256004 | N/A           | HepG2     |

**Table S5.** ID of the long ncRNAs tested in knock-down experiments. Related to Figure 4.

| Gencode Gene Id     | Gencode Transcript Id | Location             | Strand | Size (bp) |
|---------------------|-----------------------|----------------------|--------|-----------|
| OTTHUMG0000001097   | OTTHUMT00000003226    | chr1:79414-80968     | -      | 1317      |
| OTTHUMG00000002481  | OTTHUMT00000007038    | chr1:129653-130202   | -      | 321       |
| OTTHUMG00000002479  | OTTHUMT00000007035    | chr1:131337-139570   | -      | 4858      |
| OTTHUMG00000002479  | OTTHUMT00000007036    | chr1:132671-136694   | -      | 515       |
| OTTHUMG00000002525  | OTTHUMT00000007169    | chr1:150309-151388   | +      | 455       |
| OTTHUMG00000002480  | OTTHUMT00000007037    | chr1:154268-163727   | -      | 966       |
| OTTHUMG00000002480  | OTTHUMT00000007168    | chr1:155752-158630   | -      | 275       |
| OTTHUMG00000002858  | OTTHUMT00000007997    | chr1:410069-411705   | +      | 802       |
| OTTHUMG00000002856  | OTTHUMT00000007990    | chr1:440750-443805   | +      | 496       |
| OTTHUMG00000002856  | OTTHUMT00000007989    | chr1:443080-443811   | +      | 404       |
| OTTHUMG00000002855  | OTTHUMT00000007988    | chr1:443496-450343   | -      | 605       |
| OTTHUMG00000002855  | OTTHUMT00000007987    | chr1:443690-450328   | -      | 424       |
| OTTHUMG00000002854  | OTTHUMT00000007985    | chr1:449519-461231   | +      | 1832      |
| OTTHUMG00000002854  | OTTHUMT00000007986    | chr1:451017-453713   | +      | 2233      |
| OTTHUMG00000002854  | OTTHUMT00000007984    | chr1:455073-461231   | +      | 590       |
| OTTHUMG00000002261  | OTTHUMT00000006453    | chr1:511232-513696   | -      | 839       |
| OTTHUMG00000002329  | OTTHUMT00000006707    | chr1:512872-520011   | +      | 605       |
| OTTHUMG00000002329  | OTTHUMT00000006706    | chr1:512911-519817   | +      | 400       |
| OTTHUMG00000002330  | OTTHUMT00000006708    | chr1:519696-520458   | +      | 435       |
| OTTHUMG00000002330  | OTTHUMT00000006709    | chr1:519702-522741   | +      | 496       |
| OTTHUMG00000002407  | OTTHUMT00000006890    | chr1:667056-675259   | -      | 4858      |
| OTTHUMG00000002409  | OTTHUMT00000006892    | chr1:684275-690168   | -      | 293       |
| OTTHUMG00000002408  | OTTHUMT00000006891    | chr1:686154-687232   | +      | 454       |
| OTTHUMG00000002406  | OTTHUMT00000006889    | chr1:690100-703869   | -      | 1310      |
| OTTHUMG00000002402  | OTTHUMT00000006884    | chr1:704025-707434   | +      | 564       |
| OTTHUMG00000002402  | OTTHUMT00000006885    | chr1:704299-730118   | +      | 438       |
| OTTHUMG00000002466  | OTTHUMT00000007013    | chr1:707188-709933   | +      | 511       |
| OTTHUMG00000002403  | OTTHUMT00000006886    | chr1:726122-735404   | -      | 519       |
| OTTHUMG00000002404  | OTTHUMT00000006887    | chr1:730042-732708   | +      | 415       |
| OTTHUMG00000002404  | OTTHUMT000000099678   | chr1:730175-735303   | +      | 578       |
| OTTHUMG00000002467  | OTTHUMT00000007014    | chr1:735352-742955   | -      | 400       |
| OTTHUMG00000002471  | OTTHUMT00000007025    | chr1:742614-745077   | +      | 1942      |
| OTTHUMG000000040716 | OTTHUMT000000097856   | chr1:836678-840191   | +      | 3041      |
| OTTHUMG000000040717 | OTTHUMT000000097857   | chr1:839414-840214   | +      | 441       |
| OTTHUMG000000040718 | OTTHUMT000000097858   | chr1:842113-844935   | -      | 1385      |
| OTTHUMG000000040718 | OTTHUMT000000097859   | chr1:842613-843777   | -      | 628       |
| OTTHUMG00000002913  | OTTHUMT00000008136    | chr1:1350695-1353042 | -      | 441       |
| OTTHUMG000000153395 | OTTHUMT000000331012   | chr1:1351419-1352868 | +      | 280       |
| OTTHUMG00000002914  | OTTHUMT00000008137    | chr1:1353365-1355498 | -      | 1208      |
| OTTHUMG000000041065 | OTTHUMT000000098494   | chr1:1934512-1936829 | -      | 1952      |
| OTTHUMG00000001636  | OTTHUMT00000004637    | chr1:2347279-2351949 | +      | 369       |
| OTTHUMG00000000818  | OTTHUMT000000002188   | chr1:2471219-2472566 | -      | 629       |
| OTTHUMG00000000818  | OTTHUMT000000002186   | chr1:2471219-2473405 | -      | 1626      |
| OTTHUMG00000000818  | OTTHUMT000000002189   | chr1:2471219-2476518 | -      | 498       |

|                    |                    |                        |   |      |
|--------------------|--------------------|------------------------|---|------|
| OTTHUMG0000000818  | OTTHUMT0000002185  | chr1:2471219-2476569   | - | 1510 |
| OTTHUMG0000000818  | OTTHUMT0000002187  | chr1:2471582-2476423   | - | 3601 |
| OTTHUMG0000000818  | OTTHUMT0000002190  | chr1:2471871-2474474   | - | 512  |
| OTTHUMG0000000819  | OTTHUMT0000002191  | chr1:2502859-2505832   | + | 623  |
| OTTHUMG0000000564  | OTTHUMT0000001337  | chr1:2718275-2719117   | - | 605  |
| OTTHUMG0000000565  | OTTHUMT0000001338  | chr1:2720857-2721423   | - | 427  |
| OTTHUMG0000000499  | OTTHUMT0000001801  | chr1:3900533-3909271   | + | 558  |
| OTTHUMG0000000499  | OTTHUMT0000001241  | chr1:3900537-3915182   | + | 3239 |
| OTTHUMG0000000731  | OTTHUMT0000001812  | chr1:3907069-3908900   | - | 934  |
| OTTHUMG0000000733  | OTTHUMT0000001814  | chr1:4371971-4384607   | + | 2071 |
| OTTHUMG0000000646  | OTTHUMT0000001544  | chr1:4511655-4512065   | + | 354  |
| OTTHUMG0000000647  | OTTHUMT0000001545  | chr1:4531468-4543341   | + | 677  |
| OTTHUMG00000041729 | OTTHUMT00000099750 | chr1:5046379-5050819   | - | 445  |
| OTTHUMG00000041453 | OTTHUMT00000099317 | chr1:5570015-5650942   | - | 361  |
| OTTHUMG0000001785  | OTTHUMT0000004978  | chr1:6707284-6710055   | + | 1684 |
| OTTHUMG0000001785  | OTTHUMT0000004979  | chr1:6707284-6712659   | + | 505  |
| OTTHUMG0000001785  | OTTHUMT0000004980  | chr1:6710174-6712659   | + | 377  |
| OTTHUMG0000001222  | OTTHUMT0000003621  | chr1:7988661-7989371   | - | 408  |
| OTTHUMG0000001769  | OTTHUMT0000004930  | chr1:8191319-8197857   | + | 493  |
| OTTHUMG0000001770  | OTTHUMT0000004931  | chr1:8200837-8203176   | - | 475  |
| OTTHUMG0000001762  | OTTHUMT0000004910  | chr1:9150914-9185265   | - | 544  |
| OTTHUMG0000001764  | OTTHUMT0000004915  | chr1:9164858-9166442   | + | 267  |
| OTTHUMG0000001278  | OTTHUMT0000003726  | chr1:9483738-9486117   | - | 706  |
| OTTHUMG0000002076  | OTTHUMT0000005777  | chr1:11592175-11595999 | + | 1282 |
| OTTHUMG00000013154 | OTTHUMT00000036896 | chr1:12510353-12511049 | + | 436  |
| OTTHUMG00000041465 | OTTHUMT00000099354 | chr1:12805136-12805609 | - | 376  |
| OTTHUMG00000009500 | OTTHUMT00000026266 | chr1:13069364-13069843 | + | 382  |
| OTTHUMG00000008038 | OTTHUMT00000022044 | chr1:13302221-13302694 | + | 376  |
| OTTHUMG00000007914 | OTTHUMT00000021789 | chr1:13523018-13523497 | + | 382  |
| OTTHUMG00000007915 | OTTHUMT00000021790 | chr1:13856393-13859620 | - | 1005 |
| OTTHUMG00000002047 | OTTHUMT00000005700 | chr1:14420973-14422200 | - | 280  |
| OTTHUMG00000002044 | OTTHUMT00000005696 | chr1:14548037-14550105 | - | 577  |
| OTTHUMG00000035305 | OTTHUMT00000085369 | chr1:16358348-16360965 | + | 542  |
| OTTHUMG00000002490 | OTTHUMT00000007047 | chr1:16719776-16720890 | + | 340  |
| OTTHUMG00000002201 | OTTHUMT00000006252 | chr1:17050285-17051881 | - | 605  |
| OTTHUMG00000002201 | OTTHUMT00000006251 | chr1:17050403-17052211 | - | 731  |
| OTTHUMG00000002202 | OTTHUMT00000006253 | chr1:17054489-17058366 | + | 879  |
| OTTHUMG00000002291 | OTTHUMT00000006615 | chr1:17388865-17396699 | + | 4673 |
| OTTHUMG00000002515 | OTTHUMT00000007156 | chr1:17916769-17949060 | + | 606  |
| OTTHUMG00000002437 | OTTHUMT00000006932 | chr1:18584910-18587595 | + | 489  |
| OTTHUMG00000002703 | OTTHUMT00000007685 | chr1:20353418-20359648 | + | 1081 |
| OTTHUMG00000002703 | OTTHUMT00000007686 | chr1:20356772-20359646 | + | 2491 |
| OTTHUMG00000002707 | OTTHUMT00000007692 | chr1:20442175-20443735 | + | 478  |
| OTTHUMG00000002842 | OTTHUMT00000007957 | chr1:20559659-20627862 | - | 2981 |
| OTTHUMG00000002842 | OTTHUMT00000007958 | chr1:20597185-20627819 | - | 780  |

|                     |                     |                        |   |      |
|---------------------|---------------------|------------------------|---|------|
| OTTHUMG00000002842  | OTTHUMT00000007959  | chr1:20597796-20630314 | - | 349  |
| OTTHUMG00000002843  | OTTHUMT00000007960  | chr1:20611384-20612333 | - | 373  |
| OTTHUMG00000002945  | OTTHUMT00000008191  | chr1:21614978-21616572 | + | 604  |
| OTTHUMG00000002945  | OTTHUMT00000008192  | chr1:21615402-21616454 | + | 602  |
| OTTHUMG000000037843 | OTTHUMT000000092373 | chr1:21785552-21790267 | + | 819  |
| OTTHUMG00000002754  | OTTHUMT00000007790  | chr1:22223074-22224048 | - | 613  |
| OTTHUMG00000002757  | OTTHUMT000000096539 | chr1:22224268-22229983 | + | 807  |
| OTTHUMG00000002757  | OTTHUMT000000096538 | chr1:22224591-22229880 | + | 768  |
| OTTHUMG00000002757  | OTTHUMT00000007795  | chr1:22224614-22230303 | + | 1052 |
| OTTHUMG00000002757  | OTTHUMT000000096537 | chr1:22227419-22229692 | + | 372  |
| OTTHUMG000000037485 | OTTHUMT000000091258 | chr1:23748217-23749993 | - | 454  |
| OTTHUMG00000003038  | OTTHUMT00000008408  | chr1:24399317-24410770 | + | 1847 |
| OTTHUMG00000003326  | OTTHUMT00000009330  | chr1:25242785-25312197 | - | 487  |
| OTTHUMG00000003326  | OTTHUMT00000009331  | chr1:25309536-25312198 | - | 612  |
| OTTHUMG000000041667 | OTTHUMT000000099668 | chr1:25407217-25407947 | + | 418  |
| OTTHUMG000000041621 | OTTHUMT000000099620 | chr1:25452385-25466963 | - | 775  |
| OTTHUMG00000004419  | OTTHUMT00000012834  | chr1:25780556-25789434 | + | 481  |
| OTTHUMG00000004228  | OTTHUMT00000012180  | chr1:27075211-27077323 | + | 304  |
| OTTHUMG00000003517  | OTTHUMT00000009779  | chr1:27724903-27729659 | + | 281  |
| OTTHUMG00000003519  | OTTHUMT00000009783  | chr1:27859426-27861820 | - | 439  |
| OTTHUMG00000003650  | OTTHUMT00000010343  | chr1:29066674-29070366 | + | 1744 |
| OTTHUMG00000003651  | OTTHUMT00000010344  | chr1:29069582-29076435 | - | 1082 |
| OTTHUMG00000003931  | OTTHUMT00000011215  | chr1:29528719-29549213 | - | 2145 |
| OTTHUMG000000037527 | OTTHUMT000000091409 | chr1:29954285-29954981 | - | 496  |
| OTTHUMG00000003683  | OTTHUMT00000010417  | chr1:30259386-30283046 | - | 2512 |
| OTTHUMG00000003685  | OTTHUMT00000010419  | chr1:30385697-30387041 | + | 549  |
| OTTHUMG00000003682  | OTTHUMT00000010416  | chr1:30654994-30657072 | - | 504  |
| OTTHUMG000000037511 | OTTHUMT000000091345 | chr1:30661259-30666542 | + | 478  |
| OTTHUMG00000003704  | OTTHUMT00000010457  | chr1:31055812-31060987 | - | 442  |
| OTTHUMG00000003749  | OTTHUMT00000010559  | chr1:31069662-31079280 | + | 666  |
| OTTHUMG00000003749  | OTTHUMT00000010557  | chr1:31070109-31079167 | + | 443  |
| OTTHUMG000000043647 | OTTHUMT000000102020 | chr1:31103592-31105688 | + | 1745 |
| OTTHUMG00000003882  | OTTHUMT00000011056  | chr1:31756623-31762433 | + | 2738 |
| OTTHUMG00000003882  | OTTHUMT000000091360 | chr1:31760551-31761777 | + | 1120 |
| OTTHUMG00000003927  | OTTHUMT00000011211  | chr1:32080207-32093756 | - | 2255 |
| OTTHUMG00000007633  | OTTHUMT00000020212  | chr1:32587382-32588851 | - | 685  |
| OTTHUMG000000037927 | OTTHUMT000000092577 | chr1:32589442-32590610 | + | 657  |
| OTTHUMG00000007632  | OTTHUMT00000020210  | chr1:32589709-32591730 | + | 264  |
| OTTHUMG00000007855  | OTTHUMT00000021667  | chr1:32719218-32726048 | + | 2798 |
| OTTHUMG000000041501 | OTTHUMT000000099440 | chr1:32955922-32963425 | - | 393  |
| OTTHUMG00000004048  | OTTHUMT00000011553  | chr1:35088882-35089743 | + | 718  |
| OTTHUMG00000004157  | OTTHUMT00000012077  | chr1:35414566-35415849 | - | 438  |
| OTTHUMG00000004157  | OTTHUMT00000011997  | chr1:35414566-35418833 | - | 2832 |
| OTTHUMG00000004157  | OTTHUMT00000012076  | chr1:35414568-35417293 | - | 658  |
| OTTHUMG00000004157  | OTTHUMT00000011998  | chr1:35414568-35417434 | - | 1428 |

|                     |                    |                        |   |      |
|---------------------|--------------------|------------------------|---|------|
| OTTHUMG00000004157  | OTTHUMT00000012071 | chr1:35414568-35419532 | - | 430  |
| OTTHUMG00000004157  | OTTHUMT00000012075 | chr1:35414568-35419794 | - | 689  |
| OTTHUMG00000004157  | OTTHUMT00000012074 | chr1:35415397-35416324 | - | 337  |
| OTTHUMG00000004187  | OTTHUMT00000012051 | chr1:37011328-37013956 | + | 461  |
| OTTHUMG00000004188  | OTTHUMT00000012052 | chr1:37500927-37563288 | - | 592  |
| OTTHUMG00000000479  | OTTHUMT00000001202 | chr1:38447293-38453026 | - | 2279 |
| OTTHUMG00000000481  | OTTHUMT00000001204 | chr1:38713455-38714743 | + | 787  |
| OTTHUMG000000007457 | OTTHUMT00000019595 | chr1:40907348-40925847 | - | 466  |
| OTTHUMG000000007731 | OTTHUMT00000020814 | chr1:41102173-41114929 | + | 468  |
| OTTHUMG000000007603 | OTTHUMT00000020145 | chr1:46413745-46414737 | - | 393  |
| OTTHUMG000000007814 | OTTHUMT00000021455 | chr1:46684932-46687963 | - | 1126 |
| OTTHUMG000000007985 | OTTHUMT00000021917 | chr1:46694082-46720734 | + | 352  |
| OTTHUMG000000007981 | OTTHUMT00000021894 | chr1:46996534-47005887 | + | 484  |
| OTTHUMG000000007848 | OTTHUMT00000021645 | chr1:47416428-47417530 | - | 361  |
| OTTHUMG000000007850 | OTTHUMT00000021648 | chr1:47417509-47418416 | + | 477  |
| OTTHUMG000000007965 | OTTHUMT00000021847 | chr1:47619187-47646736 | - | 480  |
| OTTHUMG000000007949 | OTTHUMT00000021830 | chr1:47670392-47672900 | - | 2508 |
| OTTHUMG000000007956 | OTTHUMT00000021838 | chr1:47926722-47941642 | + | 812  |
| OTTHUMG000000007958 | OTTHUMT00000021840 | chr1:47999391-48003806 | - | 405  |
| OTTHUMG000000007960 | OTTHUMT00000021842 | chr1:48003895-48039882 | - | 1153 |
| OTTHUMG000000007961 | OTTHUMT00000021843 | chr1:48056325-48058496 | + | 1805 |
| OTTHUMG000000007952 | OTTHUMT00000021833 | chr1:48291804-48295035 | + | 509  |
| OTTHUMG000000007952 | OTTHUMT00000021834 | chr1:48292468-48305460 | + | 786  |
| OTTHUMG000000008050 | OTTHUMT00000022065 | chr1:48317046-48320455 | - | 290  |
| OTTHUMG000000007963 | OTTHUMT00000021845 | chr1:48339974-48400130 | - | 640  |
| OTTHUMG000000007957 | OTTHUMT00000021839 | chr1:48444224-48445102 | + | 267  |
| OTTHUMG000000007882 | OTTHUMT00000021721 | chr1:50444343-50461386 | - | 248  |
| OTTHUMG000000008195 | OTTHUMT00000022441 | chr1:51433355-51473356 | - | 2364 |
| OTTHUMG000000008075 | OTTHUMT00000022105 | chr1:53586748-53587493 | - | 381  |
| OTTHUMG000000008077 | OTTHUMT00000022107 | chr1:53604928-53606505 | - | 848  |
| OTTHUMG000000008363 | OTTHUMT00000023025 | chr1:54650969-54651727 | - | 451  |
| OTTHUMG000000008362 | OTTHUMT00000023024 | chr1:54654517-54659121 | + | 287  |
| OTTHUMG000000008359 | OTTHUMT00000023021 | chr1:54754673-54755520 | - | 681  |
| OTTHUMG000000008243 | OTTHUMT00000022600 | chr1:56062068-56106509 | + | 640  |
| OTTHUMG000000008245 | OTTHUMT00000022602 | chr1:56183348-56188380 | + | 451  |
| OTTHUMG000000008126 | OTTHUMT00000022251 | chr1:56383981-56393484 | + | 728  |
| OTTHUMG000000008128 | OTTHUMT00000022253 | chr1:56653223-56654226 | + | 541  |
| OTTHUMG000000008327 | OTTHUMT00000022925 | chr1:57061940-57065181 | - | 1822 |
| OTTHUMG000000008374 | OTTHUMT00000023039 | chr1:59076708-59089514 | - | 392  |
| OTTHUMG000000008375 | OTTHUMT00000023040 | chr1:59121128-59134925 | - | 1207 |
| OTTHUMG000000008375 | OTTHUMT00000023041 | chr1:59134105-59134963 | - | 217  |
| OTTHUMG000000008373 | OTTHUMT00000023037 | chr1:59258647-59271323 | + | 527  |
| OTTHUMG000000008373 | OTTHUMT00000023038 | chr1:59258848-59282874 | + | 302  |
| OTTHUMG000000008373 | OTTHUMT00000023093 | chr1:59258859-59261280 | + | 149  |
| OTTHUMG000000008401 | OTTHUMT00000023099 | chr1:59292657-59294309 | - | 169  |



|                    |                     |                        |   |      |
|--------------------|---------------------|------------------------|---|------|
| OTTHUMG0000008402  | OTTHUMT00000023100  | chr1:59294259-59316376 | - | 314  |
| OTTHUMG0000008404  | OTTHUMT00000023103  | chr1:59294903-59326455 | - | 619  |
| OTTHUMG0000008403  | OTTHUMT00000023101  | chr1:59370196-59384987 | - | 960  |
| OTTHUMG0000008403  | OTTHUMT00000023102  | chr1:59370774-59436881 | - | 769  |
| OTTHUMG0000008767  | OTTHUMT00000024223  | chr1:60011055-60027108 | + | 544  |
| OTTHUMG0000008994  | OTTHUMT00000024949  | chr1:60353135-60387939 | + | 680  |
| OTTHUMG0000009978  | OTTHUMT00000027657  | chr1:60778509-60878751 | - | 1788 |
| OTTHUMG0000008422  | OTTHUMT00000023196  | chr1:60897891-61063844 | - | 2338 |
| OTTHUMG00000057525 | OTTHUMT000000127843 | chr1:63134268-63139898 | + | 445  |
| OTTHUMG0000009147  | OTTHUMT00000025348  | chr1:63238756-63249184 | - | 353  |
| OTTHUMG0000009147  | OTTHUMT00000025347  | chr1:63238756-63249527 | - | 488  |
| OTTHUMG0000009147  | OTTHUMT00000025346  | chr1:63238756-63250730 | - | 443  |
| OTTHUMG0000009148  | OTTHUMT00000025349  | chr1:63262466-63263917 | + | 357  |
| OTTHUMG00000013351 | OTTHUMT00000037178  | chr1:63316340-63317290 | - | 155  |
| OTTHUMG0000009144  | OTTHUMT00000025342  | chr1:63377509-63401412 | + | 820  |
| OTTHUMG0000009145  | OTTHUMT00000025343  | chr1:63488282-63490030 | + | 752  |
| OTTHUMG0000009304  | OTTHUMT00000025777  | chr1:65304898-65306008 | - | 308  |
| OTTHUMG0000009373  | OTTHUMT00000025987  | chr1:67767901-67770600 | + | 405  |
| OTTHUMG0000009216  | OTTHUMT00000025521  | chr1:69294169-69423274 | + | 622  |
| OTTHUMG0000009218  | OTTHUMT00000025523  | chr1:69481643-69487694 | - | 432  |
| OTTHUMG0000009217  | OTTHUMT00000025522  | chr1:69671526-69673680 | + | 456  |
| OTTHUMG0000009349  | OTTHUMT00000025915  | chr1:70944724-71024739 | + | 2079 |
| OTTHUMG0000009350  | OTTHUMT00000025916  | chr1:70954204-70958560 | - | 430  |
| OTTHUMG0000009658  | OTTHUMT00000026633  | chr1:71489270-71490390 | + | 516  |
| OTTHUMG0000009453  | OTTHUMT00000026184  | chr1:72987192-73137411 | - | 494  |
| OTTHUMG0000009452  | OTTHUMT00000026183  | chr1:73013542-73029551 | + | 1325 |
| OTTHUMG0000009566  | OTTHUMT00000026413  | chr1:73544441-73577148 | + | 3867 |
| OTTHUMG0000009566  | OTTHUMT00000026416  | chr1:73544500-73586583 | + | 360  |
| OTTHUMG0000009566  | OTTHUMT00000026417  | chr1:73544505-73593522 | + | 355  |
| OTTHUMG0000009566  | OTTHUMT00000026415  | chr1:73544510-73545843 | + | 439  |
| OTTHUMG0000009566  | OTTHUMT00000026414  | chr1:73545487-73557932 | + | 477  |
| OTTHUMG0000009567  | OTTHUMT00000026418  | chr1:73873487-73947852 | + | 554  |
| OTTHUMG0000009568  | OTTHUMT00000026419  | chr1:73947639-73953485 | + | 318  |
| OTTHUMG00000042097 | OTTHUMT000000100228 | chr1:75201586-75203390 | + | 337  |
| OTTHUMG0000009790  | OTTHUMT00000026985  | chr1:76249597-76257629 | + | 366  |
| OTTHUMG0000009791  | OTTHUMT00000026986  | chr1:76279964-76304501 | + | 397  |
| OTTHUMG0000009684  | OTTHUMT00000026685  | chr1:76996397-77017540 | - | 445  |
| OTTHUMG0000009688  | OTTHUMT00000026695  | chr1:77306193-77316755 | + | 493  |
| OTTHUMG0000009742  | OTTHUMT00000026864  | chr1:79562042-79563122 | + | 340  |
| OTTHUMG0000009712  | OTTHUMT00000026797  | chr1:80611637-80612894 | - | 578  |
| OTTHUMG0000000506  | OTTHUMT00000001249  | chr1:80773251-80822636 | - | 347  |
| OTTHUMG0000000507  | OTTHUMT00000001250  | chr1:80774028-80885061 | + | 540  |
| OTTHUMG0000000507  | OTTHUMT00000001251  | chr1:80774028-80885061 | + | 587  |
| OTTHUMG0000000507  | OTTHUMT00000001252  | chr1:80879557-80885061 | + | 470  |
| OTTHUMG0000009845  | OTTHUMT00000027201  | chr1:82453492-82499405 | - | 669  |

|                    |                    |                          |   |      |
|--------------------|--------------------|--------------------------|---|------|
| OTTHUMG0000009769  | OTTHUMT00000026937 | chr1:83141454-83405086   | + | 1701 |
| OTTHUMG0000009769  | OTTHUMT00000026938 | chr1:83145833-83235832   | + | 334  |
| OTTHUMG0000009770  | OTTHUMT00000026940 | chr1:83212153-83223193   | - | 1523 |
| OTTHUMG0000009770  | OTTHUMT00000026939 | chr1:83212200-83224479   | - | 1473 |
| OTTHUMG0000009772  | OTTHUMT00000026942 | chr1:83684324-83693042   | + | 734  |
| OTTHUMG0000009930  | OTTHUMT00000027492 | chr1:83814047-84099267   | - | 3174 |
| OTTHUMG0000009931  | OTTHUMT00000027497 | chr1:84028551-84039736   | + | 680  |
| OTTHUMG0000009930  | OTTHUMT00000027496 | chr1:84039787-84098817   | - | 1988 |
| OTTHUMG0000009930  | OTTHUMT00000027494 | chr1:84069892-84099214   | - | 468  |
| OTTHUMG0000009930  | OTTHUMT00000027493 | chr1:84069892-84099241   | - | 380  |
| OTTHUMG0000009930  | OTTHUMT00000027495 | chr1:84069892-84099294   | - | 397  |
| OTTHUMG00000010575 | OTTHUMT00000029185 | chr1:85837402-85839005   | + | 253  |
| OTTHUMG00000010252 | OTTHUMT00000028275 | chr1:87591795-87609926   | - | 885  |
| OTTHUMG00000037985 | OTTHUMT00000092710 | chr1:88138180-88143985   | - | 784  |
| OTTHUMG00000010585 | OTTHUMT00000029206 | chr1:90001692-90008050   | + | 1833 |
| OTTHUMG00000010584 | OTTHUMT00000029205 | chr1:90027061-90028639   | + | 507  |
| OTTHUMG00000010672 | OTTHUMT00000029425 | chr1:90193813-90194869   | - | 596  |
| OTTHUMG00000010017 | OTTHUMT00000027723 | chr1:90749055-90771617   | - | 227  |
| OTTHUMG00000010018 | OTTHUMT00000027724 | chr1:91067692-91074306   | - | 2984 |
| OTTHUMG00000010018 | OTTHUMT00000027725 | chr1:91069670-91089763   | - | 806  |
| OTTHUMG00000010018 | OTTHUMT00000027726 | chr1:91070014-91089795   | - | 709  |
| OTTHUMG00000010019 | OTTHUMT00000027727 | chr1:91089904-91092431   | + | 578  |
| OTTHUMG00000010623 | OTTHUMT00000029326 | chr1:94383255-94383763   | + | 350  |
| OTTHUMG00000010648 | OTTHUMT00000029383 | chr1:94486052-94487636   | + | 210  |
| OTTHUMG00000010651 | OTTHUMT00000029386 | chr1:94556623-94562713   | - | 590  |
| OTTHUMG00000010650 | OTTHUMT00000029385 | chr1:94571411-94572992   | + | 478  |
| OTTHUMG00000010718 | OTTHUMT00000029603 | chr1:94823700-94830441   | - | 2169 |
| OTTHUMG00000010719 | OTTHUMT00000029604 | chr1:94859295-94862328   | - | 2270 |
| OTTHUMG00000010911 | OTTHUMT00000030082 | chr1:95549072-95556407   | - | 380  |
| OTTHUMG00000010912 | OTTHUMT00000030083 | chr1:95589395-95590398   | - | 600  |
| OTTHUMG00000010913 | OTTHUMT00000030084 | chr1:95594163-95619144   | - | 1010 |
| OTTHUMG00000010913 | OTTHUMT00000030085 | chr1:95594379-95619116   | - | 841  |
| OTTHUMG00000010909 | OTTHUMT00000030074 | chr1:95712881-95717500   | + | 2751 |
| OTTHUMG00000010665 | OTTHUMT00000030151 | chr1:95748304-95752873   | + | 780  |
| OTTHUMG00000010665 | OTTHUMT00000029413 | chr1:95748311-96020486   | + | 710  |
| OTTHUMG00000010665 | OTTHUMT00000030150 | chr1:95748314-95860878   | + | 317  |
| OTTHUMG00000010665 | OTTHUMT00000030152 | chr1:95748484-95753608   | + | 1437 |
| OTTHUMG00000010691 | OTTHUMT00000029471 | chr1:96176045-96261010   | + | 477  |
| OTTHUMG00000010691 | OTTHUMT00000029474 | chr1:96227951-96261010   | + | 856  |
| OTTHUMG00000010691 | OTTHUMT00000029472 | chr1:96230212-96261010   | + | 794  |
| OTTHUMG00000010691 | OTTHUMT00000029473 | chr1:96230609-96261024   | + | 464  |
| OTTHUMG00000010690 | OTTHUMT00000029470 | chr1:96492213-96612269   | - | 1988 |
| OTTHUMG00000010681 | OTTHUMT00000029438 | chr1:98448891-98510802   | + | 2226 |
| OTTHUMG00000010769 | OTTHUMT00000029680 | chr1:99710506-99772159   | - | 491  |
| OTTHUMG00000010984 | OTTHUMT00000030217 | chr1:100582621-100583386 | + | 465  |

|                    |                    |                          |   |      |
|--------------------|--------------------|--------------------------|---|------|
| OTTHUMG00000040491 | OTTHUMT00000097435 | chr1:100865193-100867088 | - | 372  |
| OTTHUMG00000010834 | OTTHUMT00000029907 | chr1:101561481-101588320 | + | 258  |
| OTTHUMG00000010834 | OTTHUMT00000029906 | chr1:101561981-101615457 | + | 469  |
| OTTHUMG00000010834 | OTTHUMT00000029905 | chr1:101588193-101628447 | + | 769  |
| OTTHUMG00000010944 | OTTHUMT00000030148 | chr1:101961886-101967758 | + | 476  |
| OTTHUMG00000010865 | OTTHUMT00000029981 | chr1:102437883-102627774 | - | 651  |
| OTTHUMG00000010873 | OTTHUMT00000030002 | chr1:103001466-103091986 | - | 924  |
| OTTHUMG00000041346 | OTTHUMT00000099059 | chr1:103590357-103600943 | + | 416  |
| OTTHUMG00000041347 | OTTHUMT00000099060 | chr1:103593557-103608574 | - | 436  |
| OTTHUMG00000041347 | OTTHUMT00000099061 | chr1:103594232-103608574 | - | 352  |
| OTTHUMG00000041349 | OTTHUMT00000099064 | chr1:103730089-103740675 | + | 416  |
| OTTHUMG00000011003 | OTTHUMT00000030257 | chr1:105933839-105963063 | - | 406  |
| OTTHUMG00000011003 | OTTHUMT00000030256 | chr1:105946297-105963080 | - | 1822 |
| OTTHUMG00000011006 | OTTHUMT00000030260 | chr1:106271769-106297039 | - | 551  |
| OTTHUMG00000011006 | OTTHUMT00000030357 | chr1:106271769-106367357 | - | 455  |
| OTTHUMG00000011006 | OTTHUMT00000030261 | chr1:106271770-106297634 | - | 373  |
| OTTHUMG00000000497 | OTTHUMT00000001239 | chr1:107162384-107182338 | + | 731  |
| OTTHUMG00000011012 | OTTHUMT00000030278 | chr1:108415627-108418664 | + | 429  |
| OTTHUMG00000011012 | OTTHUMT00000030279 | chr1:108416516-108418638 | + | 426  |
| OTTHUMG00000011637 | OTTHUMT00000032165 | chr1:110172500-110215581 | + | 472  |
| OTTHUMG00000011641 | OTTHUMT00000032186 | chr1:110228321-110230409 | - | 448  |
| OTTHUMG00000040850 | OTTHUMT00000098110 | chr1:110552979-110554132 | - | 746  |
| OTTHUMG00000040851 | OTTHUMT00000098111 | chr1:110626679-110627245 | + | 219  |
| OTTHUMG00000012183 | OTTHUMT00000033693 | chr1:112521379-112704673 | - | 545  |
| OTTHUMG00000012022 | OTTHUMT00000033259 | chr1:113164315-113193960 | - | 763  |
| OTTHUMG00000012022 | OTTHUMT00000033258 | chr1:113164319-113194788 | - | 1812 |
| OTTHUMG00000012022 | OTTHUMT00000033532 | chr1:113164435-113193924 | - | 699  |
| OTTHUMG00000012023 | OTTHUMT00000033261 | chr1:113194173-113222016 | + | 584  |
| OTTHUMG00000012023 | OTTHUMT00000033260 | chr1:113194221-113222012 | + | 488  |
| OTTHUMG00000012131 | OTTHUMT00000033546 | chr1:113352399-113391200 | + | 375  |
| OTTHUMG00000012131 | OTTHUMT00000033547 | chr1:113377818-113391200 | + | 434  |
| OTTHUMG00000011899 | OTTHUMT00000032873 | chr1:114550572-114606423 | + | 330  |
| OTTHUMG00000011879 | OTTHUMT00000032831 | chr1:115443816-115446802 | + | 489  |
| OTTHUMG00000012009 | OTTHUMT00000033222 | chr1:116263520-116270052 | + | 1393 |
| OTTHUMG00000012112 | OTTHUMT00000033488 | chr1:116508428-116510385 | + | 912  |
| OTTHUMG00000014035 | OTTHUMT00000039476 | chr1:116767869-116822953 | - | 450  |
| OTTHUMG00000014035 | OTTHUMT00000097629 | chr1:116796791-116822987 | - | 617  |
| OTTHUMG00000014035 | OTTHUMT00000097634 | chr1:116797179-116810587 | - | 536  |
| OTTHUMG00000014035 | OTTHUMT00000097630 | chr1:116797180-116822372 | - | 458  |
| OTTHUMG00000014035 | OTTHUMT00000097631 | chr1:116797180-116822971 | - | 432  |
| OTTHUMG00000014035 | OTTHUMT00000097635 | chr1:116807866-116810597 | - | 478  |
| OTTHUMG00000019417 | OTTHUMT00000051445 | chr1:116837168-116843357 | - | 2293 |
| OTTHUMG00000012147 | OTTHUMT00000033591 | chr1:117639665-117665481 | + | 508  |
| OTTHUMG00000012337 | OTTHUMT00000034368 | chr1:119344490-119345538 | - | 651  |
| OTTHUMG00000012338 | OTTHUMT00000034371 | chr1:119344764-119345551 | - | 408  |

|                    |                     |                          |   |      |
|--------------------|---------------------|--------------------------|---|------|
| OTTHUMG00000012411 | OTTHUMT00000034533  | chr1:119604411-119671449 | - | 895  |
| OTTHUMG00000012409 | OTTHUMT00000034531  | chr1:119672322-119674961 | + | 439  |
| OTTHUMG00000012409 | OTTHUMT00000034530  | chr1:119672398-119700328 | + | 387  |
| OTTHUMG00000013092 | OTTHUMT00000036739  | chr1:120840137-120906506 | + | 3660 |
| OTTHUMG00000013086 | OTTHUMT00000036733  | chr1:120868446-120872657 | + | 493  |
| OTTHUMG00000013087 | OTTHUMT00000036734  | chr1:121017267-121023845 | - | 424  |
| OTTHUMG00000013089 | OTTHUMT00000036736  | chr1:141494816-141500693 | + | 962  |
| OTTHUMG00000013378 | OTTHUMT00000037256  | chr1:141510789-141529757 | - | 359  |
| OTTHUMG00000085417 | OTTHUMT000000193207 | chr1:141892358-141898239 | - | 964  |
| OTTHUMG00000013472 | OTTHUMT00000037571  | chr1:141960227-142035865 | - | 695  |
| OTTHUMG00000013471 | OTTHUMT00000037563  | chr1:141960584-141999600 | + | 1227 |
| OTTHUMG00000013471 | OTTHUMT00000037562  | chr1:141960584-142047620 | + | 549  |
| OTTHUMG00000013471 | OTTHUMT00000037559  | chr1:141960584-142073279 | + | 651  |
| OTTHUMG00000013471 | OTTHUMT00000037561  | chr1:141960584-142073841 | + | 611  |
| OTTHUMG00000013471 | OTTHUMT00000037560  | chr1:141960584-142074940 | + | 1782 |
| OTTHUMG00000013474 | OTTHUMT00000037573  | chr1:141996016-142011483 | + | 846  |
| OTTHUMG00000013472 | OTTHUMT00000037564  | chr1:142025399-142035762 | - | 1883 |
| OTTHUMG00000013472 | OTTHUMT00000037565  | chr1:142028285-142038326 | - | 1102 |
| OTTHUMG00000013472 | OTTHUMT00000037568  | chr1:142030032-142037357 | - | 552  |
| OTTHUMG00000013472 | OTTHUMT00000037566  | chr1:142030318-142038326 | - | 1406 |
| OTTHUMG00000013473 | OTTHUMT00000037572  | chr1:142030351-142031218 | + | 468  |
| OTTHUMG00000013472 | OTTHUMT00000037567  | chr1:142030957-142052593 | - | 2497 |
| OTTHUMG00000013472 | OTTHUMT00000037569  | chr1:142035412-142037409 | - | 659  |
| OTTHUMG00000013472 | OTTHUMT00000037570  | chr1:142035425-142038326 | - | 721  |
| OTTHUMG00000013469 | OTTHUMT00000037545  | chr1:142189481-142206564 | + | 506  |
| OTTHUMG00000013469 | OTTHUMT00000037544  | chr1:142189493-142218222 | + | 932  |
| OTTHUMG00000013469 | OTTHUMT00000037546  | chr1:142189502-142193006 | + | 306  |
| OTTHUMG00000013469 | OTTHUMT00000037547  | chr1:142190263-142193006 | + | 356  |
| OTTHUMG00000013470 | OTTHUMT00000037552  | chr1:142196486-142306961 | - | 1785 |
| OTTHUMG00000013469 | OTTHUMT00000037542  | chr1:142196785-142221426 | + | 2600 |
| OTTHUMG00000013470 | OTTHUMT00000037553  | chr1:142197588-142309055 | - | 677  |
| OTTHUMG00000013470 | OTTHUMT00000037551  | chr1:142198148-142308827 | - | 1109 |
| OTTHUMG00000013469 | OTTHUMT00000037548  | chr1:142203231-142218260 | + | 770  |
| OTTHUMG00000013469 | OTTHUMT00000037543  | chr1:142203497-142213839 | + | 332  |
| OTTHUMG00000013469 | OTTHUMT00000037549  | chr1:142203500-142216696 | + | 350  |
| OTTHUMG00000013469 | OTTHUMT00000037550  | chr1:142203514-142209713 | + | 275  |
| OTTHUMG00000013630 | OTTHUMT00000037971  | chr1:142218804-142240412 | + | 2489 |
| OTTHUMG00000013630 | OTTHUMT00000037978  | chr1:142220259-142222487 | + | 677  |
| OTTHUMG00000013470 | OTTHUMT00000037554  | chr1:142223768-142309155 | - | 1334 |
| OTTHUMG00000013630 | OTTHUMT00000037975  | chr1:142233049-142233627 | + | 370  |
| OTTHUMG00000013630 | OTTHUMT00000037976  | chr1:142233091-142235967 | + | 734  |
| OTTHUMG00000013630 | OTTHUMT00000037973  | chr1:142233091-142241051 | + | 1406 |
| OTTHUMG00000013630 | OTTHUMT00000037974  | chr1:142233091-142241336 | + | 497  |
| OTTHUMG00000013630 | OTTHUMT00000037970  | chr1:142233091-142243056 | + | 1102 |
| OTTHUMG00000013630 | OTTHUMT00000037979  | chr1:142233966-142241337 | + | 385  |

|                    |                    |                          |   |      |
|--------------------|--------------------|--------------------------|---|------|
| OTTHUMG00000013630 | OTTHUMT00000037977 | chr1:142233973-142235967 | + | 659  |
| OTTHUMG00000013630 | OTTHUMT00000037972 | chr1:142235617-142245938 | + | 1882 |
| OTTHUMG00000013630 | OTTHUMT00000037980 | chr1:142235674-142241337 | + | 288  |
| OTTHUMG00000013470 | OTTHUMT00000037558 | chr1:142240935-142309181 | - | 780  |
| OTTHUMG00000013470 | OTTHUMT00000037555 | chr1:142271395-142309167 | - | 1301 |
| OTTHUMG00000013470 | OTTHUMT00000037557 | chr1:142306168-142309136 | - | 835  |
| OTTHUMG00000013470 | OTTHUMT00000037556 | chr1:142306903-142309127 | - | 298  |
| OTTHUMG00000013631 | OTTHUMT00000037981 | chr1:142339867-142358822 | + | 358  |
| OTTHUMG00000013632 | OTTHUMT00000037982 | chr1:142368928-142374795 | - | 961  |
| OTTHUMG00000013632 | OTTHUMT00000037983 | chr1:142369408-142370746 | - | 303  |
| OTTHUMG00000042242 | OTTHUMT00000100473 | chr1:144084411-144086911 | - | 664  |
| OTTHUMG00000042244 | OTTHUMT00000100475 | chr1:144087482-144093754 | - | 811  |
| OTTHUMG00000042244 | OTTHUMT00000100477 | chr1:144087524-144089129 | - | 645  |
| OTTHUMG00000042244 | OTTHUMT00000100476 | chr1:144087684-144093719 | - | 868  |
| OTTHUMG00000042244 | OTTHUMT00000100478 | chr1:144088423-144089406 | - | 370  |
| OTTHUMG00000013881 | OTTHUMT00000038921 | chr1:144837900-144870459 | - | 858  |
| OTTHUMG00000043709 | OTTHUMT00000102088 | chr1:144940123-144941802 | - | 724  |
| OTTHUMG00000043709 | OTTHUMT00000102089 | chr1:144940359-144941367 | - | 591  |
| OTTHUMG00000041476 | OTTHUMT00000099377 | chr1:145452782-145456323 | - | 698  |
| OTTHUMG00000042022 | OTTHUMT00000100088 | chr1:145636538-145638085 | + | 444  |
| OTTHUMG00000042020 | OTTHUMT00000100086 | chr1:145716324-145727689 | + | 478  |
| OTTHUMG00000043433 | OTTHUMT00000101759 | chr1:145960714-145964796 | + | 491  |
| OTTHUMG00000043433 | OTTHUMT00000101760 | chr1:145963300-145964796 | + | 437  |
| OTTHUMG00000017423 | OTTHUMT00000046023 | chr1:147194946-147199544 | + | 197  |
| OTTHUMG00000017423 | OTTHUMT00000046024 | chr1:147194946-147218218 | + | 546  |
| OTTHUMG00000017423 | OTTHUMT00000046025 | chr1:147194955-147199992 | + | 265  |
| OTTHUMG00000017423 | OTTHUMT00000097809 | chr1:147199409-147200203 | + | 423  |
| OTTHUMG00000041570 | OTTHUMT00000099548 | chr1:147452927-147453997 | + | 903  |
| OTTHUMG00000041573 | OTTHUMT00000099556 | chr1:147497340-147499178 | + | 1071 |
| OTTHUMG00000041568 | OTTHUMT00000099630 | chr1:147551269-147553599 | + | 473  |
| OTTHUMG00000041568 | OTTHUMT00000099546 | chr1:147551269-147553730 | + | 692  |
| OTTHUMG00000041633 | OTTHUMT00000099634 | chr1:147572534-147579700 | - | 534  |
| OTTHUMG00000041032 | OTTHUMT00000098435 | chr1:147638916-147646270 | - | 3538 |
| OTTHUMG00000013949 | OTTHUMT00000039131 | chr1:147843215-147843920 | - | 559  |
| OTTHUMG00000013950 | OTTHUMT00000039132 | chr1:147857376-147858386 | - | 396  |
| OTTHUMG00000013953 | OTTHUMT00000039135 | chr1:147939621-147943911 | + | 1986 |
| OTTHUMG00000013955 | OTTHUMT00000039137 | chr1:147958056-147965229 | - | 534  |
| OTTHUMG00000035849 | OTTHUMT00000087261 | chr1:148754857-148757132 | + | 564  |
| OTTHUMG00000012244 | OTTHUMT00000034017 | chr1:150444958-150446157 | + | 395  |
| OTTHUMG00000012386 | OTTHUMT00000034506 | chr1:150894577-150895904 | + | 299  |
| OTTHUMG00000012449 | OTTHUMT00000034662 | chr1:151169140-151188310 | - | 1995 |
| OTTHUMG00000013934 | OTTHUMT00000039103 | chr1:151413618-151430776 | + | 2251 |
| OTTHUMG00000017459 | OTTHUMT00000046191 | chr1:154227805-154238202 | + | 399  |
| OTTHUMG00000017460 | OTTHUMT00000046192 | chr1:154232738-154238979 | - | 427  |
| OTTHUMG00000031021 | OTTHUMT00000075987 | chr1:154624642-154632025 | + | 5584 |

|                    |                    |                          |   |      |
|--------------------|--------------------|--------------------------|---|------|
| OTTHUMG00000033094 | OTTHUMT00000080560 | chr1:154682828-154692882 | - | 519  |
| OTTHUMG00000033094 | OTTHUMT00000080561 | chr1:154689313-154692993 | - | 672  |
| OTTHUMG00000041297 | OTTHUMT00000098960 | chr1:154924113-154928413 | - | 4118 |
| OTTHUMG00000041299 | OTTHUMT00000098965 | chr1:154948628-154949590 | - | 431  |
| OTTHUMG00000041327 | OTTHUMT00000099026 | chr1:155421802-155423819 | + | 469  |
| OTTHUMG00000017482 | OTTHUMT00000046272 | chr1:155468645-155473550 | - | 397  |
| OTTHUMG00000017483 | OTTHUMT00000046273 | chr1:155524117-155524467 | - | 154  |
| OTTHUMG00000022441 | OTTHUMT00000058349 | chr1:156368458-156377044 | - | 645  |
| OTTHUMG00000022441 | OTTHUMT00000058348 | chr1:156368458-156377053 | - | 831  |
| OTTHUMG00000022444 | OTTHUMT00000058352 | chr1:156434336-156440291 | - | 1997 |
| OTTHUMG00000022736 | OTTHUMT00000059019 | chr1:157702735-157719790 | + | 850  |
| OTTHUMG00000024077 | OTTHUMT00000060639 | chr1:158197632-158213526 | + | 801  |
| OTTHUMG00000024077 | OTTHUMT00000060638 | chr1:158197638-158215475 | + | 1110 |
| OTTHUMG00000028600 | OTTHUMT00000071456 | chr1:159168153-159170794 | - | 573  |
| OTTHUMG00000043773 | OTTHUMT00000102153 | chr1:159792704-159793492 | - | 460  |
| OTTHUMG00000034467 | OTTHUMT00000083315 | chr1:159874062-159874842 | - | 460  |
| OTTHUMG00000024048 | OTTHUMT00000060554 | chr1:160275430-160275981 | + | 451  |
| OTTHUMG00000033149 | OTTHUMT00000080770 | chr1:161496264-161497073 | + | 467  |
| OTTHUMG00000034564 | OTTHUMT00000083637 | chr1:163834324-163859192 | + | 488  |
| OTTHUMG00000034556 | OTTHUMT00000096761 | chr1:164570745-164571623 | + | 420  |
| OTTHUMG00000033265 | OTTHUMT00000081455 | chr1:164623588-164688493 | - | 807  |
| OTTHUMG00000034319 | OTTHUMT00000082879 | chr1:165131572-165143941 | - | 559  |
| OTTHUMG00000034431 | OTTHUMT00000083235 | chr1:165411778-165431650 | - | 966  |
| OTTHUMG00000034431 | OTTHUMT00000083236 | chr1:165411935-165431341 | - | 927  |
| OTTHUMG00000034431 | OTTHUMT00000083238 | chr1:165412082-165431609 | - | 902  |
| OTTHUMG00000034431 | OTTHUMT00000083237 | chr1:165412208-165431653 | - | 852  |
| OTTHUMG00000034644 | OTTHUMT00000083820 | chr1:166636691-166658518 | - | 1797 |
| OTTHUMG00000034644 | OTTHUMT00000097958 | chr1:166637345-166643136 | - | 386  |
| OTTHUMG00000040769 | OTTHUMT00000097974 | chr1:166700076-166731506 | - | 514  |
| OTTHUMG00000034550 | OTTHUMT00000083614 | chr1:166999227-167010352 | - | 416  |
| OTTHUMG00000034551 | OTTHUMT00000083615 | chr1:167022801-167028748 | + | 952  |
| OTTHUMG00000034591 | OTTHUMT00000083698 | chr1:167339986-167340769 | + | 566  |
| OTTHUMG00000035449 | OTTHUMT00000086102 | chr1:167678500-167696314 | - | 1485 |
| OTTHUMG00000035449 | OTTHUMT00000086103 | chr1:167690253-167696283 | - | 424  |
| OTTHUMG00000035812 | OTTHUMT00000087108 | chr1:167998694-168000413 | - | 675  |
| OTTHUMG00000035969 | OTTHUMT00000087599 | chr1:168507368-168514697 | - | 1454 |
| OTTHUMG00000035969 | OTTHUMT00000087600 | chr1:168507532-168519973 | - | 385  |
| OTTHUMG00000035229 | OTTHUMT00000085233 | chr1:168823014-168824001 | - | 128  |
| OTTHUMG00000035230 | OTTHUMT00000085234 | chr1:168834619-168883104 | + | 1920 |
| OTTHUMG00000034834 | OTTHUMT00000084267 | chr1:171142663-171143447 | + | 656  |
| OTTHUMG00000034840 | OTTHUMT00000084275 | chr1:171410062-171411265 | - | 688  |
| OTTHUMG00000034807 | OTTHUMT00000084227 | chr1:171653555-171697124 | - | 1813 |
| OTTHUMG00000034807 | OTTHUMT00000084228 | chr1:171653836-171677859 | - | 1013 |
| OTTHUMG00000037217 | OTTHUMT00000090606 | chr1:172097913-172099702 | + | 851  |
| OTTHUMG00000034823 | OTTHUMT00000084254 | chr1:172245028-172251967 | - | 446  |

|                    |                    |                          |   |      |
|--------------------|--------------------|--------------------------|---|------|
| OTTHUMG00000034820 | OTTHUMT00000084248 | chr1:172258270-172258746 | + | 333  |
| OTTHUMG00000034947 | OTTHUMT00000084593 | chr1:173438987-173440608 | - | 773  |
| OTTHUMG00000034985 | OTTHUMT00000084671 | chr1:174140521-174156272 | - | 654  |
| OTTHUMG00000040861 | OTTHUMT00000098153 | chr1:175587345-175602031 | + | 487  |
| OTTHUMG00000040862 | OTTHUMT00000098154 | chr1:175629046-175812707 | - | 795  |
| OTTHUMG00000040862 | OTTHUMT00000098155 | chr1:175629438-175833467 | - | 542  |
| OTTHUMG00000040863 | OTTHUMT00000098156 | chr1:175936282-175946088 | + | 1662 |
| OTTHUMG00000035264 | OTTHUMT00000085303 | chr1:178065367-178071882 | - | 351  |
| OTTHUMG00000035112 | OTTHUMT00000084991 | chr1:178794735-178802277 | + | 1486 |
| OTTHUMG00000035182 | OTTHUMT00000085150 | chr1:179142410-179144925 | + | 539  |
| OTTHUMG00000035182 | OTTHUMT00000085149 | chr1:179143560-179144701 | + | 440  |
| OTTHUMG00000035180 | OTTHUMT00000085146 | chr1:179410243-179417967 | + | 539  |
| OTTHUMG00000035180 | OTTHUMT00000085147 | chr1:179411096-179417966 | + | 538  |
| OTTHUMG00000035181 | OTTHUMT00000085148 | chr1:179426230-179426908 | - | 530  |
| OTTHUMG00000035177 | OTTHUMT00000085141 | chr1:179472147-179474363 | + | 256  |
| OTTHUMG00000037300 | OTTHUMT00000090790 | chr1:180322309-180325870 | + | 1142 |
| OTTHUMG00000037400 | OTTHUMT00000091034 | chr1:180363055-180364423 | - | 625  |
| OTTHUMG00000041043 | OTTHUMT00000098468 | chr1:180948620-180950302 | + | 257  |
| OTTHUMG00000035458 | OTTHUMT00000086125 | chr1:182564828-182568583 | + | 331  |
| OTTHUMG00000035578 | OTTHUMT00000086351 | chr1:183794134-183801386 | + | 613  |
| OTTHUMG00000035577 | OTTHUMT00000086350 | chr1:183842939-183864282 | - | 637  |
| OTTHUMG00000035513 | OTTHUMT00000086238 | chr1:185328597-185596078 | + | 854  |
| OTTHUMG00000035479 | OTTHUMT00000086169 | chr1:185679361-185705994 | + | 288  |
| OTTHUMG00000035479 | OTTHUMT00000086170 | chr1:185679383-185712977 | + | 421  |
| OTTHUMG00000035627 | OTTHUMT00000086449 | chr1:186744292-186772219 | + | 742  |
| OTTHUMG00000035544 | OTTHUMT00000086293 | chr1:186941377-186946634 | - | 731  |
| OTTHUMG00000035545 | OTTHUMT00000086294 | chr1:187105231-187123188 | - | 464  |
| OTTHUMG00000035542 | OTTHUMT00000086291 | chr1:187141442-187273016 | + | 782  |
| OTTHUMG00000035526 | OTTHUMT00000086267 | chr1:188011218-188050671 | + | 447  |
| OTTHUMG00000035527 | OTTHUMT00000086268 | chr1:188103754-188104281 | - | 412  |
| OTTHUMG00000040635 | OTTHUMT00000097707 | chr1:188716132-188730050 | + | 504  |
| OTTHUMG00000041127 | OTTHUMT00000098604 | chr1:189456912-189464220 | + | 297  |
| OTTHUMG00000041126 | OTTHUMT00000098602 | chr1:190094460-190102713 | - | 613  |
| OTTHUMG00000041126 | OTTHUMT00000098603 | chr1:190094516-190125982 | - | 581  |
| OTTHUMG00000041131 | OTTHUMT00000098608 | chr1:190111248-190247013 | + | 2030 |
| OTTHUMG00000041135 | OTTHUMT00000098612 | chr1:190753392-190802970 | - | 394  |
| OTTHUMG00000041136 | OTTHUMT00000098613 | chr1:190765332-190773855 | + | 681  |
| OTTHUMG00000041137 | OTTHUMT00000098614 | chr1:191173053-191184010 | - | 274  |
| OTTHUMG00000035686 | OTTHUMT00000086758 | chr1:191540498-191601706 | + | 775  |
| OTTHUMG00000035690 | OTTHUMT00000086762 | chr1:191914647-191962936 | + | 546  |
| OTTHUMG00000035685 | OTTHUMT00000086757 | chr1:191919999-191924182 | - | 847  |
| OTTHUMG00000035603 | OTTHUMT00000086407 | chr1:192586696-192588179 | + | 438  |
| OTTHUMG00000035609 | OTTHUMT00000086414 | chr1:194280749-194296826 | - | 619  |
| OTTHUMG00000035655 | OTTHUMT00000086543 | chr1:196833477-196834621 | - | 361  |
| OTTHUMG00000035888 | OTTHUMT00000087435 | chr1:197043245-197062968 | - | 940  |

|                    |                     |                          |   |      |
|--------------------|---------------------|--------------------------|---|------|
| OTTHUMG00000035888 | OTTHUMT00000087434  | chr1:197043410-197173162 | - | 927  |
| OTTHUMG00000035888 | OTTHUMT00000087436  | chr1:197135770-197173181 | - | 754  |
| OTTHUMG00000035890 | OTTHUMT00000087438  | chr1:197219073-197220953 | + | 832  |
| OTTHUMG00000035890 | OTTHUMT00000087439  | chr1:197219376-197221152 | + | 914  |
| OTTHUMG00000035892 | OTTHUMT00000087441  | chr1:197241792-197256789 | - | 1782 |
| OTTHUMG00000035893 | OTTHUMT00000087442  | chr1:197251885-197312487 | + | 659  |
| OTTHUMG00000035719 | OTTHUMT00000086874  | chr1:198709671-198714044 | + | 505  |
| OTTHUMG00000035782 | OTTHUMT00000087047  | chr1:199158442-199202419 | + | 2542 |
| OTTHUMG00000035782 | OTTHUMT000000331146 | chr1:199194578-199202261 | + | 547  |
| OTTHUMG00000041399 | OTTHUMT00000099181  | chr1:201046713-201047664 | + | 746  |
| OTTHUMG00000041399 | OTTHUMT00000099182  | chr1:201046713-201047664 | + | 632  |
| OTTHUMG00000041380 | OTTHUMT00000099140  | chr1:201056017-201062976 | + | 2807 |
| OTTHUMG00000041219 | OTTHUMT00000098768  | chr1:201522903-201524552 | + | 772  |
| OTTHUMG00000041219 | OTTHUMT00000098769  | chr1:201523521-201524285 | + | 351  |
| OTTHUMG00000037202 | OTTHUMT00000090406  | chr1:203691680-203704775 | + | 2882 |
| OTTHUMG00000036117 | OTTHUMT00000087994  | chr1:204330707-204332893 | + | 269  |
| OTTHUMG00000036254 | OTTHUMT00000088207  | chr1:205489035-205549089 | + | 913  |
| OTTHUMG00000036552 | OTTHUMT00000088900  | chr1:206113763-206119041 | - | 562  |
| OTTHUMG00000036136 | OTTHUMT00000088025  | chr1:206968656-206973152 | + | 523  |
| OTTHUMG00000036137 | OTTHUMT00000088026  | chr1:207212422-207215275 | + | 593  |
| OTTHUMG00000036133 | OTTHUMT00000088022  | chr1:207387235-207395069 | - | 470  |
| OTTHUMG00000036265 | OTTHUMT00000088228  | chr1:207565424-207568500 | + | 489  |
| OTTHUMG00000036266 | OTTHUMT00000088229  | chr1:207607630-207619658 | + | 722  |
| OTTHUMG00000036266 | OTTHUMT00000088230  | chr1:207612023-207613527 | + | 324  |
| OTTHUMG00000036359 | OTTHUMT00000088523  | chr1:207768423-207807641 | - | 858  |
| OTTHUMG00000036359 | OTTHUMT00000088524  | chr1:207768509-207787548 | - | 635  |
| OTTHUMG00000041139 | OTTHUMT00000098617  | chr1:209422121-209423069 | - | 114  |
| OTTHUMG00000037001 | OTTHUMT00000089836  | chr1:209875871-209882832 | + | 583  |
| OTTHUMG00000036999 | OTTHUMT00000089833  | chr1:209879660-209894546 | + | 1202 |
| OTTHUMG00000036999 | OTTHUMT00000089834  | chr1:209879773-209894141 | + | 354  |
| OTTHUMG00000037124 | OTTHUMT00000090163  | chr1:209926487-209930068 | + | 458  |
| OTTHUMG00000037125 | OTTHUMT00000090164  | chr1:209955893-209965367 | - | 172  |
| OTTHUMG00000037131 | OTTHUMT00000090178  | chr1:210408172-210430224 | + | 506  |
| OTTHUMG00000037132 | OTTHUMT00000090179  | chr1:210465243-210474511 | - | 334  |
| OTTHUMG00000037132 | OTTHUMT00000090180  | chr1:210465245-210466503 | - | 335  |
| OTTHUMG00000037132 | OTTHUMT00000090181  | chr1:210465245-210478942 | - | 359  |
| OTTHUMG00000036746 | OTTHUMT00000089295  | chr1:210706781-210707708 | - | 357  |
| OTTHUMG00000036749 | OTTHUMT00000089301  | chr1:210785659-210796030 | + | 329  |
| OTTHUMG00000036786 | OTTHUMT00000089347  | chr1:210893964-210905399 | - | 470  |
| OTTHUMG00000041155 | OTTHUMT00000098642  | chr1:211732267-211786413 | + | 438  |
| OTTHUMG00000041157 | OTTHUMT00000098644  | chr1:211971382-212034553 | + | 345  |
| OTTHUMG00000036947 | OTTHUMT00000089728  | chr1:212059601-212206231 | - | 3296 |
| OTTHUMG00000036947 | OTTHUMT00000089729  | chr1:212080694-212206224 | - | 492  |
| OTTHUMG00000041154 | OTTHUMT00000098641  | chr1:212205860-212226119 | + | 474  |
| OTTHUMG00000039497 | OTTHUMT00000095287  | chr1:216132866-216160769 | + | 1582 |



|                    |                    |                          |   |      |
|--------------------|--------------------|--------------------------|---|------|
| OTTHUMG00000039495 | OTTHUMT00000095285 | chr1:216271800-216273625 | + | 213  |
| OTTHUMG00000039496 | OTTHUMT00000095286 | chr1:216283470-216299105 | + | 1724 |
| OTTHUMG00000041229 | OTTHUMT00000098810 | chr1:217152722-217156149 | - | 387  |
| OTTHUMG00000037143 | OTTHUMT00000090219 | chr1:217462213-217465462 | - | 1124 |
| OTTHUMG00000041231 | OTTHUMT00000098812 | chr1:217649646-217651906 | - | 809  |
| OTTHUMG00000041230 | OTTHUMT00000098811 | chr1:217675117-217682607 | - | 448  |
| OTTHUMG00000041227 | OTTHUMT00000098808 | chr1:217797157-217797666 | + | 180  |
| OTTHUMG00000037358 | OTTHUMT00000090919 | chr1:218599696-218600148 | - | 243  |
| OTTHUMG00000037350 | OTTHUMT00000090897 | chr1:218725069-218727008 | - | 388  |
| OTTHUMG00000037355 | OTTHUMT00000090916 | chr1:219069220-219072394 | + | 958  |
| OTTHUMG00000037165 | OTTHUMT00000090308 | chr1:219748524-219750944 | + | 805  |
| OTTHUMG00000037268 | OTTHUMT00000090715 | chr1:220067631-220080631 | - | 419  |
| OTTHUMG00000037423 | OTTHUMT00000091109 | chr1:220120946-220158677 | - | 715  |
| OTTHUMG00000037423 | OTTHUMT00000091110 | chr1:220153613-220218488 | - | 601  |
| OTTHUMG00000037424 | OTTHUMT00000091112 | chr1:220206306-220223108 | + | 452  |
| OTTHUMG00000037424 | OTTHUMT00000091111 | chr1:220206375-220224929 | + | 1145 |
| OTTHUMG00000037425 | OTTHUMT00000091113 | chr1:220281670-220304728 | - | 559  |
| OTTHUMG00000037291 | OTTHUMT00000090768 | chr1:220692705-220694670 | - | 313  |
| OTTHUMG00000037767 | OTTHUMT00000092152 | chr1:221054987-221077349 | + | 540  |
| OTTHUMG00000037767 | OTTHUMT00000092505 | chr1:221055002-221077304 | + | 553  |
| OTTHUMG00000037767 | OTTHUMT00000092153 | chr1:221055012-221077194 | + | 380  |
| OTTHUMG00000037767 | OTTHUMT00000092154 | chr1:221055016-221077349 | + | 358  |
| OTTHUMG00000037767 | OTTHUMT00000092501 | chr1:221055025-221077347 | + | 762  |
| OTTHUMG00000037767 | OTTHUMT00000092503 | chr1:221055026-221077349 | + | 574  |
| OTTHUMG00000037767 | OTTHUMT00000100398 | chr1:221055040-221067276 | + | 128  |
| OTTHUMG00000037767 | OTTHUMT00000092499 | chr1:221055043-221077348 | + | 512  |
| OTTHUMG00000037767 | OTTHUMT00000092500 | chr1:221055076-221067547 | + | 214  |
| OTTHUMG00000037767 | OTTHUMT00000092504 | chr1:221055094-221077265 | + | 442  |
| OTTHUMG00000037767 | OTTHUMT00000092502 | chr1:221063849-221077349 | + | 545  |
| OTTHUMG00000037767 | OTTHUMT00000092506 | chr1:221070945-221077349 | + | 546  |
| OTTHUMG00000037935 | OTTHUMT00000092591 | chr1:221421109-221428119 | + | 484  |
| OTTHUMG00000037537 | OTTHUMT00000091468 | chr1:222463072-222464737 | - | 435  |
| OTTHUMG00000037537 | OTTHUMT00000091467 | chr1:222463072-222467604 | - | 788  |
| OTTHUMG00000037716 | OTTHUMT00000092017 | chr1:223021225-223027666 | + | 421  |
| OTTHUMG00000037519 | OTTHUMT00000091396 | chr1:223701568-223719668 | - | 395  |
| OTTHUMG00000037519 | OTTHUMT00000091397 | chr1:223702316-223719608 | - | 654  |
| OTTHUMG00000037739 | OTTHUMT00000092057 | chr1:223954929-224006568 | + | 1527 |
| OTTHUMG00000037740 | OTTHUMT00000092058 | chr1:223965293-223990599 | - | 531  |
| OTTHUMG00000041341 | OTTHUMT00000099052 | chr1:224341205-224344616 | + | 404  |
| OTTHUMG00000037610 | OTTHUMT00000091687 | chr1:225764920-225774801 | - | 613  |
| OTTHUMG00000041351 | OTTHUMT00000099069 | chr1:227295185-227297275 | - | 597  |
| OTTHUMG00000037661 | OTTHUMT00000091837 | chr1:227425831-227429932 | - | 790  |
| OTTHUMG00000039465 | OTTHUMT00000095234 | chr1:228077920-228088122 | - | 383  |
| OTTHUMG00000037758 | OTTHUMT00000092103 | chr1:228205100-228209532 | + | 652  |
| OTTHUMG00000037760 | OTTHUMT00000092105 | chr1:228795029-228797952 | + | 401  |

|                    |                    |                          |   |      |
|--------------------|--------------------|--------------------------|---|------|
| OTTHUMG00000037789 | OTTHUMT00000092235 | chr1:229026010-229027076 | - | 309  |
| OTTHUMG00000037791 | OTTHUMT00000092238 | chr1:229077215-229081384 | + | 791  |
| OTTHUMG00000039488 | OTTHUMT00000095276 | chr1:229793661-229814459 | - | 595  |
| OTTHUMG00000037849 | OTTHUMT00000092379 | chr1:230362460-230388012 | + | 815  |
| OTTHUMG00000037832 | OTTHUMT00000092348 | chr1:230377301-230382482 | - | 2239 |
| OTTHUMG00000037848 | OTTHUMT00000092378 | chr1:230513861-230515480 | + | 1080 |
| OTTHUMG00000037823 | OTTHUMT00000092332 | chr1:230920440-230924619 | + | 369  |
| OTTHUMG00000037825 | OTTHUMT00000092334 | chr1:230929623-230945084 | - | 2038 |
| OTTHUMG00000037976 | OTTHUMT00000092696 | chr1:232730260-232734148 | - | 2857 |
| OTTHUMG00000037976 | OTTHUMT00000092697 | chr1:232732311-232734134 | - | 802  |
| OTTHUMG00000037977 | OTTHUMT00000092698 | chr1:232767667-232772457 | + | 388  |
| OTTHUMG00000037979 | OTTHUMT00000092700 | chr1:232831680-232837149 | + | 2268 |
| OTTHUMG00000037980 | OTTHUMT00000092701 | chr1:232848658-232863293 | + | 1369 |
| OTTHUMG00000037980 | OTTHUMT00000092702 | chr1:232858494-232883491 | + | 419  |
| OTTHUMG00000037982 | OTTHUMT00000092707 | chr1:232862640-232869473 | + | 930  |
| OTTHUMG00000037983 | OTTHUMT00000092708 | chr1:232871892-232898523 | - | 3562 |
| OTTHUMG00000037980 | OTTHUMT00000092703 | chr1:232876465-232885545 | + | 628  |
| OTTHUMG00000038016 | OTTHUMT00000092804 | chr1:232911628-232918384 | + | 2532 |
| OTTHUMG00000038016 | OTTHUMT00000092805 | chr1:232911758-232922346 | + | 1004 |
| OTTHUMG00000038017 | OTTHUMT00000092806 | chr1:232927771-232934013 | + | 3572 |
| OTTHUMG00000038015 | OTTHUMT00000092803 | chr1:233159601-233162359 | + | 421  |
| OTTHUMG00000038014 | OTTHUMT00000092798 | chr1:233159712-233166369 | - | 885  |
| OTTHUMG00000038014 | OTTHUMT00000092799 | chr1:233162031-233166197 | - | 315  |
| OTTHUMG00000038014 | OTTHUMT00000092800 | chr1:233162033-233165558 | - | 551  |
| OTTHUMG00000038014 | OTTHUMT00000092802 | chr1:233162036-233172432 | - | 423  |
| OTTHUMG00000038014 | OTTHUMT00000092801 | chr1:233163746-233165496 | - | 357  |
| OTTHUMG00000041431 | OTTHUMT00000099241 | chr1:234172476-234173728 | - | 738  |
| OTTHUMG00000041435 | OTTHUMT00000099245 | chr1:234187802-234201748 | - | 188  |
| OTTHUMG00000041437 | OTTHUMT00000099247 | chr1:236505960-236516939 | + | 195  |
| OTTHUMG00000039532 | OTTHUMT00000095377 | chr1:236710307-236715946 | - | 1535 |
| OTTHUMG00000039564 | OTTHUMT00000095448 | chr1:237499648-237527860 | - | 446  |
| OTTHUMG00000040503 | OTTHUMT00000097470 | chr1:238969352-238973534 | - | 444  |
| OTTHUMG00000039598 | OTTHUMT00000095491 | chr1:239654215-239663251 | + | 501  |
| OTTHUMG00000039598 | OTTHUMT00000095492 | chr1:239654321-239663415 | + | 471  |
| OTTHUMG00000039859 | OTTHUMT00000096158 | chr1:241235770-241237393 | - | 789  |
| OTTHUMG00000039860 | OTTHUMT00000096159 | chr1:241259437-241277750 | - | 621  |
| OTTHUMG00000039860 | OTTHUMT00000096160 | chr1:241261197-241277794 | - | 472  |
| OTTHUMG00000039860 | OTTHUMT00000096161 | chr1:241268839-241278449 | - | 820  |
| OTTHUMG00000039860 | OTTHUMT00000096162 | chr1:241277662-241282177 | - | 344  |
| OTTHUMG00000039861 | OTTHUMT00000096167 | chr1:241285754-241287788 | - | 1712 |
| OTTHUMG00000039861 | OTTHUMT00000096163 | chr1:241286239-241331669 | - | 3816 |
| OTTHUMG00000039861 | OTTHUMT00000096164 | chr1:241286801-241287773 | - | 322  |
| OTTHUMG00000039861 | OTTHUMT00000096166 | chr1:241286937-241287346 | - | 124  |
| OTTHUMG00000039861 | OTTHUMT00000096165 | chr1:241287156-241287772 | - | 522  |
| OTTHUMG00000039861 | OTTHUMT00000099304 | chr1:241296101-241296795 | - | 122  |

|                    |                    |                          |   |      |
|--------------------|--------------------|--------------------------|---|------|
| OTTHUMG00000039861 | OTTHUMT00000096175 | chr1:241308782-241312050 | - | 430  |
| OTTHUMG00000039861 | OTTHUMT00000096174 | chr1:241308913-241321439 | - | 481  |
| OTTHUMG00000039861 | OTTHUMT00000096171 | chr1:241317960-241322523 | - | 439  |
| OTTHUMG00000039861 | OTTHUMT00000096168 | chr1:241318053-241331643 | - | 668  |
| OTTHUMG00000039861 | OTTHUMT00000096173 | chr1:241321316-241322515 | - | 316  |
| OTTHUMG00000039861 | OTTHUMT00000096172 | chr1:241321391-241322483 | - | 362  |
| OTTHUMG00000039861 | OTTHUMT00000096170 | chr1:241325916-241327512 | - | 528  |
| OTTHUMG00000039861 | OTTHUMT00000096169 | chr1:241326799-241331658 | - | 772  |
| OTTHUMG00000040014 | OTTHUMT00000096514 | chr1:242147327-242277242 | + | 1787 |
| OTTHUMG00000040015 | OTTHUMT00000096515 | chr1:242337290-242338936 | + | 565  |
| OTTHUMG00000040628 | OTTHUMT00000097697 | chr1:244919972-244921746 | + | 520  |
| OTTHUMG00000040649 | OTTHUMT00000097749 | chr1:245754604-245756677 | - | 1636 |
| OTTHUMG00000041417 | OTTHUMT00000099211 | chr1:246714169-246715408 | - | 965  |
| OTTHUMG00000153448 | OTTHUMT00000331248 | chr1:246922115-246929034 | + | 576  |
| OTTHUMG00000017523 | OTTHUMT00000046373 | chr10:50001-50544        | - | 345  |
| OTTHUMG00000017531 | OTTHUMT00000046388 | chr10:779932-780898      | + | 422  |
| OTTHUMG00000017533 | OTTHUMT00000046393 | chr10:968966-978683      | + | 404  |
| OTTHUMG00000017547 | OTTHUMT00000046440 | chr10:2037667-2046542    | - | 2094 |
| OTTHUMG00000017547 | OTTHUMT00000046438 | chr10:2044459-2046542    | - | 774  |
| OTTHUMG00000017547 | OTTHUMT00000046439 | chr10:2044847-2045605    | - | 482  |
| OTTHUMG00000017544 | OTTHUMT00000046434 | chr10:2104039-2113291    | + | 430  |
| OTTHUMG00000017544 | OTTHUMT00000046433 | chr10:2104124-2104923    | + | 427  |
| OTTHUMG00000017545 | OTTHUMT00000046435 | chr10:2198526-2201654    | + | 2319 |
| OTTHUMG00000017546 | OTTHUMT00000046436 | chr10:2201334-2208626    | - | 295  |
| OTTHUMG00000017546 | OTTHUMT00000046437 | chr10:2201350-2208626    | - | 185  |
| OTTHUMG00000017548 | OTTHUMT00000046441 | chr10:2337277-2347269    | - | 739  |
| OTTHUMG00000017549 | OTTHUMT00000046442 | chr10:2478447-2479546    | - | 754  |
| OTTHUMG00000017549 | OTTHUMT00000046444 | chr10:2478447-2479546    | - | 762  |
| OTTHUMG00000017549 | OTTHUMT00000046443 | chr10:2478452-2479546    | - | 712  |
| OTTHUMG00000017550 | OTTHUMT00000046445 | chr10:2531913-2532762    | + | 330  |
| OTTHUMG00000017551 | OTTHUMT00000046447 | chr10:2533975-2599431    | + | 916  |
| OTTHUMG00000017551 | OTTHUMT00000046446 | chr10:2533995-2569817    | + | 318  |
| OTTHUMG00000017553 | OTTHUMT00000046449 | chr10:3016556-3017331    | + | 413  |
| OTTHUMG00000017554 | OTTHUMT00000046450 | chr10:3042723-3045303    | + | 605  |
| OTTHUMG00000017559 | OTTHUMT00000046476 | chr10:3237908-3238816    | + | 463  |
| OTTHUMG00000017561 | OTTHUMT00000046488 | chr10:3256008-3259599    | + | 594  |
| OTTHUMG00000017555 | OTTHUMT00000046451 | chr10:3272563-3289402    | - | 386  |
| OTTHUMG00000017562 | OTTHUMT00000046489 | chr10:3298195-3299207    | + | 461  |
| OTTHUMG00000017563 | OTTHUMT00000046490 | chr10:3519086-3535030    | - | 827  |
| OTTHUMG00000017564 | OTTHUMT00000046491 | chr10:3564286-3569223    | - | 428  |
| OTTHUMG00000017564 | OTTHUMT00000046492 | chr10:3567304-3569049    | - | 370  |
| OTTHUMG00000017566 | OTTHUMT00000046494 | chr10:3783259-3795418    | + | 752  |
| OTTHUMG00000017565 | OTTHUMT00000046493 | chr10:3800107-3800943    | + | 311  |
| OTTHUMG00000017568 | OTTHUMT00000046501 | chr10:3866142-3866920    | + | 534  |
| OTTHUMG00000017569 | OTTHUMT00000046503 | chr10:3964896-3968004    | + | 401  |

|                    |                    |                         |   |      |
|--------------------|--------------------|-------------------------|---|------|
| OTTHUMG00000017569 | OTTHUMT00000046502 | chr10:3966711-3968004   | + | 588  |
| OTTHUMG00000017570 | OTTHUMT00000046504 | chr10:4057132-4060586   | + | 631  |
| OTTHUMG00000017571 | OTTHUMT00000046505 | chr10:4083918-4121205   | + | 2283 |
| OTTHUMG00000017572 | OTTHUMT00000046507 | chr10:4267752-4275835   | - | 361  |
| OTTHUMG00000017572 | OTTHUMT00000046506 | chr10:4275142-4275981   | - | 444  |
| OTTHUMG00000017573 | OTTHUMT00000046508 | chr10:4416438-4442804   | + | 2388 |
| OTTHUMG00000017573 | OTTHUMT00000046509 | chr10:4438694-4441443   | + | 867  |
| OTTHUMG00000017574 | OTTHUMT00000046510 | chr10:4447497-4458371   | - | 687  |
| OTTHUMG00000017576 | OTTHUMT00000046512 | chr10:4683009-4710346   | - | 842  |
| OTTHUMG00000017576 | OTTHUMT00000046514 | chr10:4683295-4688992   | - | 415  |
| OTTHUMG00000017576 | OTTHUMT00000046513 | chr10:4683353-4710324   | - | 698  |
| OTTHUMG00000017575 | OTTHUMT00000046511 | chr10:4687619-4694611   | + | 1742 |
| OTTHUMG00000017587 | OTTHUMT00000046539 | chr10:5266321-5295165   | + | 475  |
| OTTHUMG00000017590 | OTTHUMT00000046542 | chr10:5297996-5303199   | - | 690  |
| OTTHUMG00000017601 | OTTHUMT00000046559 | chr10:5626954-5678087   | - | 700  |
| OTTHUMG00000017600 | OTTHUMT00000046558 | chr10:5690444-5692762   | - | 608  |
| OTTHUMG00000017599 | OTTHUMT00000046557 | chr10:5698831-5700130   | - | 654  |
| OTTHUMG00000017615 | OTTHUMT00000046626 | chr10:6203697-6208010   | - | 369  |
| OTTHUMG00000017614 | OTTHUMT00000046625 | chr10:6208011-6219526   | - | 405  |
| OTTHUMG00000017624 | OTTHUMT00000046667 | chr10:6700684-6707314   | + | 495  |
| OTTHUMG00000017625 | OTTHUMT00000046668 | chr10:6819350-6820994   | + | 915  |
| OTTHUMG00000017627 | OTTHUMT00000046670 | chr10:6861566-6924874   | + | 3065 |
| OTTHUMG00000017626 | OTTHUMT00000046669 | chr10:6973425-7002440   | - | 296  |
| OTTHUMG00000017628 | OTTHUMT00000046671 | chr10:7179120-7179643   | + | 434  |
| OTTHUMG00000017631 | OTTHUMT00000046676 | chr10:7527526-7553910   | - | 553  |
| OTTHUMG00000017632 | OTTHUMT00000046677 | chr10:7615175-7618533   | + | 711  |
| OTTHUMG00000017645 | OTTHUMT00000046728 | chr10:8341300-8342773   | - | 363  |
| OTTHUMG00000017645 | OTTHUMT00000046727 | chr10:8341300-8350274   | - | 911  |
| OTTHUMG00000017646 | OTTHUMT00000046729 | chr10:8380866-8383636   | + | 899  |
| OTTHUMG00000017648 | OTTHUMT00000046731 | chr10:8482829-8543832   | + | 426  |
| OTTHUMG00000017650 | OTTHUMT00000046733 | chr10:8979958-8996565   | + | 362  |
| OTTHUMG00000017651 | OTTHUMT00000046734 | chr10:9052094-9055437   | + | 675  |
| OTTHUMG00000017652 | OTTHUMT00000046735 | chr10:9357802-9369026   | + | 492  |
| OTTHUMG00000017654 | OTTHUMT00000046737 | chr10:9840752-9841206   | - | 342  |
| OTTHUMG00000017655 | OTTHUMT00000046738 | chr10:10140691-10145471 | + | 571  |
| OTTHUMG00000017657 | OTTHUMT00000046740 | chr10:10447149-10448456 | - | 333  |
| OTTHUMG00000017658 | OTTHUMT00000046741 | chr10:10517918-10544254 | - | 1246 |
| OTTHUMG00000017660 | OTTHUMT00000046745 | chr10:10866408-10876883 | - | 869  |
| OTTHUMG00000017660 | OTTHUMT00000046743 | chr10:10868609-10876936 | - | 396  |
| OTTHUMG00000017660 | OTTHUMT00000046744 | chr10:10868613-10876949 | - | 252  |
| OTTHUMG00000017661 | OTTHUMT00000046748 | chr10:11016909-11018632 | - | 512  |
| OTTHUMG00000017661 | OTTHUMT00000046746 | chr10:11016909-11034064 | - | 1038 |
| OTTHUMG00000017661 | OTTHUMT00000046747 | chr10:11028875-11034121 | - | 737  |
| OTTHUMG00000017662 | OTTHUMT00000046749 | chr10:11042120-11052785 | + | 534  |
| OTTHUMG00000017671 | OTTHUMT00000046763 | chr10:11535951-11537392 | + | 501  |

|                    |                    |                         |   |      |
|--------------------|--------------------|-------------------------|---|------|
| OTTHUMG00000017697 | OTTHUMT00000046861 | chr10:13497208-13505139 | + | 452  |
| OTTHUMG00000017698 | OTTHUMT00000046862 | chr10:13610522-13612268 | + | 378  |
| OTTHUMG00000017736 | OTTHUMT00000046999 | chr10:16360706-16371053 | + | 432  |
| OTTHUMG00000017736 | OTTHUMT00000046998 | chr10:16360706-16377863 | + | 454  |
| OTTHUMG00000017743 | OTTHUMT00000047014 | chr10:17296244-17308903 | - | 1347 |
| OTTHUMG00000017769 | OTTHUMT00000047086 | chr10:19075368-19076788 | + | 546  |
| OTTHUMG00000017777 | OTTHUMT00000047094 | chr10:20039263-20057485 | - | 1399 |
| OTTHUMG00000017777 | OTTHUMT00000047095 | chr10:20050632-20057485 | - | 819  |
| OTTHUMG00000017777 | OTTHUMT00000047096 | chr10:20050913-20057485 | - | 704  |
| OTTHUMG00000017792 | OTTHUMT00000047127 | chr10:21669168-21701885 | - | 434  |
| OTTHUMG00000017831 | OTTHUMT00000047247 | chr10:25441993-25446292 | + | 786  |
| OTTHUMG00000017833 | OTTHUMT00000047252 | chr10:25980710-26011580 | + | 437  |
| OTTHUMG00000017840 | OTTHUMT00000047267 | chr10:26906611-26908030 | - | 430  |
| OTTHUMG00000017840 | OTTHUMT00000047266 | chr10:26906611-26908242 | - | 419  |
| OTTHUMG00000017839 | OTTHUMT00000047265 | chr10:26918800-26923259 | + | 1081 |
| OTTHUMG00000017847 | OTTHUMT00000047282 | chr10:26972163-26973951 | + | 470  |
| OTTHUMG00000017842 | OTTHUMT00000047272 | chr10:26976921-26982381 | + | 1215 |
| OTTHUMG00000017842 | OTTHUMT00000047273 | chr10:26977035-26982389 | + | 876  |
| OTTHUMG00000017842 | OTTHUMT00000047274 | chr10:26978267-26982046 | + | 410  |
| OTTHUMG00000017843 | OTTHUMT00000047275 | chr10:26993141-27005094 | - | 316  |
| OTTHUMG00000017849 | OTTHUMT00000047294 | chr10:27260141-27263858 | - | 866  |
| OTTHUMG00000017849 | OTTHUMT00000047292 | chr10:27260141-27266794 | - | 1783 |
| OTTHUMG00000017849 | OTTHUMT00000047293 | chr10:27260141-27270936 | - | 3615 |
| OTTHUMG00000017850 | OTTHUMT00000047295 | chr10:27272258-27273353 | - | 643  |
| OTTHUMG00000017875 | OTTHUMT00000047375 | chr10:29072680-29073598 | + | 515  |
| OTTHUMG00000017876 | OTTHUMT00000047376 | chr10:29118123-29124908 | - | 3956 |
| OTTHUMG00000017876 | OTTHUMT00000047377 | chr10:29121504-29125048 | - | 594  |
| OTTHUMG00000017877 | OTTHUMT00000047378 | chr10:29135882-29137154 | + | 404  |
| OTTHUMG00000017886 | OTTHUMT00000047412 | chr10:30609021-30609845 | - | 512  |
| OTTHUMG00000017896 | OTTHUMT00000047431 | chr10:30882789-30883418 | - | 539  |
| OTTHUMG00000017897 | OTTHUMT00000047432 | chr10:30905634-30909117 | + | 376  |
| OTTHUMG00000017899 | OTTHUMT00000047435 | chr10:30984424-30986470 | + | 483  |
| OTTHUMG00000017902 | OTTHUMT00000047438 | chr10:31052186-31052675 | + | 406  |
| OTTHUMG00000017909 | OTTHUMT00000047455 | chr10:31933534-31935152 | + | 419  |
| OTTHUMG00000017910 | OTTHUMT00000047456 | chr10:32022018-32036322 | - | 345  |
| OTTHUMG00000017937 | OTTHUMT00000047515 | chr10:33425191-33445606 | - | 550  |
| OTTHUMG00000017939 | OTTHUMT00000047517 | chr10:33907865-33928974 | - | 858  |
| OTTHUMG00000017940 | OTTHUMT00000047518 | chr10:34013689-34015998 | + | 450  |
| OTTHUMG00000017942 | OTTHUMT00000047520 | chr10:34238172-34246738 | + | 626  |
| OTTHUMG00000017954 | OTTHUMT00000047566 | chr10:35548828-35559532 | - | 378  |
| OTTHUMG00000017959 | OTTHUMT00000047578 | chr10:36225808-36227897 | - | 866  |
| OTTHUMG00000017960 | OTTHUMT00000047579 | chr10:36418020-36418323 | - | 185  |
| OTTHUMG00000017963 | OTTHUMT00000047583 | chr10:36767550-36768731 | + | 396  |
| OTTHUMG00000017963 | OTTHUMT00000047582 | chr10:36767550-36771326 | + | 318  |
| OTTHUMG00000017969 | OTTHUMT00000047593 | chr10:37569821-37570983 | + | 332  |

|                    |                    |                         |   |      |
|--------------------|--------------------|-------------------------|---|------|
| OTTHUMG00000017976 | OTTHUMT00000047602 | chr10:38104305-38113065 | - | 709  |
| OTTHUMG00000017984 | OTTHUMT00000047618 | chr10:38493582-38506964 | + | 425  |
| OTTHUMG00000018001 | OTTHUMT00000047660 | chr10:38973919-39022206 | - | 1515 |
| OTTHUMG00000018001 | OTTHUMT00000047661 | chr10:38974088-38983415 | - | 386  |
| OTTHUMG00000018001 | OTTHUMT00000047659 | chr10:38977632-39022206 | - | 1329 |
| OTTHUMG00000017999 | OTTHUMT00000047656 | chr10:39046332-39052613 | + | 490  |
| OTTHUMG00000017999 | OTTHUMT00000047657 | chr10:39050990-39052513 | + | 500  |
| OTTHUMG00000018010 | OTTHUMT00000047672 | chr10:42290997-42310790 | + | 2259 |
| OTTHUMG00000018010 | OTTHUMT00000047673 | chr10:42291082-42310790 | + | 2258 |
| OTTHUMG00000018017 | OTTHUMT00000047687 | chr10:42489651-42507177 | - | 515  |
| OTTHUMG00000018021 | OTTHUMT00000047691 | chr10:42686975-42689514 | + | 1712 |
| OTTHUMG00000018022 | OTTHUMT00000047692 | chr10:42794471-42796961 | - | 497  |
| OTTHUMG00000018026 | OTTHUMT00000047697 | chr10:43139119-43143386 | + | 388  |
| OTTHUMG00000018028 | OTTHUMT00000047701 | chr10:43236053-43237260 | + | 300  |
| OTTHUMG00000018041 | OTTHUMT00000047721 | chr10:43481122-43482459 | + | 460  |
| OTTHUMG00000018047 | OTTHUMT00000047730 | chr10:43593016-43594080 | - | 332  |
| OTTHUMG00000018047 | OTTHUMT00000047729 | chr10:43593016-43594279 | - | 406  |
| OTTHUMG00000018049 | OTTHUMT00000047732 | chr10:43674865-43710887 | + | 1969 |
| OTTHUMG00000018052 | OTTHUMT00000047735 | chr10:43716819-43727780 | - | 491  |
| OTTHUMG00000018050 | OTTHUMT00000047733 | chr10:43727898-43729690 | + | 511  |
| OTTHUMG00000018051 | OTTHUMT00000047734 | chr10:43729353-43729960 | - | 463  |
| OTTHUMG00000018053 | OTTHUMT00000047736 | chr10:43754457-43759920 | + | 2121 |
| OTTHUMG00000018055 | OTTHUMT00000047740 | chr10:44075056-44077267 | - | 839  |
| OTTHUMG00000018056 | OTTHUMT00000047741 | chr10:44107712-44109163 | - | 913  |
| OTTHUMG00000018058 | OTTHUMT00000047743 | chr10:44406662-44417558 | - | 730  |
| OTTHUMG00000018092 | OTTHUMT00000047811 | chr10:45630882-45632778 | - | 320  |
| OTTHUMG00000018097 | OTTHUMT00000047821 | chr10:46218376-46229027 | - | 706  |
| OTTHUMG00000018106 | OTTHUMT00000047835 | chr10:46371559-46373614 | + | 551  |
| OTTHUMG00000018109 | OTTHUMT00000047838 | chr10:46516460-46519722 | - | 2441 |
| OTTHUMG00000018120 | OTTHUMT00000047852 | chr10:46699198-46700341 | - | 489  |
| OTTHUMG00000018120 | OTTHUMT00000047851 | chr10:46699198-46709839 | - | 706  |
| OTTHUMG00000018125 | OTTHUMT00000047857 | chr10:47026171-47036810 | + | 157  |
| OTTHUMG00000018126 | OTTHUMT00000047858 | chr10:47040519-47043861 | - | 165  |
| OTTHUMG00000018129 | OTTHUMT00000047861 | chr10:47128240-47171449 | + | 2114 |
| OTTHUMG00000018129 | OTTHUMT00000047862 | chr10:47128255-47135134 | + | 631  |
| OTTHUMG00000018129 | OTTHUMT00000047863 | chr10:47138563-47151741 | + | 498  |
| OTTHUMG00000018129 | OTTHUMT00000047864 | chr10:47138648-47151741 | + | 422  |
| OTTHUMG00000018145 | OTTHUMT00000047886 | chr10:47944794-47952203 | - | 595  |
| OTTHUMG00000018152 | OTTHUMT00000047900 | chr10:48608127-48609274 | - | 489  |
| OTTHUMG00000018152 | OTTHUMT00000047899 | chr10:48608127-48618772 | - | 706  |
| OTTHUMG00000018174 | OTTHUMT00000047941 | chr10:49542250-49550475 | - | 333  |
| OTTHUMG00000018252 | OTTHUMT00000048112 | chr10:53880643-53885038 | - | 969  |
| OTTHUMG00000018252 | OTTHUMT00000048111 | chr10:53881080-53900299 | - | 566  |
| OTTHUMG00000018253 | OTTHUMT00000048114 | chr10:53986468-53990871 | - | 538  |
| OTTHUMG00000018253 | OTTHUMT00000048113 | chr10:53986749-54185175 | - | 366  |

|                    |                    |                         |   |      |
|--------------------|--------------------|-------------------------|---|------|
| OTTHUMG00000018255 | OTTHUMT00000048117 | chr10:54403254-54405581 | - | 412  |
| OTTHUMG00000018257 | OTTHUMT00000048119 | chr10:54720838-54740831 | - | 595  |
| OTTHUMG00000018267 | OTTHUMT00000048141 | chr10:59734319-59735387 | + | 326  |
| OTTHUMG00000018273 | OTTHUMT00000048153 | chr10:60429392-60431309 | + | 475  |
| OTTHUMG00000018280 | OTTHUMT00000048170 | chr10:61018914-61041012 | + | 533  |
| OTTHUMG00000018296 | OTTHUMT00000048231 | chr10:63211520-63251010 | - | 473  |
| OTTHUMG00000018310 | OTTHUMT00000048248 | chr10:64553704-64555303 | - | 502  |
| OTTHUMG00000018322 | OTTHUMT00000048267 | chr10:65466111-65467046 | - | 620  |
| OTTHUMG00000018325 | OTTHUMT00000048270 | chr10:66332891-66354282 | - | 579  |
| OTTHUMG00000018329 | OTTHUMT00000048274 | chr10:66743549-66744734 | + | 304  |
| OTTHUMG00000018330 | OTTHUMT00000048275 | chr10:67015452-67111226 | + | 741  |
| OTTHUMG00000018345 | OTTHUMT00000048310 | chr10:69663014-69672142 | - | 462  |
| OTTHUMG00000018345 | OTTHUMT00000048311 | chr10:69663016-69665196 | - | 415  |
| OTTHUMG00000018350 | OTTHUMT00000048332 | chr10:69907761-69910527 | - | 1778 |
| OTTHUMG00000018384 | OTTHUMT00000048457 | chr10:71005569-71006916 | + | 501  |
| OTTHUMG00000018393 | OTTHUMT00000048466 | chr10:71096990-71121535 | + | 1892 |
| OTTHUMG00000018393 | OTTHUMT00000048467 | chr10:71096998-71148005 | + | 3035 |
| OTTHUMG00000018395 | OTTHUMT00000048479 | chr10:71424388-71437598 | - | 521  |
| OTTHUMG00000018418 | OTTHUMT00000048530 | chr10:72359688-72361820 | + | 1961 |
| OTTHUMG00000018428 | OTTHUMT00000048552 | chr10:73308120-73308871 | + | 523  |
| OTTHUMG00000018522 | OTTHUMT00000048822 | chr10:76709490-76713135 | - | 345  |
| OTTHUMG00000018522 | OTTHUMT00000048821 | chr10:76709495-76713110 | - | 376  |
| OTTHUMG00000018524 | OTTHUMT00000048824 | chr10:76726154-76791442 | + | 1857 |
| OTTHUMG00000018553 | OTTHUMT00000048932 | chr10:79723605-79730766 | + | 518  |
| OTTHUMG00000018554 | OTTHUMT00000048933 | chr10:79782360-79785863 | + | 379  |
| OTTHUMG00000018557 | OTTHUMT00000048938 | chr10:79958514-80104730 | + | 341  |
| OTTHUMG00000018556 | OTTHUMT00000048937 | chr10:80125825-80126785 | - | 577  |
| OTTHUMG00000018570 | OTTHUMT00000048970 | chr10:81058519-81061950 | - | 603  |
| OTTHUMG00000018570 | OTTHUMT00000048971 | chr10:81060517-81061948 | - | 383  |
| OTTHUMG00000018573 | OTTHUMT00000048976 | chr10:81194492-81216205 | - | 2219 |
| OTTHUMG00000018580 | OTTHUMT00000048993 | chr10:81253726-81255935 | - | 331  |
| OTTHUMG00000018575 | OTTHUMT00000048979 | chr10:81378441-81381879 | - | 603  |
| OTTHUMG00000018575 | OTTHUMT00000048980 | chr10:81380446-81381877 | - | 383  |
| OTTHUMG00000018587 | OTTHUMT00000049008 | chr10:81576439-81588217 | + | 883  |
| OTTHUMG00000018595 | OTTHUMT00000049018 | chr10:81654634-81681537 | + | 812  |
| OTTHUMG00000018595 | OTTHUMT00000049017 | chr10:81669914-81672855 | + | 1421 |
| OTTHUMG00000018612 | OTTHUMT00000049069 | chr10:82083507-82084162 | + | 337  |
| OTTHUMG00000018616 | OTTHUMT00000049090 | chr10:82279333-82285678 | - | 596  |
| OTTHUMG00000018618 | OTTHUMT00000049095 | chr10:82399533-82403468 | + | 367  |
| OTTHUMG00000018629 | OTTHUMT00000049106 | chr10:85422142-85425175 | - | 348  |
| OTTHUMG00000018630 | OTTHUMT00000049107 | chr10:85661390-85662658 | - | 307  |
| OTTHUMG00000018638 | OTTHUMT00000049127 | chr10:86029716-86044395 | + | 2679 |
| OTTHUMG00000018638 | OTTHUMT00000049128 | chr10:86029727-86038731 | + | 671  |
| OTTHUMG00000018644 | OTTHUMT00000049141 | chr10:86943157-86947694 | - | 2026 |
| OTTHUMG00000018645 | OTTHUMT00000049142 | chr10:87181679-87182251 | - | 401  |

|                    |                    |                           |   |      |
|--------------------|--------------------|---------------------------|---|------|
| OTTHUMG00000018646 | OTTHUMT00000049143 | chr10:87182599-87194665   | + | 498  |
| OTTHUMG00000018647 | OTTHUMT00000049144 | chr10:87199329-87241733   | + | 1481 |
| OTTHUMG00000018673 | OTTHUMT00000049215 | chr10:89092661-89105167   | + | 887  |
| OTTHUMG00000018680 | OTTHUMT00000049225 | chr10:89341344-89355761   | - | 166  |
| OTTHUMG00000018723 | OTTHUMT00000049326 | chr10:91444032-91447665   | - | 665  |
| OTTHUMG00000018726 | OTTHUMT00000049333 | chr10:91579247-91590598   | + | 4268 |
| OTTHUMG00000018726 | OTTHUMT00000049334 | chr10:91579293-91590598   | + | 3888 |
| OTTHUMG00000018728 | OTTHUMT00000049336 | chr10:91665226-91707110   | - | 1856 |
| OTTHUMG00000018731 | OTTHUMT00000049342 | chr10:92152258-92290542   | - | 974  |
| OTTHUMG00000018729 | OTTHUMT00000049337 | chr10:92203907-92251177   | + | 2365 |
| OTTHUMG00000018729 | OTTHUMT00000049339 | chr10:92204417-92211238   | + | 872  |
| OTTHUMG00000018729 | OTTHUMT00000049340 | chr10:92204435-92252705   | + | 458  |
| OTTHUMG00000018729 | OTTHUMT00000049338 | chr10:92204435-92280853   | + | 780  |
| OTTHUMG00000018730 | OTTHUMT00000049341 | chr10:92212454-92217689   | + | 828  |
| OTTHUMG00000018737 | OTTHUMT00000049360 | chr10:92710813-92747485   | - | 361  |
| OTTHUMG00000018736 | OTTHUMT00000049359 | chr10:92744357-92756127   | + | 378  |
| OTTHUMG00000018806 | OTTHUMT00000049504 | chr10:96891672-96918172   | - | 416  |
| OTTHUMG00000018885 | OTTHUMT00000049800 | chr10:101276828-101278008 | + | 390  |
| OTTHUMG00000018909 | OTTHUMT00000049862 | chr10:102123362-102133115 | + | 2549 |
| OTTHUMG00000018926 | OTTHUMT00000049927 | chr10:102931437-102943894 | + | 845  |
| OTTHUMG00000018928 | OTTHUMT00000049932 | chr10:102981999-102988239 | + | 551  |
| OTTHUMG00000018928 | OTTHUMT00000049931 | chr10:102985815-102988595 | + | 2551 |
| OTTHUMG00000018928 | OTTHUMT00000049930 | chr10:102987685-103019895 | + | 415  |
| OTTHUMG00000018928 | OTTHUMT00000049929 | chr10:102987750-102988606 | + | 418  |
| OTTHUMG00000018930 | OTTHUMT00000049934 | chr10:103002568-103013297 | - | 2219 |
| OTTHUMG00000018929 | OTTHUMT00000049933 | chr10:103060765-103061252 | + | 380  |
| OTTHUMG00000018931 | OTTHUMT00000049935 | chr10:103072390-103072753 | - | 280  |
| OTTHUMG00000018941 | OTTHUMT00000050002 | chr10:103454399-103458148 | - | 289  |
| OTTHUMG00000019008 | OTTHUMT00000050218 | chr10:106224687-106230022 | - | 1010 |
| OTTHUMG00000019009 | OTTHUMT00000050219 | chr10:106365850-106366721 | + | 367  |
| OTTHUMG00000019012 | OTTHUMT00000050223 | chr10:107239344-107252103 | - | 447  |
| OTTHUMG00000019015 | OTTHUMT00000050226 | chr10:107558523-107568945 | - | 453  |
| OTTHUMG00000019016 | OTTHUMT00000050227 | chr10:107890012-107938470 | + | 458  |
| OTTHUMG00000019016 | OTTHUMT00000050228 | chr10:107890039-107907893 | + | 549  |
| OTTHUMG00000019016 | OTTHUMT00000050230 | chr10:107913096-107938368 | + | 661  |
| OTTHUMG00000019016 | OTTHUMT00000050229 | chr10:107934133-107949128 | + | 681  |
| OTTHUMG00000019019 | OTTHUMT00000050239 | chr10:109126298-109150984 | + | 524  |
| OTTHUMG00000019020 | OTTHUMT00000050240 | chr10:109621324-109819042 | - | 717  |
| OTTHUMG00000019022 | OTTHUMT00000050242 | chr10:110297723-110311563 | - | 572  |
| OTTHUMG00000019024 | OTTHUMT00000050244 | chr10:110460266-110589111 | + | 477  |
| OTTHUMG00000019052 | OTTHUMT00000050374 | chr10:113099687-113101851 | - | 425  |
| OTTHUMG00000019067 | OTTHUMT00000050408 | chr10:114638482-114655860 | + | 314  |
| OTTHUMG00000019095 | OTTHUMT00000050506 | chr10:116744406-116746342 | + | 341  |
| OTTHUMG00000019116 | OTTHUMT00000050558 | chr10:118908157-118918556 | - | 2379 |
| OTTHUMG00000019124 | OTTHUMT00000050570 | chr10:119311585-119321958 | - | 472  |



|                     |                     |                           |   |      |
|---------------------|---------------------|---------------------------|---|------|
| OTTHUMG00000019126  | OTTHUMT00000050576  | chr10:119484814-119485908 | + | 242  |
| OTTHUMG00000019130  | OTTHUMT00000050591  | chr10:119991066-119991576 | + | 409  |
| OTTHUMG00000019130  | OTTHUMT00000050588  | chr10:119991145-119997375 | + | 489  |
| OTTHUMG00000019130  | OTTHUMT00000050589  | chr10:119991147-119997375 | + | 400  |
| OTTHUMG00000019130  | OTTHUMT00000050590  | chr10:119991154-120017212 | + | 552  |
| OTTHUMG00000019132  | OTTHUMT00000050603  | chr10:120106610-120108705 | + | 577  |
| OTTHUMG00000019132  | OTTHUMT00000050604  | chr10:120107047-120108705 | + | 315  |
| OTTHUMG00000019132  | OTTHUMT00000050606  | chr10:120107061-120114605 | + | 485  |
| OTTHUMG00000019132  | OTTHUMT00000050605  | chr10:120107257-120114605 | + | 483  |
| OTTHUMG00000019140  | OTTHUMT00000050620  | chr10:120753038-120753386 | - | 227  |
| OTTHUMG00000019164  | OTTHUMT00000050697  | chr10:121930732-121958497 | + | 475  |
| OTTHUMG00000019169  | OTTHUMT00000050704  | chr10:122511314-122526386 | - | 2012 |
| OTTHUMG00000019169  | OTTHUMT00000050705  | chr10:122512903-122541427 | - | 903  |
| OTTHUMG00000019170  | OTTHUMT00000050706  | chr10:122675049-122730203 | - | 941  |
| OTTHUMG00000019173  | OTTHUMT00000050713  | chr10:122928204-122935470 | + | 2862 |
| OTTHUMG00000019174  | OTTHUMT00000050714  | chr10:123364929-123365343 | - | 308  |
| OTTHUMG00000019202  | OTTHUMT00000050847  | chr10:125105956-125267214 | + | 826  |
| OTTHUMG00000019201  | OTTHUMT00000050846  | chr10:125175219-125177146 | - | 414  |
| OTTHUMG00000019202  | OTTHUMT00000050848  | chr10:125198859-125238842 | + | 572  |
| OTTHUMG00000019203  | OTTHUMT00000050849  | chr10:125323733-125333273 | + | 435  |
| OTTHUMG00000019207  | OTTHUMT00000050855  | chr10:125663080-125681103 | - | 386  |
| OTTHUMG00000019220  | OTTHUMT00000050895  | chr10:126607442-126609952 | - | 428  |
| OTTHUMG00000019244  | OTTHUMT00000050968  | chr10:128092428-128100438 | - | 1164 |
| OTTHUMG00000019256  | OTTHUMT00000051004  | chr10:130004536-130008468 | - | 344  |
| OTTHUMG00000019259  | OTTHUMT00000051007  | chr10:130585756-130586223 | - | 198  |
| OTTHUMG00000019258  | OTTHUMT00000051006  | chr10:130601133-130604525 | + | 445  |
| OTTHUMG00000019257  | OTTHUMT00000051005  | chr10:130647026-130648316 | - | 372  |
| OTTHUMG00000019260  | OTTHUMT00000051008  | chr10:130966505-130979976 | + | 473  |
| OTTHUMG00000019263  | OTTHUMT00000051013  | chr10:131457098-131457689 | + | 493  |
| OTTHUMG00000019264  | OTTHUMT00000051014  | chr10:131471107-131474801 | + | 2702 |
| OTTHUMG00000019271  | OTTHUMT00000051028  | chr10:131874435-131875120 | + | 550  |
| OTTHUMG00000019272  | OTTHUMT00000051029  | chr10:131891128-131891382 | - | 222  |
| OTTHUMG00000019273  | OTTHUMT00000051030  | chr10:132127321-132171408 | - | 295  |
| OTTHUMG00000019287  | OTTHUMT00000051076  | chr10:134082577-134084447 | + | 295  |
| OTTHUMG00000019288  | OTTHUMT00000051077  | chr10:134097227-134104978 | - | 1011 |
| OTTHUMG00000019290  | OTTHUMT00000051080  | chr10:134175120-134181685 | - | 632  |
| OTTHUMG00000019291  | OTTHUMT00000051081  | chr10:134184321-134185943 | - | 1622 |
| OTTHUMG00000019299  | OTTHUMT00000051102  | chr10:134607461-134628783 | - | 2617 |
| OTTHUMG00000019299  | OTTHUMT00000051101  | chr10:134607461-134628918 | - | 2617 |
| OTTHUMG00000019300  | OTTHUMT00000051103  | chr10:134624834-134625731 | - | 602  |
| OTTHUMG00000019308  | OTTHUMT00000051117  | chr10:134910383-134911380 | + | 256  |
| OTTHUMG00000019326  | OTTHUMT00000051177  | chr10:135130468-135131906 | + | 944  |
| OTTHUMG00000045388  | OTTHUMT000000105392 | chr11:1754736-1756194     | - | 336  |
| OTTHUMG000000150032 | OTTHUMT000000315844 | chr11:1880453-1885721     | + | 312  |
| OTTHUMG00000012473  | OTTHUMT00000034754  | chr11:1968902-1971275     | + | 719  |

|                     |                     |                           |   |      |
|---------------------|---------------------|---------------------------|---|------|
| OTTHUMG00000011701  | OTTHUMT00000032331  | chr11:3167352-3167735     | + | 291  |
| OTTHUMG00000066612  | OTTHUMT000000142819 | chr11:5083868-5085336     | - | 867  |
| OTTHUMG00000066679  | OTTHUMT000000142980 | chr11:5182847-5185114     | + | 520  |
| OTTHUMG000000141269 | OTTHUMT000000280452 | chr11:60139785-60211198   | + | 766  |
| OTTHUMG000000141269 | OTTHUMT000000280451 | chr11:60139800-60211198   | + | 845  |
| OTTHUMG00000045125  | OTTHUMT000000104844 | chr11:63849098-63853552   | - | 669  |
| OTTHUMG000000150041 | OTTHUMT000000315945 | chr11:63918390-63919879   | - | 983  |
| OTTHUMG000000150231 | OTTHUMT000000316962 | chr11:63934124-63944263   | - | 416  |
| OTTHUMG00000066368  | OTTHUMT000000141968 | chr11:63952209-63956718   | + | 311  |
| OTTHUMG00000066367  | OTTHUMT000000141967 | chr11:64024901-64029434   | + | 519  |
| OTTHUMG00000045137  | OTTHUMT000000104866 | chr11:115872826-115876557 | - | 919  |
| OTTHUMG00000045138  | OTTHUMT000000104867 | chr11:116015349-116034179 | + | 580  |
| OTTHUMG00000045138  | OTTHUMT000000104868 | chr11:116015407-116031116 | + | 366  |
| OTTHUMG00000046113  | OTTHUMT000000106282 | chr11:116189130-116189929 | - | 331  |
| OTTHUMG00000066362  | OTTHUMT000000141934 | chr11:130562127-130564858 | + | 633  |
| OTTHUMG000000150049 | OTTHUMT000000316014 | chr11:130580104-130590268 | + | 560  |
| OTTHUMG000000150045 | OTTHUMT000000316004 | chr11:130609643-130626921 | + | 567  |
| OTTHUMG00000066363  | OTTHUMT000000141935 | chr11:130628527-130675876 | + | 582  |
| OTTHUMG000000140394 | OTTHUMT000000277174 | chr12:9980445-9987361     | - | 974  |
| OTTHUMG00000059745  | OTTHUMT000000132852 | chr12:38836308-38847681   | + | 468  |
| OTTHUMG00000059745  | OTTHUMT000000133438 | chr12:38846321-38847776   | + | 557  |
| OTTHUMG00000016451  | OTTHUMT00000043974  | chr13:18012637-18022837   | + | 839  |
| OTTHUMG00000016454  | OTTHUMT00000043977  | chr13:18144967-18148303   | + | 456  |
| OTTHUMG00000016461  | OTTHUMT00000043984  | chr13:18190907-18191869   | - | 428  |
| OTTHUMG00000016469  | OTTHUMT00000043992  | chr13:18377579-18379950   | + | 556  |
| OTTHUMG00000016470  | OTTHUMT00000043993  | chr13:18394029-18395905   | + | 744  |
| OTTHUMG00000016478  | OTTHUMT00000044003  | chr13:18734937-18735285   | - | 348  |
| OTTHUMG00000016478  | OTTHUMT00000044002  | chr13:18734937-18736013   | - | 397  |
| OTTHUMG00000016497  | OTTHUMT00000044027  | chr13:19059258-19060490   | + | 420  |
| OTTHUMG00000016499  | OTTHUMT00000044033  | chr13:19146764-19148024   | - | 374  |
| OTTHUMG00000016502  | OTTHUMT00000044038  | chr13:19146896-19150078   | - | 442  |
| OTTHUMG00000016500  | OTTHUMT00000044034  | chr13:19150830-19151837   | + | 261  |
| OTTHUMG00000016506  | OTTHUMT00000044048  | chr13:19574840-19575369   | + | 429  |
| OTTHUMG00000016533  | OTTHUMT00000044106  | chr13:20706707-20707343   | + | 403  |
| OTTHUMG00000046188  | OTTHUMT000000106493 | chr13:20759545-20766997   | + | 675  |
| OTTHUMG00000016547  | OTTHUMT00000044133  | chr13:21344909-21348817   | - | 1620 |
| OTTHUMG00000016555  | OTTHUMT00000044141  | chr13:22324135-22324991   | + | 531  |
| OTTHUMG00000016559  | OTTHUMT00000044145  | chr13:22641974-22642736   | + | 262  |
| OTTHUMG00000016566  | OTTHUMT00000044154  | chr13:22942186-22958449   | + | 395  |
| OTTHUMG00000016567  | OTTHUMT00000044155  | chr13:22970935-22975013   | + | 550  |
| OTTHUMG00000016572  | OTTHUMT00000044167  | chr13:23411696-23418921   | - | 2792 |
| OTTHUMG00000016572  | OTTHUMT000000276085 | chr13:23413108-23418363   | - | 636  |
| OTTHUMG00000016605  | OTTHUMT00000044224  | chr13:24653579-24661898   | + | 768  |
| OTTHUMG00000016610  | OTTHUMT00000044235  | chr13:25524414-25525523   | - | 433  |
| OTTHUMG00000016629  | OTTHUMT00000044269  | chr13:26708419-26708948   | - | 418  |

|                    |                    |                         |   |      |
|--------------------|--------------------|-------------------------|---|------|
| OTTHUMG00000016631 | OTTHUMT00000044280 | chr13:26845485-26846503 | + | 578  |
| OTTHUMG00000147351 | OTTHUMT00000303976 | chr13:29344750-29360542 | + | 911  |
| OTTHUMG00000016662 | OTTHUMT00000044343 | chr13:29390784-29398788 | - | 573  |
| OTTHUMG00000055980 | OTTHUMT00000125970 | chr13:29494158-29495937 | - | 1779 |
| OTTHUMG00000016663 | OTTHUMT00000125960 | chr13:29575315-29581005 | - | 2616 |
| OTTHUMG00000016663 | OTTHUMT00000044344 | chr13:29579736-29581012 | - | 478  |
| OTTHUMG00000055982 | OTTHUMT00000125972 | chr13:29624023-29631758 | - | 6850 |
| OTTHUMG00000016664 | OTTHUMT00000044345 | chr13:29626203-29626723 | + | 372  |
| OTTHUMG00000055979 | OTTHUMT00000125969 | chr13:29668580-29669018 | - | 438  |
| OTTHUMG00000016667 | OTTHUMT00000044348 | chr13:29788497-29792040 | - | 428  |
| OTTHUMG00000016668 | OTTHUMT00000125966 | chr13:29812407-29846036 | - | 1584 |
| OTTHUMG00000016668 | OTTHUMT00000044350 | chr13:29813496-29839804 | - | 504  |
| OTTHUMG00000016668 | OTTHUMT00000044349 | chr13:29814597-29837898 | - | 1040 |
| OTTHUMG00000016668 | OTTHUMT00000044352 | chr13:29829402-29836333 | - | 588  |
| OTTHUMG00000016668 | OTTHUMT00000044351 | chr13:29829879-29849282 | - | 1050 |
| OTTHUMG00000016668 | OTTHUMT00000125967 | chr13:29829882-29844511 | - | 420  |
| OTTHUMG00000016668 | OTTHUMT00000044353 | chr13:29835313-29845169 | - | 465  |
| OTTHUMG00000016668 | OTTHUMT00000303977 | chr13:29842609-29846051 | - | 273  |
| OTTHUMG00000016668 | OTTHUMT00000044354 | chr13:29846140-29849101 | - | 536  |
| OTTHUMG00000055981 | OTTHUMT00000125971 | chr13:29891656-29894374 | - | 446  |
| OTTHUMG00000016676 | OTTHUMT00000044371 | chr13:30275343-30282782 | + | 904  |
| OTTHUMG00000016678 | OTTHUMT00000044374 | chr13:30354688-30355532 | + | 409  |
| OTTHUMG00000016680 | OTTHUMT00000044377 | chr13:30402814-30403619 | - | 433  |
| OTTHUMG00000016684 | OTTHUMT00000044383 | chr13:30467299-30468275 | - | 397  |
| OTTHUMG00000153574 | OTTHUMT00000331670 | chr13:31457822-31463134 | + | 147  |
| OTTHUMG00000016695 | OTTHUMT00000044404 | chr13:31770291-31770849 | + | 435  |
| OTTHUMG00000016703 | OTTHUMT00000044431 | chr13:32349569-32383788 | - | 899  |
| OTTHUMG00000016726 | OTTHUMT00000044468 | chr13:35169661-35171138 | + | 374  |
| OTTHUMG00000016726 | OTTHUMT00000044469 | chr13:35169864-35171393 | + | 641  |
| OTTHUMG00000016750 | OTTHUMT00000044565 | chr13:36953604-36956906 | - | 507  |
| OTTHUMG00000016755 | OTTHUMT00000044593 | chr13:37522954-37615369 | - | 515  |
| OTTHUMG00000016755 | OTTHUMT00000044595 | chr13:37525835-37533585 | - | 523  |
| OTTHUMG00000016755 | OTTHUMT00000044594 | chr13:37526057-37533590 | - | 495  |
| OTTHUMG00000016756 | OTTHUMT00000044596 | chr13:38005480-38017436 | - | 789  |
| OTTHUMG00000016758 | OTTHUMT00000044598 | chr13:38048777-38051131 | + | 432  |
| OTTHUMG00000016770 | OTTHUMT00000044627 | chr13:39653946-39661165 | + | 830  |
| OTTHUMG00000016771 | OTTHUMT00000044628 | chr13:39816094-39822440 | - | 442  |
| OTTHUMG00000016772 | OTTHUMT00000044629 | chr13:39923131-39953143 | - | 697  |
| OTTHUMG00000016772 | OTTHUMT00000044630 | chr13:39924794-39932546 | - | 181  |
| OTTHUMG00000016801 | OTTHUMT00000044693 | chr13:41515863-41516383 | - | 361  |
| OTTHUMG00000016810 | OTTHUMT00000044706 | chr13:42283973-42284428 | + | 190  |
| OTTHUMG00000016811 | OTTHUMT00000044707 | chr13:42314550-42315023 | - | 225  |
| OTTHUMG00000016815 | OTTHUMT00000044714 | chr13:42630767-42631602 | + | 545  |
| OTTHUMG00000016827 | OTTHUMT00000044728 | chr13:43494624-43502073 | + | 1882 |
| OTTHUMG00000016827 | OTTHUMT00000044729 | chr13:43497455-43502073 | + | 3206 |

|                     |                     |                         |   |      |
|---------------------|---------------------|-------------------------|---|------|
| OTTHUMG00000016828  | OTTHUMT00000044730  | chr13:43578514-43609372 | - | 337  |
| OTTHUMG00000016832  | OTTHUMT00000044735  | chr13:43704061-43708195 | - | 321  |
| OTTHUMG00000016834  | OTTHUMT00000044739  | chr13:43872487-43878002 | - | 856  |
| OTTHUMG00000016839  | OTTHUMT00000044747  | chr13:44123948-44173152 | + | 292  |
| OTTHUMG00000016840  | OTTHUMT00000044748  | chr13:44271639-44281766 | - | 2033 |
| OTTHUMG00000016843  | OTTHUMT00000044756  | chr13:44518725-44555260 | + | 238  |
| OTTHUMG00000016847  | OTTHUMT00000044765  | chr13:44816514-44817045 | + | 223  |
| OTTHUMG00000016846  | OTTHUMT00000044764  | chr13:44822458-44823485 | + | 308  |
| OTTHUMG00000016850  | OTTHUMT00000044770  | chr13:44847069-44853297 | + | 2370 |
| OTTHUMG00000016859  | OTTHUMT00000044784  | chr13:45153226-45154555 | - | 518  |
| OTTHUMG00000016875  | OTTHUMT00000044822  | chr13:45927489-45930374 | - | 560  |
| OTTHUMG00000016885  | OTTHUMT00000044839  | chr13:47297466-47308092 | - | 408  |
| OTTHUMG00000016886  | OTTHUMT00000044840  | chr13:47377465-47379493 | - | 212  |
| OTTHUMG00000016904  | OTTHUMT00000044892  | chr13:48042776-48045454 | - | 411  |
| OTTHUMG00000016905  | OTTHUMT00000044893  | chr13:48049111-48050225 | - | 960  |
| OTTHUMG00000016929  | OTTHUMT00000044963  | chr13:49536817-49538736 | + | 785  |
| OTTHUMG00000016932  | OTTHUMT00000044966  | chr13:49993070-49999586 | - | 728  |
| OTTHUMG00000016940  | OTTHUMT00000045015  | chr13:50476390-50479997 | - | 527  |
| OTTHUMG00000016939  | OTTHUMT00000045013  | chr13:50555938-50557536 | + | 604  |
| OTTHUMG000000153575 | OTTHUMT000000331673 | chr13:50557561-50583079 | - | 428  |
| OTTHUMG00000016974  | OTTHUMT00000045100  | chr13:51956297-51956816 | - | 283  |
| OTTHUMG00000016975  | OTTHUMT00000045101  | chr13:51961129-51971280 | + | 669  |
| OTTHUMG00000016975  | OTTHUMT00000045102  | chr13:51961129-51971441 | + | 718  |
| OTTHUMG00000016983  | OTTHUMT00000045115  | chr13:52618675-52623944 | - | 574  |
| OTTHUMG00000016984  | OTTHUMT00000045118  | chr13:53587925-53605002 | - | 1053 |
| OTTHUMG00000016984  | OTTHUMT00000045116  | chr13:53596460-53604749 | - | 1028 |
| OTTHUMG00000016984  | OTTHUMT00000045117  | chr13:53598998-53605002 | - | 1017 |
| OTTHUMG00000016997  | OTTHUMT00000045157  | chr13:57683826-57705252 | + | 800  |
| OTTHUMG00000017005  | OTTHUMT00000045171  | chr13:59686487-59687081 | - | 417  |
| OTTHUMG00000017008  | OTTHUMT00000045180  | chr13:60157334-60166203 | + | 400  |
| OTTHUMG00000017008  | OTTHUMT00000045179  | chr13:60157334-60166663 | + | 321  |
| OTTHUMG00000017010  | OTTHUMT00000045182  | chr13:60389177-60390140 | + | 401  |
| OTTHUMG00000017014  | OTTHUMT00000045186  | chr13:61476227-61501682 | - | 706  |
| OTTHUMG00000017017  | OTTHUMT00000045189  | chr13:61696231-61722081 | + | 315  |
| OTTHUMG00000017016  | OTTHUMT00000045188  | chr13:61793439-61794532 | + | 553  |
| OTTHUMG00000017019  | OTTHUMT00000045191  | chr13:62144419-62204314 | - | 429  |
| OTTHUMG00000017019  | OTTHUMT00000045192  | chr13:62203994-62204493 | - | 400  |
| OTTHUMG00000017020  | OTTHUMT00000045193  | chr13:62655235-62699190 | - | 345  |
| OTTHUMG00000017022  | OTTHUMT00000045196  | chr13:63139815-63189152 | - | 402  |
| OTTHUMG00000017022  | OTTHUMT00000045195  | chr13:63139816-63210152 | - | 411  |
| OTTHUMG00000017023  | OTTHUMT00000045197  | chr13:63220133-63223214 | + | 774  |
| OTTHUMG00000017025  | OTTHUMT00000045199  | chr13:63300903-63303986 | - | 788  |
| OTTHUMG00000017028  | OTTHUMT00000045202  | chr13:63458505-63548145 | - | 1872 |
| OTTHUMG00000017032  | OTTHUMT00000045206  | chr13:65338307-65350352 | + | 493  |
| OTTHUMG00000017041  | OTTHUMT00000045216  | chr13:66844520-66852109 | + | 608  |

|                    |                    |                         |   |      |
|--------------------|--------------------|-------------------------|---|------|
| OTTHUMG00000017052 | OTTHUMT00000045227 | chr13:68694479-68764287 | + | 813  |
| OTTHUMG00000017053 | OTTHUMT00000045228 | chr13:68783466-68794234 | + | 819  |
| OTTHUMG00000017059 | OTTHUMT00000045235 | chr13:70487274-70640550 | + | 944  |
| OTTHUMG00000017077 | OTTHUMT00000045269 | chr13:72885611-73018979 | - | 280  |
| OTTHUMG00000017077 | OTTHUMT00000045270 | chr13:73018526-73120391 | - | 483  |
| OTTHUMG00000017076 | OTTHUMT00000045268 | chr13:73036382-73060208 | + | 554  |
| OTTHUMG00000017079 | OTTHUMT00000045273 | chr13:73703595-73732114 | + | 3338 |
| OTTHUMG00000017081 | OTTHUMT00000045275 | chr13:73891311-73907297 | + | 722  |
| OTTHUMG00000017082 | OTTHUMT00000045276 | chr13:74024981-74028022 | + | 822  |
| OTTHUMG00000017082 | OTTHUMT00000045277 | chr13:74024988-74027974 | + | 811  |
| OTTHUMG00000017086 | OTTHUMT00000045281 | chr13:74722617-74724149 | + | 385  |
| OTTHUMG00000017095 | OTTHUMT00000045308 | chr13:75485160-75486638 | + | 275  |
| OTTHUMG00000017108 | OTTHUMT00000045342 | chr13:77134636-77135276 | + | 516  |
| OTTHUMG00000017113 | OTTHUMT00000045353 | chr13:77300358-77306086 | + | 596  |
| OTTHUMG00000017112 | OTTHUMT00000045352 | chr13:77461508-77462782 | - | 544  |
| OTTHUMG00000017115 | OTTHUMT00000045356 | chr13:77502116-77509355 | + | 244  |
| OTTHUMG00000017115 | OTTHUMT00000045355 | chr13:77503072-77509355 | + | 205  |
| OTTHUMG00000017116 | OTTHUMT00000045357 | chr13:77661744-77746473 | + | 172  |
| OTTHUMG00000017117 | OTTHUMT00000045358 | chr13:77747856-77749650 | - | 340  |
| OTTHUMG00000017124 | OTTHUMT00000045365 | chr13:78259455-78264443 | - | 373  |
| OTTHUMG00000017135 | OTTHUMT00000045379 | chr13:79038882-79042984 | - | 346  |
| OTTHUMG00000017137 | OTTHUMT00000045383 | chr13:79276554-79277821 | + | 426  |
| OTTHUMG00000017139 | OTTHUMT00000045385 | chr13:79344722-79390080 | + | 884  |
| OTTHUMG00000017144 | OTTHUMT00000045391 | chr13:80515806-80516578 | + | 655  |
| OTTHUMG00000017146 | OTTHUMT00000045393 | chr13:80755309-80774543 | + | 286  |
| OTTHUMG00000017154 | OTTHUMT00000045401 | chr13:84034500-84035372 | + | 610  |
| OTTHUMG00000017155 | OTTHUMT00000045402 | chr13:84537223-84551056 | - | 596  |
| OTTHUMG00000017156 | OTTHUMT00000045403 | chr13:84835737-85016706 | + | 909  |
| OTTHUMG00000017159 | OTTHUMT00000045406 | chr13:85532949-85643026 | + | 191  |
| OTTHUMG00000017162 | OTTHUMT00000045409 | chr13:86362174-86387063 | + | 294  |
| OTTHUMG00000017165 | OTTHUMT00000045412 | chr13:86877470-86878529 | - | 508  |
| OTTHUMG00000017166 | OTTHUMT00000045413 | chr13:86894248-87121219 | - | 1664 |
| OTTHUMG00000017166 | OTTHUMT00000045414 | chr13:87035114-87121515 | - | 837  |
| OTTHUMG00000017166 | OTTHUMT00000045415 | chr13:87065819-87121362 | - | 612  |
| OTTHUMG00000017169 | OTTHUMT00000045418 | chr13:87251292-87254064 | + | 341  |
| OTTHUMG00000017171 | OTTHUMT00000045420 | chr13:87991120-87992762 | + | 885  |
| OTTHUMG00000017171 | OTTHUMT00000045421 | chr13:87992541-87995765 | + | 305  |
| OTTHUMG00000017173 | OTTHUMT00000045423 | chr13:88665102-88687145 | - | 773  |
| OTTHUMG00000017173 | OTTHUMT00000045424 | chr13:88665151-88670814 | - | 683  |
| OTTHUMG00000017175 | OTTHUMT00000045426 | chr13:88723458-88730495 | + | 732  |
| OTTHUMG00000017177 | OTTHUMT00000045428 | chr13:88927863-88950764 | - | 664  |
| OTTHUMG00000017179 | OTTHUMT00000045431 | chr13:88998946-89004059 | - | 682  |
| OTTHUMG00000017179 | OTTHUMT00000045430 | chr13:89001488-89002644 | - | 328  |
| OTTHUMG00000017184 | OTTHUMT00000045436 | chr13:89943542-89985335 | + | 736  |
| OTTHUMG00000017185 | OTTHUMT00000045437 | chr13:90341209-90376852 | - | 2012 |

|                     |                     |                           |   |      |
|---------------------|---------------------|---------------------------|---|------|
| OTTHUMG00000017187  | OTTHUMT00000045439  | chr13:90537509-90539848   | - | 351  |
| OTTHUMG00000017188  | OTTHUMT00000045441  | chr13:90577868-90581662   | - | 429  |
| OTTHUMG00000017188  | OTTHUMT00000045440  | chr13:90577907-90581620   | - | 461  |
| OTTHUMG00000017195  | OTTHUMT00000045448  | chr13:90798075-90804834   | + | 927  |
| OTTHUMG00000017201  | OTTHUMT00000045456  | chr13:92506911-92508180   | + | 208  |
| OTTHUMG00000017212  | OTTHUMT00000045470  | chr13:94149949-94153117   | - | 1841 |
| OTTHUMG00000017215  | OTTHUMT00000045477  | chr13:94752706-94754402   | - | 1014 |
| OTTHUMG00000017237  | OTTHUMT00000045522  | chr13:96622724-96629877   | - | 690  |
| OTTHUMG00000017241  | OTTHUMT00000045530  | chr13:97125266-97128218   | - | 690  |
| OTTHUMG00000017271  | OTTHUMT00000045601  | chr13:98941538-98942752   | - | 333  |
| OTTHUMG00000017273  | OTTHUMT00000045606  | chr13:99027367-99030623   | + | 649  |
| OTTHUMG00000017293  | OTTHUMT00000045661  | chr13:100391117-100394619 | - | 459  |
| OTTHUMG00000017311  | OTTHUMT00000045714  | chr13:102193341-102195575 | + | 1945 |
| OTTHUMG00000017308  | OTTHUMT00000045702  | chr13:102330287-102331518 | + | 359  |
| OTTHUMG00000017314  | OTTHUMT00000045717  | chr13:102875551-102878036 | + | 490  |
| OTTHUMG00000017317  | OTTHUMT00000045720  | chr13:105157219-105212145 | + | 1232 |
| OTTHUMG00000017317  | OTTHUMT00000045721  | chr13:105157826-105211748 | + | 576  |
| OTTHUMG00000017318  | OTTHUMT00000045722  | chr13:105180236-105182064 | + | 482  |
| OTTHUMG00000017319  | OTTHUMT00000045724  | chr13:105826912-105827724 | + | 494  |
| OTTHUMG00000017319  | OTTHUMT00000045723  | chr13:105826912-105828566 | + | 628  |
| OTTHUMG00000017319  | OTTHUMT00000045725  | chr13:105827141-105827994 | + | 737  |
| OTTHUMG00000017334  | OTTHUMT00000045751  | chr13:108732322-108738082 | + | 696  |
| OTTHUMG00000017336  | OTTHUMT00000045753  | chr13:108760484-108762122 | + | 662  |
| OTTHUMG00000017337  | OTTHUMT00000045754  | chr13:108851044-108851989 | + | 412  |
| OTTHUMG00000017340  | OTTHUMT00000045757  | chr13:109178630-109180355 | + | 471  |
| OTTHUMG00000017341  | OTTHUMT00000045758  | chr13:109503633-109505300 | + | 433  |
| OTTHUMG00000017351  | OTTHUMT00000045793  | chr13:110433655-110440912 | + | 682  |
| OTTHUMG00000017352  | OTTHUMT00000045794  | chr13:110546186-110553445 | + | 647  |
| OTTHUMG00000017361  | OTTHUMT00000045816  | chr13:111602300-111603491 | + | 374  |
| OTTHUMG00000017361  | OTTHUMT00000045815  | chr13:111602303-111603251 | + | 345  |
| OTTHUMG00000017364  | OTTHUMT00000045819  | chr13:111808410-111809197 | - | 426  |
| OTTHUMG00000017363  | OTTHUMT00000045818  | chr13:111809434-111810330 | + | 543  |
| OTTHUMG00000017366  | OTTHUMT00000045824  | chr13:112024882-112033540 | - | 654  |
| OTTHUMG00000017393  | OTTHUMT00000045944  | chr13:113525635-113527303 | - | 523  |
| OTTHUMG00000017392  | OTTHUMT00000045941  | chr13:113527415-113531717 | + | 559  |
| OTTHUMG00000017392  | OTTHUMT00000045942  | chr13:113529478-113532270 | + | 776  |
| OTTHUMG00000017392  | OTTHUMT00000045943  | chr13:113529484-113530438 | + | 501  |
| OTTHUMG00000017397  | OTTHUMT00000045950  | chr13:113531594-113533362 | - | 342  |
| OTTHUMG00000017405  | OTTHUMT00000045980  | chr13:114113136-114117525 | - | 511  |
| OTTHUMG000000133700 | OTTHUMT000000316369 | chr14:52905849-53062710   | + | 551  |
| OTTHUMG000000133689 | OTTHUMT000000257940 | chr14:53136300-53150494   | - | 724  |
| OTTHUMG000000150105 | OTTHUMT000000316372 | chr14:53305410-53387350   | - | 598  |
| OTTHUMG00000028948  | OTTHUMT00000072281  | chr14:59456184-59600030   | + | 4867 |
| OTTHUMG000000149923 | OTTHUMT000000313932 | chr14:89991327-89994963   | + | 666  |
| OTTHUMG000000149923 | OTTHUMT000000313930 | chr14:89991368-89995001   | + | 2023 |

|                    |                    |                           |   |      |
|--------------------|--------------------|---------------------------|---|------|
| OTTHUMG00000149923 | OTTHUMT00000313931 | chr14:89991426-89995002   | + | 1373 |
| OTTHUMG00000150113 | OTTHUMT00000316408 | chr14:98380986-98381687   | + | 476  |
| OTTHUMG00000150114 | OTTHUMT00000316409 | chr14:98694506-98695759   | + | 559  |
| OTTHUMG00000029060 | OTTHUMT00000072585 | chr14:100485068-100488842 | + | 605  |
| OTTHUMG00000029060 | OTTHUMT00000072580 | chr14:100485068-100492267 | + | 732  |
| OTTHUMG00000029060 | OTTHUMT00000072587 | chr14:100485068-100494640 | + | 792  |
| OTTHUMG00000029060 | OTTHUMT00000072584 | chr14:100493191-100496263 | + | 513  |
| OTTHUMG00000067435 | OTTHUMT00000144425 | chr14:100496916-100501856 | + | 504  |
| OTTHUMG00000067436 | OTTHUMT00000144426 | chr14:100497117-100503130 | + | 621  |
| OTTHUMG00000029067 | OTTHUMT00000072600 | chr14:100606001-100609024 | + | 2636 |
| OTTHUMG00000029067 | OTTHUMT00000072602 | chr14:100606577-100609024 | + | 2401 |
| OTTHUMG00000029067 | OTTHUMT00000072601 | chr14:100607897-100608648 | + | 383  |
| OTTHUMG00000045024 | OTTHUMT00000104668 | chr14:100610054-100613761 | - | 516  |
| OTTHUMG00000056663 | OTTHUMT00000126738 | chr15:23281071-23375031   | - | 2487 |
| OTTHUMG00000056666 | OTTHUMT00000126742 | chr15:24191312-24243014   | + | 603  |
| OTTHUMG00000056666 | OTTHUMT00000126741 | chr15:24229614-24242841   | + | 514  |
| OTTHUMG00000133525 | OTTHUMT00000257500 | chr15:82659068-82689726   | - | 2538 |
| OTTHUMG00000133525 | OTTHUMT00000257498 | chr15:82659068-82689892   | - | 2518 |
| OTTHUMG00000133525 | OTTHUMT00000257499 | chr15:82659069-82689894   | - | 2845 |
| OTTHUMG00000131587 | OTTHUMT00000254468 | chr16:21927031-22006356   | + | 1352 |
| OTTHUMG00000060108 | OTTHUMT00000133428 | chr16:26236968-26241803   | + | 893  |
| OTTHUMG00000060108 | OTTHUMT00000133427 | chr16:26236968-26253250   | + | 451  |
| OTTHUMG00000060108 | OTTHUMT00000156139 | chr16:26241050-26253212   | + | 391  |
| OTTHUMG00000060136 | OTTHUMT00000133457 | chr16:26503577-26513635   | - | 292  |
| OTTHUMG00000132462 | OTTHUMT00000314297 | chr16:31623102-31624840   | + | 579  |
| OTTHUMG00000132462 | OTTHUMT00000314298 | chr16:31624492-31626173   | + | 719  |
| OTTHUMG00000150106 | OTTHUMT00000316376 | chr16:61187777-61189854   | + | 556  |
| OTTHUMG00000137643 | OTTHUMT00000269085 | chr16:83874065-83877070   | + | 1564 |
| OTTHUMG00000133563 | OTTHUMT00000257641 | chr16:87753129-87757584   | + | 2239 |
| OTTHUMG00000132133 | OTTHUMT00000255178 | chr17:33615-37038         | - | 785  |
| OTTHUMG00000132866 | OTTHUMT00000256341 | chr17:8064685-8068086     | - | 2079 |
| OTTHUMG00000132847 | OTTHUMT00000256321 | chr17:10638955-10648079   | - | 1466 |
| OTTHUMG00000058766 | OTTHUMT00000129946 | chr17:12394011-12481229   | + | 2762 |
| OTTHUMG00000058770 | OTTHUMT00000129954 | chr17:13143226-13150802   | - | 480  |
| OTTHUMG00000058771 | OTTHUMT00000129955 | chr17:13620676-13636592   | - | 2996 |
| OTTHUMG00000058802 | OTTHUMT00000129988 | chr17:13776762-13784636   | - | 402  |
| OTTHUMG00000058806 | OTTHUMT00000129994 | chr17:13868527-13869706   | + | 642  |
| OTTHUMG00000058806 | OTTHUMT00000129993 | chr17:13868538-13869716   | + | 765  |
| OTTHUMG00000058809 | OTTHUMT00000129997 | chr17:14054530-14061964   | + | 1534 |
| OTTHUMG00000058807 | OTTHUMT00000129995 | chr17:14103976-14109601   | + | 515  |
| OTTHUMG00000058811 | OTTHUMT00000130000 | chr17:14218181-14265068   | + | 799  |
| OTTHUMG00000058813 | OTTHUMT00000130002 | chr17:14569771-14573728   | + | 230  |
| OTTHUMG00000058804 | OTTHUMT00000129991 | chr17:14682004-14744596   | + | 624  |
| OTTHUMG00000058962 | OTTHUMT00000130382 | chr17:15111503-15116332   | - | 1771 |
| OTTHUMG00000058964 | OTTHUMT00000130384 | chr17:15120604-15123519   | - | 342  |

|                    |                    |                         |   |      |
|--------------------|--------------------|-------------------------|---|------|
| OTTHUMG0000059147  | OTTHUMT00000131039 | chr17:15650705-15661668 | - | 410  |
| OTTHUMG0000059261  | OTTHUMT00000131473 | chr17:16820038-16825392 | - | 2198 |
| OTTHUMG0000059602  | OTTHUMT00000132550 | chr17:19262940-19268262 | + | 518  |
| OTTHUMG0000059607  | OTTHUMT00000132556 | chr17:19300995-19302296 | - | 523  |
| OTTHUMG0000059606  | OTTHUMT00000132555 | chr17:19315024-19336814 | - | 431  |
| OTTHUMG0000059465  | OTTHUMT00000132249 | chr17:19473356-19477730 | + | 1146 |
| OTTHUMG00000130762 | OTTHUMT00000253268 | chr17:20919461-20934520 | + | 748  |
| OTTHUMG00000132826 | OTTHUMT00000256289 | chr17:24364009-24367656 | + | 222  |
| OTTHUMG00000132826 | OTTHUMT00000256290 | chr17:24366486-24367656 | + | 493  |
| OTTHUMG00000132776 | OTTHUMT00000256182 | chr17:28256793-28257715 | + | 510  |
| OTTHUMG00000132738 | OTTHUMT00000256096 | chr17:29830444-29831060 | + | 319  |
| OTTHUMG00000132738 | OTTHUMT00000256095 | chr17:29830466-29831089 | + | 321  |
| OTTHUMG00000132706 | OTTHUMT00000256004 | chr17:33232982-33236872 | - | 475  |
| OTTHUMG00000133184 | OTTHUMT00000256893 | chr17:34439685-34454720 | + | 3235 |
| OTTHUMG00000133607 | OTTHUMT00000257715 | chr17:36959384-36964273 | - | 2138 |
| OTTHUMG00000132071 | OTTHUMT00000255660 | chr17:44065923-44079151 | - | 537  |
| OTTHUMG00000132071 | OTTHUMT00000255096 | chr17:44068653-44079384 | - | 899  |
| OTTHUMG00000132489 | OTTHUMT00000255664 | chr17:44068900-44071646 | - | 433  |
| OTTHUMG00000132489 | OTTHUMT00000255665 | chr17:44068907-44071471 | - | 376  |
| OTTHUMG00000132354 | OTTHUMT00000255476 | chr17:48294480-48331947 | + | 679  |
| OTTHUMG00000132345 | OTTHUMT00000255467 | chr17:50959324-50993451 | - | 586  |
| OTTHUMG00000132075 | OTTHUMT00000255102 | chr17:60393130-60402148 | - | 3420 |
| OTTHUMG00000132075 | OTTHUMT00000255101 | chr17:60394618-60402156 | - | 2255 |
| OTTHUMG00000132303 | OTTHUMT00000255408 | chr17:63609345-63623253 | + | 703  |
| OTTHUMG00000132249 | OTTHUMT00000255327 | chr17:65102521-65136087 | + | 3082 |
| OTTHUMG00000132247 | OTTHUMT00000255325 | chr17:65469443-65491209 | + | 623  |
| OTTHUMG00000132247 | OTTHUMT00000255324 | chr17:65469498-65491274 | + | 660  |
| OTTHUMG00000132240 | OTTHUMT00000255309 | chr17:67104074-67105014 | + | 559  |
| OTTHUMG00000132240 | OTTHUMT00000255310 | chr17:67104212-67105015 | + | 430  |
| OTTHUMG00000132237 | OTTHUMT00000255305 | chr17:67529587-67533733 | - | 378  |
| OTTHUMG00000132234 | OTTHUMT00000255302 | chr17:67578779-67623752 | - | 3025 |
| OTTHUMG00000132234 | OTTHUMT00000255301 | chr17:67578779-67744939 | - | 2045 |
| OTTHUMG00000132235 | OTTHUMT00000255303 | chr17:67580069-67601217 | + | 2057 |
| OTTHUMG00000132231 | OTTHUMT00000255297 | chr17:67598195-67649516 | - | 740  |
| OTTHUMG00000132231 | OTTHUMT00000255296 | chr17:67598557-67618284 | - | 441  |
| OTTHUMG00000132231 | OTTHUMT00000255295 | chr17:67617914-67618460 | - | 392  |
| OTTHUMG00000132227 | OTTHUMT00000255287 | chr17:67892038-68100538 | - | 1743 |
| OTTHUMG00000132227 | OTTHUMT00000255286 | chr17:67911064-68100536 | - | 1951 |
| OTTHUMG00000132642 | OTTHUMT00000255891 | chr17:73511844-73539525 | + | 512  |
| OTTHUMG00000132645 | OTTHUMT00000255896 | chr17:73823405-73855474 | + | 796  |
| OTTHUMG0000060637  | OTTHUMT00000134071 | chr18:59898223-59967244 | - | 869  |
| OTTHUMG0000060637  | OTTHUMT00000134072 | chr18:59898516-59916824 | - | 336  |
| OTTHUMG0000060637  | OTTHUMT00000134073 | chr18:59957667-59967088 | - | 215  |
| OTTHUMG0000060638  | OTTHUMT00000134074 | chr18:59965423-59977508 | + | 634  |
| OTTHUMG0000060638  | OTTHUMT00000134075 | chr18:59974429-59977513 | + | 384  |



|                    |                    |                         |   |      |
|--------------------|--------------------|-------------------------|---|------|
| OTTHUMG0000048095  | OTTHUMT00000109453 | chr19:40589327-40592235 | + | 471  |
| OTTHUMG0000048097  | OTTHUMT00000109455 | chr19:40615699-40616560 | - | 374  |
| OTTHUMG0000048109  | OTTHUMT00000109475 | chr19:40780649-40784243 | + | 359  |
| OTTHUMG0000048114  | OTTHUMT00000109485 | chr19:40890112-40890998 | + | 345  |
| OTTHUMG0000048167  | OTTHUMT00000109585 | chr19:42434668-42439261 | + | 459  |
| OTTHUMG00000141285 | OTTHUMT00000280514 | chr19:44861854-44868848 | + | 2556 |
| OTTHUMG00000141285 | OTTHUMT00000280515 | chr19:44861873-44867731 | + | 1805 |
| OTTHUMG00000141285 | OTTHUMT00000280516 | chr19:44867724-44877057 | + | 287  |
| OTTHUMG00000151543 | OTTHUMT00000323071 | chr19:48349271-48356854 | + | 497  |
| OTTHUMG00000151543 | OTTHUMT00000323072 | chr19:48349505-48351151 | + | 546  |
| OTTHUMG0000064912  | OTTHUMT00000139382 | chr19:59270029-59271625 | - | 527  |
| OTTHUMG0000065934  | OTTHUMT00000141240 | chr19:59913803-59916767 | + | 607  |
| OTTHUMG00000151377 | OTTHUMT00000322421 | chr2:187569-192605      | + | 4773 |
| OTTHUMG00000151363 | OTTHUMT00000322389 | chr2:295841-297157      | - | 443  |
| OTTHUMG00000151363 | OTTHUMT00000322388 | chr2:296059-299379      | - | 588  |
| OTTHUMG00000151365 | OTTHUMT00000322392 | chr2:307912-326465      | + | 843  |
| OTTHUMG00000151365 | OTTHUMT00000322393 | chr2:308053-332118      | + | 848  |
| OTTHUMG00000151367 | OTTHUMT00000322402 | chr2:378412-406885      | + | 547  |
| OTTHUMG00000151358 | OTTHUMT00000322349 | chr2:411057-412156      | + | 422  |
| OTTHUMG00000151358 | OTTHUMT00000322348 | chr2:411133-412303      | + | 596  |
| OTTHUMG00000151362 | OTTHUMT00000322387 | chr2:480944-482655      | - | 508  |
| OTTHUMG00000151361 | OTTHUMT00000322386 | chr2:535805-536667      | + | 658  |
| OTTHUMG00000151360 | OTTHUMT00000322385 | chr2:548204-568145      | + | 757  |
| OTTHUMG00000151375 | OTTHUMT00000322419 | chr2:682083-683235      | - | 569  |
| OTTHUMG00000151379 | OTTHUMT00000322425 | chr2:714966-721195      | - | 491  |
| OTTHUMG00000151379 | OTTHUMT00000322424 | chr2:719306-721224      | - | 387  |
| OTTHUMG00000151376 | OTTHUMT00000322420 | chr2:731977-739856      | + | 254  |
| OTTHUMG00000151380 | OTTHUMT00000322426 | chr2:732488-737767      | + | 533  |
| OTTHUMG00000151368 | OTTHUMT00000322403 | chr2:769837-854112      | - | 1517 |
| OTTHUMG00000151368 | OTTHUMT00000322404 | chr2:770348-853877      | - | 533  |
| OTTHUMG00000151369 | OTTHUMT00000322405 | chr2:885902-891137      | - | 690  |
| OTTHUMG00000151369 | OTTHUMT00000322406 | chr2:887183-890983      | - | 365  |
| OTTHUMG00000151383 | OTTHUMT00000322440 | chr2:1529444-1602892    | - | 783  |
| OTTHUMG00000151384 | OTTHUMT00000322441 | chr2:1555333-1563090    | + | 553  |
| OTTHUMG00000151382 | OTTHUMT00000322439 | chr2:1603289-1608198    | - | 1639 |
| OTTHUMG00000151395 | OTTHUMT00000322466 | chr2:2624768-2639409    | - | 545  |
| OTTHUMG00000151394 | OTTHUMT00000322465 | chr2:2712687-2713736    | - | 366  |
| OTTHUMG00000151393 | OTTHUMT00000322464 | chr2:2817043-2821170    | - | 571  |
| OTTHUMG00000151428 | OTTHUMT00000322598 | chr2:2853337-2854010    | - | 576  |
| OTTHUMG00000151432 | OTTHUMT00000322624 | chr2:2854870-2855536    | + | 470  |
| OTTHUMG00000151432 | OTTHUMT00000322625 | chr2:2854917-2855536    | + | 442  |
| OTTHUMG00000151427 | OTTHUMT00000322597 | chr2:2877827-3108805    | - | 2337 |
| OTTHUMG00000151429 | OTTHUMT00000322600 | chr2:3114360-3115884    | - | 716  |
| OTTHUMG00000151429 | OTTHUMT00000322599 | chr2:3114764-3128558    | - | 414  |
| OTTHUMG00000151435 | OTTHUMT00000322641 | chr2:3139534-3140575    | + | 432  |

|                    |                    |                        |   |      |
|--------------------|--------------------|------------------------|---|------|
| OTTHUMG00000151491 | OTTHUMT00000322867 | chr2:3869649-3872876   | + | 715  |
| OTTHUMG00000151486 | OTTHUMT00000322859 | chr2:3983120-3999535   | - | 2451 |
| OTTHUMG00000151486 | OTTHUMT00000322858 | chr2:3985116-3999484   | - | 1470 |
| OTTHUMG00000151486 | OTTHUMT00000322860 | chr2:3985727-3999492   | - | 809  |
| OTTHUMG00000151486 | OTTHUMT00000322861 | chr2:3998310-3999160   | - | 379  |
| OTTHUMG00000151486 | OTTHUMT00000322862 | chr2:3998311-3999143   | - | 389  |
| OTTHUMG00000151487 | OTTHUMT00000322863 | chr2:4162109-4166196   | - | 604  |
| OTTHUMG00000151581 | OTTHUMT00000323189 | chr2:4653687-4681680   | - | 2658 |
| OTTHUMG00000151581 | OTTHUMT00000323191 | chr2:4655665-4668820   | - | 625  |
| OTTHUMG00000151581 | OTTHUMT00000323190 | chr2:4655665-4681668   | - | 503  |
| OTTHUMG00000151420 | OTTHUMT00000322559 | chr2:5607363-5613614   | - | 317  |
| OTTHUMG00000151424 | OTTHUMT00000322563 | chr2:5660088-5749071   | - | 466  |
| OTTHUMG00000151425 | OTTHUMT00000322564 | chr2:5675910-5748701   | - | 1051 |
| OTTHUMG00000151425 | OTTHUMT00000322565 | chr2:5734725-5748629   | - | 240  |
| OTTHUMG00000151422 | OTTHUMT00000322561 | chr2:5784032-5787925   | + | 1744 |
| OTTHUMG00000151421 | OTTHUMT00000322560 | chr2:5868224-5870179   | - | 407  |
| OTTHUMG00000151460 | OTTHUMT00000322747 | chr2:6370537-6383229   | - | 576  |
| OTTHUMG00000151457 | OTTHUMT00000322744 | chr2:6423593-6433005   | - | 4206 |
| OTTHUMG00000151632 | OTTHUMT00000323351 | chr2:6683692-6691370   | - | 291  |
| OTTHUMG00000151632 | OTTHUMT00000323352 | chr2:6683695-6692289   | - | 537  |
| OTTHUMG00000151631 | OTTHUMT00000323349 | chr2:6696706-6708102   | - | 567  |
| OTTHUMG00000151631 | OTTHUMT00000323695 | chr2:6706688-6707893   | - | 421  |
| OTTHUMG00000151631 | OTTHUMT00000323350 | chr2:6706688-6708027   | - | 614  |
| OTTHUMG00000151631 | OTTHUMT00000323694 | chr2:6706689-6707826   | - | 356  |
| OTTHUMG00000151630 | OTTHUMT00000323348 | chr2:6785760-6788905   | - | 420  |
| OTTHUMG00000151630 | OTTHUMT00000323347 | chr2:6786751-6788809   | - | 599  |
| OTTHUMG00000151630 | OTTHUMT00000323346 | chr2:6786751-6827893   | - | 2125 |
| OTTHUMG00000151730 | OTTHUMT00000323697 | chr2:6886096-6891113   | - | 796  |
| OTTHUMG00000151730 | OTTHUMT00000323698 | chr2:6886462-6898046   | - | 502  |
| OTTHUMG00000151592 | OTTHUMT00000323246 | chr2:7729186-7729828   | - | 467  |
| OTTHUMG00000151591 | OTTHUMT00000323245 | chr2:7783383-7788287   | + | 241  |
| OTTHUMG00000151596 | OTTHUMT00000323256 | chr2:8196983-8200850   | + | 445  |
| OTTHUMG00000151623 | OTTHUMT00000323303 | chr2:8601173-8633082   | - | 1033 |
| OTTHUMG00000151622 | OTTHUMT00000323302 | chr2:8617414-8641373   | - | 8833 |
| OTTHUMG00000151622 | OTTHUMT00000323326 | chr2:8627912-8634536   | - | 294  |
| OTTHUMG00000151626 | OTTHUMT00000323324 | chr2:8782855-8784798   | - | 409  |
| OTTHUMG00000151821 | OTTHUMT00000324050 | chr2:11415092-11423213 | - | 1059 |
| OTTHUMG00000151819 | OTTHUMT00000324048 | chr2:11445600-11447944 | - | 623  |
| OTTHUMG00000151818 | OTTHUMT00000324044 | chr2:11451558-11459823 | + | 496  |
| OTTHUMG00000151818 | OTTHUMT00000324046 | chr2:11456579-11459685 | + | 486  |
| OTTHUMG00000151818 | OTTHUMT00000324045 | chr2:11456631-11459835 | + | 397  |
| OTTHUMG00000151818 | OTTHUMT00000324047 | chr2:11456746-11459838 | + | 370  |
| OTTHUMG00000151822 | OTTHUMT00000324062 | chr2:11739037-11740900 | + | 1057 |
| OTTHUMG00000151822 | OTTHUMT00000324061 | chr2:11739038-11740905 | + | 1168 |
| OTTHUMG00000151709 | OTTHUMT00000323603 | chr2:11906199-11923861 | + | 556  |

|                    |                    |                        |   |      |
|--------------------|--------------------|------------------------|---|------|
| OTTHUMG00000151709 | OTTHUMT00000323602 | chr2:11923462-12367536 | + | 437  |
| OTTHUMG00000151709 | OTTHUMT00000323599 | chr2:12064693-12189162 | + | 619  |
| OTTHUMG00000151709 | OTTHUMT00000323583 | chr2:12064705-12635925 | + | 2177 |
| OTTHUMG00000151709 | OTTHUMT00000323601 | chr2:12064751-12141195 | + | 318  |
| OTTHUMG00000151709 | OTTHUMT00000323600 | chr2:12164161-12189125 | + | 475  |
| OTTHUMG00000151709 | OTTHUMT00000323598 | chr2:12371894-12618842 | + | 574  |
| OTTHUMG00000151710 | OTTHUMT00000323586 | chr2:12656564-12662722 | + | 395  |
| OTTHUMG00000151714 | OTTHUMT00000323609 | chr2:13595249-13666744 | + | 453  |
| OTTHUMG00000151716 | OTTHUMT00000323616 | chr2:13768107-14458538 | - | 591  |
| OTTHUMG00000151713 | OTTHUMT00000323608 | chr2:13780624-13815728 | + | 829  |
| OTTHUMG00000151716 | OTTHUMT00000323615 | chr2:14286449-14458533 | - | 3499 |
| OTTHUMG00000151715 | OTTHUMT00000323610 | chr2:14674003-14687767 | + | 343  |
| OTTHUMG00000151715 | OTTHUMT00000323611 | chr2:14674003-14687767 | + | 262  |
| OTTHUMG00000151726 | OTTHUMT00000323666 | chr2:14944222-14965239 | - | 464  |
| OTTHUMG00000151725 | OTTHUMT00000323665 | chr2:15621745-15631443 | + | 405  |
| OTTHUMG00000151727 | OTTHUMT00000323667 | chr2:15726259-15738059 | - | 565  |
| OTTHUMG00000151723 | OTTHUMT00000323661 | chr2:15859322-15868452 | - | 485  |
| OTTHUMG00000151751 | OTTHUMT00000323749 | chr2:16054622-16120458 | - | 514  |
| OTTHUMG00000151744 | OTTHUMT00000323739 | chr2:16108000-16143374 | + | 1092 |
| OTTHUMG00000151744 | OTTHUMT00000323740 | chr2:16130971-16138690 | + | 471  |
| OTTHUMG00000151742 | OTTHUMT00000323736 | chr2:16142795-16163414 | - | 638  |
| OTTHUMG00000151742 | OTTHUMT00000323737 | chr2:16153999-16163235 | - | 850  |
| OTTHUMG00000151746 | OTTHUMT00000323742 | chr2:16247179-16248975 | + | 634  |
| OTTHUMG00000151750 | OTTHUMT00000323748 | chr2:16268796-16273889 | + | 836  |
| OTTHUMG00000151749 | OTTHUMT00000323747 | chr2:16271776-16272943 | - | 413  |
| OTTHUMG00000151743 | OTTHUMT00000323738 | chr2:16361073-16364315 | - | 738  |
| OTTHUMG00000151752 | OTTHUMT00000323751 | chr2:16399005-16477451 | + | 314  |
| OTTHUMG00000151752 | OTTHUMT00000323750 | chr2:16399934-16477451 | + | 428  |
| OTTHUMG00000151748 | OTTHUMT00000323745 | chr2:16567925-16574136 | + | 543  |
| OTTHUMG00000151748 | OTTHUMT00000323746 | chr2:16567939-16574187 | + | 542  |
| OTTHUMG00000151740 | OTTHUMT00000323731 | chr2:16772872-16812157 | + | 561  |
| OTTHUMG00000151740 | OTTHUMT00000323730 | chr2:16772872-16812303 | + | 594  |
| OTTHUMG00000151745 | OTTHUMT00000323741 | chr2:17014782-17019245 | + | 198  |
| OTTHUMG0000090675  | OTTHUMT00000323816 | chr2:17842313-17844906 | - | 582  |
| OTTHUMG00000151764 | OTTHUMT00000323820 | chr2:18829554-18832499 | + | 366  |
| OTTHUMG00000151766 | OTTHUMT00000323831 | chr2:19031210-19090207 | - | 1945 |
| OTTHUMG00000151766 | OTTHUMT00000323832 | chr2:19067188-19369296 | - | 566  |
| OTTHUMG00000151766 | OTTHUMT00000323837 | chr2:19089896-19369279 | - | 548  |
| OTTHUMG00000151766 | OTTHUMT00000323836 | chr2:19108103-19409990 | - | 621  |
| OTTHUMG00000151772 | OTTHUMT00000323861 | chr2:19521462-19532203 | - | 1707 |
| OTTHUMG00000151774 | OTTHUMT00000323866 | chr2:19538692-19552092 | + | 751  |
| OTTHUMG00000151775 | OTTHUMT00000323867 | chr2:19774957-19780818 | + | 441  |
| OTTHUMG00000151773 | OTTHUMT00000323864 | chr2:19932102-19940635 | + | 2234 |
| OTTHUMG00000151773 | OTTHUMT00000323862 | chr2:19932116-19948289 | + | 2985 |
| OTTHUMG00000151773 | OTTHUMT00000323865 | chr2:19932133-19935772 | + | 517  |

|                    |                    |                        |   |      |
|--------------------|--------------------|------------------------|---|------|
| OTTHUMG00000151773 | OTTHUMT00000323863 | chr2:19932133-19940777 | + | 2466 |
| OTTHUMG00000151787 | OTTHUMT00000323916 | chr2:20127098-20170071 | - | 744  |
| OTTHUMG00000151780 | OTTHUMT00000323901 | chr2:20514284-20516189 | + | 306  |
| OTTHUMG00000151783 | OTTHUMT00000323904 | chr2:20923012-20924902 | + | 1496 |
| OTTHUMG00000151796 | OTTHUMT00000323950 | chr2:21297552-22047336 | + | 482  |
| OTTHUMG00000151796 | OTTHUMT00000324017 | chr2:21297562-21340463 | + | 502  |
| OTTHUMG00000151793 | OTTHUMT00000323946 | chr2:21394037-21637690 | + | 489  |
| OTTHUMG00000151793 | OTTHUMT00000324012 | chr2:21472453-21479551 | + | 377  |
| OTTHUMG00000151793 | OTTHUMT00000324011 | chr2:21472960-21479551 | + | 580  |
| OTTHUMG00000151806 | OTTHUMT00000324014 | chr2:21706925-21712686 | - | 536  |
| OTTHUMG00000151809 | OTTHUMT00000324019 | chr2:21714808-21725879 | - | 371  |
| OTTHUMG00000151809 | OTTHUMT00000324018 | chr2:21714808-21725940 | - | 545  |
| OTTHUMG00000151807 | OTTHUMT00000324015 | chr2:21763811-21787000 | - | 2095 |
| OTTHUMG00000151805 | OTTHUMT00000324013 | chr2:22020986-22041928 | - | 577  |
| OTTHUMG00000151815 | OTTHUMT00000324041 | chr2:22453971-22558381 | + | 565  |
| OTTHUMG00000151816 | OTTHUMT00000324042 | chr2:22612856-22614665 | + | 437  |
| OTTHUMG00000151813 | OTTHUMT00000324038 | chr2:23094502-23167213 | - | 710  |
| OTTHUMG00000151813 | OTTHUMT00000324039 | chr2:23103486-23106798 | - | 530  |
| OTTHUMG00000151813 | OTTHUMT00000324297 | chr2:23106980-23275432 | - | 502  |
| OTTHUMG00000151898 | OTTHUMT00000324314 | chr2:23407040-23408420 | - | 521  |
| OTTHUMG00000151900 | OTTHUMT00000324320 | chr2:23424030-23428240 | + | 890  |
| OTTHUMG00000151905 | OTTHUMT00000324350 | chr2:23433892-23436752 | - | 531  |
| OTTHUMG00000151891 | OTTHUMT00000324284 | chr2:23451605-23457675 | - | 537  |
| OTTHUMG00000151891 | OTTHUMT00000324283 | chr2:23451740-23457631 | - | 566  |
| OTTHUMG00000152010 | OTTHUMT00000324840 | chr2:25280686-25285575 | + | 464  |
| OTTHUMG00000152130 | OTTHUMT00000325375 | chr2:25445546-25452218 | - | 417  |
| OTTHUMG00000151995 | OTTHUMT00000324720 | chr2:26747626-26750836 | - | 564  |
| OTTHUMG00000151996 | OTTHUMT00000324732 | chr2:27126055-27126636 | - | 405  |
| OTTHUMG00000151942 | OTTHUMT00000324542 | chr2:28524538-28526555 | - | 847  |
| OTTHUMG00000152012 | OTTHUMT00000324850 | chr2:28785323-28812575 | - | 724  |
| OTTHUMG00000152012 | OTTHUMT00000324851 | chr2:28785695-28812562 | - | 482  |
| OTTHUMG00000152012 | OTTHUMT00000324852 | chr2:28798810-28812479 | - | 720  |
| OTTHUMG00000152002 | OTTHUMT00000324765 | chr2:30000854-30006332 | + | 803  |
| OTTHUMG00000152052 | OTTHUMT00000325099 | chr2:30423029-30428801 | + | 2183 |
| OTTHUMG00000152056 | OTTHUMT00000325123 | chr2:31872396-31882553 | - | 413  |
| OTTHUMG00000152136 | OTTHUMT00000325401 | chr2:32904014-33005264 | + | 1789 |
| OTTHUMG00000152136 | OTTHUMT00000325403 | chr2:32919585-32980694 | + | 686  |
| OTTHUMG00000152136 | OTTHUMT00000325402 | chr2:32961372-33005093 | + | 1356 |
| OTTHUMG00000152135 | OTTHUMT00000325400 | chr2:33005698-33006976 | + | 479  |
| OTTHUMG00000152139 | OTTHUMT00000325407 | chr2:34145797-34148121 | + | 594  |
| OTTHUMG00000152141 | OTTHUMT00000325415 | chr2:34462359-34713911 | + | 564  |
| OTTHUMG00000152144 | OTTHUMT00000325418 | chr2:34756150-34801134 | + | 1106 |
| OTTHUMG00000152144 | OTTHUMT00000325419 | chr2:34792161-34816802 | + | 1202 |
| OTTHUMG00000152140 | OTTHUMT00000325414 | chr2:34813546-34815687 | + | 167  |
| OTTHUMG00000152143 | OTTHUMT00000325417 | chr2:34878421-35241682 | + | 574  |

|                    |                    |                        |   |      |
|--------------------|--------------------|------------------------|---|------|
| OTTHUMG00000152142 | OTTHUMT00000325416 | chr2:35076849-35078731 | - | 491  |
| OTTHUMG00000152509 | OTTHUMT00000326529 | chr2:37405987-37407444 | + | 502  |
| OTTHUMG00000152558 | OTTHUMT00000326759 | chr2:37824980-37827693 | + | 382  |
| OTTHUMG00000152169 | OTTHUMT00000326757 | chr2:37906894-37910079 | - | 1920 |
| OTTHUMG00000152169 | OTTHUMT00000326756 | chr2:37908256-37956510 | - | 658  |
| OTTHUMG00000152169 | OTTHUMT00000325579 | chr2:37920685-37956921 | - | 548  |
| OTTHUMG00000153433 | OTTHUMT00000331179 | chr2:38511940-38514219 | + | 378  |
| OTTHUMG00000152401 | OTTHUMT00000326080 | chr2:40827131-40848096 | + | 545  |
| OTTHUMG00000152302 | OTTHUMT00000325744 | chr2:41957718-41958599 | - | 532  |
| OTTHUMG00000152301 | OTTHUMT00000325742 | chr2:41958199-41974683 | + | 1800 |
| OTTHUMG00000152301 | OTTHUMT00000325743 | chr2:41958200-41973690 | + | 739  |
| OTTHUMG00000152505 | OTTHUMT00000325751 | chr2:42012243-42014109 | - | 636  |
| OTTHUMG00000152505 | OTTHUMT00000325752 | chr2:42012263-42014367 | - | 766  |
| OTTHUMG00000152306 | OTTHUMT00000325754 | chr2:42096269-42105946 | - | 343  |
| OTTHUMG00000152656 | OTTHUMT00000327196 | chr2:42446314-42505732 | - | 599  |
| OTTHUMG00000152375 | OTTHUMT00000326020 | chr2:43081966-43086884 | - | 398  |
| OTTHUMG00000152373 | OTTHUMT00000326016 | chr2:43108496-43120186 | - | 2150 |
| OTTHUMG00000152373 | OTTHUMT00000326017 | chr2:43113144-43120190 | - | 799  |
| OTTHUMG00000152373 | OTTHUMT00000326018 | chr2:43113876-43120184 | - | 783  |
| OTTHUMG00000152376 | OTTHUMT00000326021 | chr2:43121836-43124425 | - | 567  |
| OTTHUMG00000152374 | OTTHUMT00000326019 | chr2:43178388-43183333 | - | 950  |
| OTTHUMG00000152420 | OTTHUMT00000326184 | chr2:45001720-45016287 | - | 1450 |
| OTTHUMG00000152420 | OTTHUMT00000326185 | chr2:45003990-45019842 | - | 608  |
| OTTHUMG00000152420 | OTTHUMT00000326186 | chr2:45010507-45016294 | - | 754  |
| OTTHUMG00000152420 | OTTHUMT00000326187 | chr2:45011820-45016082 | - | 459  |
| OTTHUMG00000152422 | OTTHUMT00000326189 | chr2:45035307-45049401 | + | 2677 |
| OTTHUMG00000152444 | OTTHUMT00000326243 | chr2:45093857-45094311 | - | 365  |
| OTTHUMG00000152442 | OTTHUMT00000326240 | chr2:45249226-45250057 | + | 551  |
| OTTHUMG00000153138 | OTTHUMT00000329731 | chr2:46472940-46474810 | - | 567  |
| OTTHUMG00000151712 | OTTHUMT00000323597 | chr2:47306437-47319850 | + | 559  |
| OTTHUMG00000151712 | OTTHUMT00000323596 | chr2:47307560-47319868 | + | 589  |
| OTTHUMG00000151756 | OTTHUMT00000323780 | chr2:48022339-48321626 | - | 1799 |
| OTTHUMG00000151842 | OTTHUMT00000324131 | chr2:51282723-51302406 | - | 496  |
| OTTHUMG00000151842 | OTTHUMT00000324134 | chr2:51282723-51302406 | - | 483  |
| OTTHUMG00000151845 | OTTHUMT00000324138 | chr2:52453760-52470654 | + | 602  |
| OTTHUMG00000152267 | OTTHUMT00000325653 | chr2:52575330-52581394 | - | 635  |
| OTTHUMG00000152414 | OTTHUMT00000326160 | chr2:52944877-52947273 | + | 331  |
| OTTHUMG00000152405 | OTTHUMT00000326132 | chr2:54163195-54165707 | - | 730  |
| OTTHUMG00000152469 | OTTHUMT00000326321 | chr2:54827744-54829045 | - | 395  |
| OTTHUMG00000152122 | OTTHUMT00000325331 | chr2:55705577-55712077 | + | 2384 |
| OTTHUMG00000152029 | OTTHUMT00000324929 | chr2:56043830-56127965 | - | 897  |
| OTTHUMG00000152028 | OTTHUMT00000324928 | chr2:56158056-56171021 | - | 710  |
| OTTHUMG00000152120 | OTTHUMT00000325322 | chr2:58356516-58377187 | + | 810  |
| OTTHUMG00000152616 | OTTHUMT00000327021 | chr2:59515852-59522900 | + | 435  |
| OTTHUMG00000152619 | OTTHUMT00000327027 | chr2:60431234-60433655 | - | 2003 |

|                    |                    |                        |   |      |
|--------------------|--------------------|------------------------|---|------|
| OTTHUMG00000152618 | OTTHUMT00000327025 | chr2:60439855-60472014 | - | 701  |
| OTTHUMG00000152618 | OTTHUMT00000327026 | chr2:60440359-60463675 | - | 466  |
| OTTHUMG00000152523 | OTTHUMT00000326581 | chr2:62543766-62544709 | + | 422  |
| OTTHUMG00000152520 | OTTHUMT00000326578 | chr2:62670894-62743293 | - | 569  |
| OTTHUMG00000152520 | OTTHUMT00000326577 | chr2:62692511-62743267 | - | 924  |
| OTTHUMG00000152631 | OTTHUMT00000327083 | chr2:64166988-64168884 | - | 561  |
| OTTHUMG00000152633 | OTTHUMT00000327085 | chr2:64265716-64286123 | - | 3301 |
| OTTHUMG00000152671 | OTTHUMT00000327286 | chr2:64411124-64412769 | - | 287  |
| OTTHUMG00000152672 | OTTHUMT00000327291 | chr2:64418705-64422285 | - | 402  |
| OTTHUMG00000152676 | OTTHUMT00000327305 | chr2:64566991-64581542 | + | 569  |
| OTTHUMG00000152679 | OTTHUMT00000327323 | chr2:64687613-64696637 | + | 1382 |
| OTTHUMG00000152679 | OTTHUMT00000327324 | chr2:64687999-64697120 | + | 1718 |
| OTTHUMG00000152703 | OTTHUMT00000327469 | chr2:64926768-64944264 | - | 1972 |
| OTTHUMG00000152704 | OTTHUMT00000327471 | chr2:64982478-64985775 | - | 2926 |
| OTTHUMG00000152699 | OTTHUMT00000327462 | chr2:65111365-65118135 | - | 492  |
| OTTHUMG00000152699 | OTTHUMT00000327461 | chr2:65111385-65133655 | - | 1015 |
| OTTHUMG00000152909 | OTTHUMT00000328530 | chr2:66316013-66316849 | - | 364  |
| OTTHUMG00000152908 | OTTHUMT00000328528 | chr2:66407985-66409279 | + | 1022 |
| OTTHUMG00000152808 | OTTHUMT00000328009 | chr2:66407985-66409477 | + | 771  |
| OTTHUMG00000152908 | OTTHUMT00000328529 | chr2:66407997-66409620 | + | 902  |
| OTTHUMG00000152809 | OTTHUMT00000328010 | chr2:66463942-66473086 | + | 1676 |
| OTTHUMG00000152832 | OTTHUMT00000328199 | chr2:66507371-66514106 | - | 703  |
| OTTHUMG00000152839 | OTTHUMT00000328221 | chr2:66777761-66783863 | - | 762  |
| OTTHUMG00000152839 | OTTHUMT00000328222 | chr2:66777794-66783833 | - | 216  |
| OTTHUMG00000152839 | OTTHUMT00000328220 | chr2:66777798-66783833 | - | 409  |
| OTTHUMG00000152853 | OTTHUMT00000328263 | chr2:66985072-67052098 | + | 620  |
| OTTHUMG00000152852 | OTTHUMT00000328261 | chr2:67002146-67003093 | - | 394  |
| OTTHUMG00000152853 | OTTHUMT00000328262 | chr2:67002330-67039556 | + | 383  |
| OTTHUMG00000152857 | OTTHUMT00000328269 | chr2:67121182-67122602 | + | 565  |
| OTTHUMG00000152864 | OTTHUMT00000328290 | chr2:67167082-67376711 | + | 1068 |
| OTTHUMG00000152856 | OTTHUMT00000328266 | chr2:67203993-67295955 | - | 2092 |
| OTTHUMG00000152856 | OTTHUMT00000328268 | chr2:67205306-67258628 | - | 747  |
| OTTHUMG00000152856 | OTTHUMT00000328267 | chr2:67256059-67295913 | - | 566  |
| OTTHUMG00000152863 | OTTHUMT00000328289 | chr2:67294044-67325210 | + | 527  |
| OTTHUMG00000152865 | OTTHUMT00000328291 | chr2:67341439-67370030 | + | 715  |
| OTTHUMG00000152879 | OTTHUMT00000328343 | chr2:67405263-67405940 | + | 572  |
| OTTHUMG00000152486 | OTTHUMT00000326403 | chr2:67642703-67654680 | + | 1002 |
| OTTHUMG00000152562 | OTTHUMT00000326766 | chr2:67646240-67764713 | - | 165  |
| OTTHUMG00000152485 | OTTHUMT00000326402 | chr2:67876690-67906198 | - | 722  |
| OTTHUMG00000152623 | OTTHUMT00000327034 | chr2:68912680-68918344 | + | 434  |
| OTTHUMG00000152624 | OTTHUMT00000327036 | chr2:68913452-68917828 | - | 1015 |
| OTTHUMG00000152623 | OTTHUMT00000327035 | chr2:68915640-68918360 | + | 572  |
| OTTHUMG00000152688 | OTTHUMT00000327365 | chr2:69780828-69794483 | - | 418  |
| OTTHUMG00000153133 | OTTHUMT00000329697 | chr2:70204672-70205953 | - | 660  |
| OTTHUMG00000153164 | OTTHUMT00000329815 | chr2:70483570-70503314 | + | 573  |

|                    |                    |                          |   |      |
|--------------------|--------------------|--------------------------|---|------|
| OTTHUMG00000153230 | OTTHUMT00000330276 | chr2:70968509-70968986   | + | 371  |
| OTTHUMG00000152824 | OTTHUMT00000328143 | chr2:74065767-74066978   | + | 388  |
| OTTHUMG00000152932 | OTTHUMT00000328658 | chr2:74998783-75013429   | + | 562  |
| OTTHUMG00000152930 | OTTHUMT00000328654 | chr2:75000190-75005481   | - | 761  |
| OTTHUMG00000152932 | OTTHUMT00000328656 | chr2:75008874-75013659   | + | 3660 |
| OTTHUMG00000152932 | OTTHUMT00000328657 | chr2:75012063-75019053   | + | 437  |
| OTTHUMG00000152931 | OTTHUMT00000328655 | chr2:75020893-75023305   | + | 1264 |
| OTTHUMG00000152939 | OTTHUMT00000328703 | chr2:75555087-75563213   | + | 334  |
| OTTHUMG00000152842 | OTTHUMT00000328231 | chr2:77633200-77673953   | - | 594  |
| OTTHUMG00000152843 | OTTHUMT00000328232 | chr2:77733047-77735302   | - | 282  |
| OTTHUMG00000152841 | OTTHUMT00000328224 | chr2:77752849-77754426   | + | 795  |
| OTTHUMG00000152845 | OTTHUMT00000328254 | chr2:77996568-77998643   | + | 632  |
| OTTHUMG00000152846 | OTTHUMT00000328255 | chr2:78169364-78208440   | + | 1097 |
| OTTHUMG00000152871 | OTTHUMT00000328311 | chr2:78678545-78680040   | - | 369  |
| OTTHUMG00000152890 | OTTHUMT00000328439 | chr2:80780024-80950826   | - | 764  |
| OTTHUMG00000152947 | OTTHUMT00000328738 | chr2:81543330-81547581   | - | 518  |
| OTTHUMG00000152955 | OTTHUMT00000328765 | chr2:82063907-82086335   | - | 483  |
| OTTHUMG00000152956 | OTTHUMT00000328766 | chr2:82557770-82619346   | - | 683  |
| OTTHUMG00000152969 | OTTHUMT00000328819 | chr2:83603449-83604137   | + | 301  |
| OTTHUMG00000153166 | OTTHUMT00000329846 | chr2:85895764-85906025   | + | 1708 |
| OTTHUMG00000152992 | OTTHUMT00000328926 | chr2:97333063-97335485   | + | 553  |
| OTTHUMG00000152993 | OTTHUMT00000328927 | chr2:97435687-97438109   | - | 553  |
| OTTHUMG00000153173 | OTTHUMT00000329948 | chr2:98744833-98751905   | - | 923  |
| OTTHUMG00000153172 | OTTHUMT00000329947 | chr2:98751856-98754975   | - | 546  |
| OTTHUMG00000153132 | OTTHUMT00000329691 | chr2:100191148-100234378 | + | 3112 |
| OTTHUMG00000153132 | OTTHUMT00000329692 | chr2:100225525-100232156 | + | 578  |
| OTTHUMG00000153149 | OTTHUMT00000329774 | chr2:100589922-100592245 | + | 515  |
| OTTHUMG00000153149 | OTTHUMT00000329775 | chr2:100590138-100592252 | + | 436  |
| OTTHUMG00000153160 | OTTHUMT00000329809 | chr2:100652786-100658932 | - | 560  |
| OTTHUMG00000153159 | OTTHUMT00000329808 | chr2:100705115-100705776 | - | 234  |
| OTTHUMG00000153096 | OTTHUMT00000329513 | chr2:102856230-102878612 | - | 704  |
| OTTHUMG00000153097 | OTTHUMT00000329514 | chr2:102950298-102967319 | - | 433  |
| OTTHUMG00000153094 | OTTHUMT00000329502 | chr2:102970213-102971455 | + | 546  |
| OTTHUMG00000153099 | OTTHUMT00000329516 | chr2:102994669-103002788 | + | 476  |
| OTTHUMG00000153111 | OTTHUMT00000329587 | chr2:103092649-103159150 | - | 634  |
| OTTHUMG00000153045 | OTTHUMT00000329211 | chr2:103839860-103863099 | - | 577  |
| OTTHUMG00000153043 | OTTHUMT00000329209 | chr2:103848636-103852578 | - | 541  |
| OTTHUMG00000153044 | OTTHUMT00000329210 | chr2:104108158-104130119 | - | 524  |
| OTTHUMG00000153047 | OTTHUMT00000329239 | chr2:104394091-104398502 | + | 469  |
| OTTHUMG00000153049 | OTTHUMT00000329241 | chr2:104395117-104396898 | - | 491  |
| OTTHUMG00000153056 | OTTHUMT00000329251 | chr2:104563711-104564780 | - | 435  |
| OTTHUMG00000153055 | OTTHUMT00000329250 | chr2:104566042-104568244 | + | 449  |
| OTTHUMG00000153057 | OTTHUMT00000329252 | chr2:104642227-104647727 | + | 557  |
| OTTHUMG00000153052 | OTTHUMT00000329247 | chr2:104648329-104649746 | + | 532  |
| OTTHUMG00000153054 | OTTHUMT00000329249 | chr2:104686648-104688399 | + | 707  |

|                    |                    |                          |   |      |
|--------------------|--------------------|--------------------------|---|------|
| OTTHUMG00000153066 | OTTHUMT00000329333 | chr2:104729528-104738645 | - | 2109 |
| OTTHUMG00000153066 | OTTHUMT00000329332 | chr2:104729530-104740609 | - | 2430 |
| OTTHUMG00000153066 | OTTHUMT00000329334 | chr2:104732274-104737765 | - | 479  |
| OTTHUMG00000153065 | OTTHUMT00000329330 | chr2:104790462-104834351 | - | 633  |
| OTTHUMG00000153065 | OTTHUMT00000329328 | chr2:104790463-104834343 | - | 671  |
| OTTHUMG00000153065 | OTTHUMT00000329329 | chr2:104790463-104836073 | - | 603  |
| OTTHUMG00000153065 | OTTHUMT00000329327 | chr2:104790467-104834348 | - | 743  |
| OTTHUMG00000153065 | OTTHUMT00000329331 | chr2:104790467-104834366 | - | 718  |
| OTTHUMG00000153079 | OTTHUMT00000329371 | chr2:105127003-105128112 | + | 795  |
| OTTHUMG00000153079 | OTTHUMT00000329372 | chr2:105127013-105127802 | + | 513  |
| OTTHUMG00000153079 | OTTHUMT00000329373 | chr2:105127032-105128314 | + | 412  |
| OTTHUMG00000153152 | OTTHUMT00000329797 | chr2:105941972-105944894 | - | 422  |
| OTTHUMG00000153152 | OTTHUMT00000329798 | chr2:105942075-105943197 | - | 186  |
| OTTHUMG00000153181 | OTTHUMT00000329973 | chr2:106504791-106520967 | - | 551  |
| OTTHUMG00000153180 | OTTHUMT00000329972 | chr2:106525902-106527185 | + | 509  |
| OTTHUMG00000153205 | OTTHUMT00000330102 | chr2:107237579-107348761 | - | 856  |
| OTTHUMG00000153205 | OTTHUMT00000330089 | chr2:107249041-107348431 | - | 485  |
| OTTHUMG00000153144 | OTTHUMT00000329746 | chr2:107345170-107389148 | + | 646  |
| OTTHUMG00000153144 | OTTHUMT00000330059 | chr2:107345207-107390217 | + | 612  |
| OTTHUMG00000153144 | OTTHUMT00000330060 | chr2:107364080-107383574 | + | 317  |
| OTTHUMG00000153200 | OTTHUMT00000330061 | chr2:107368520-107525537 | - | 604  |
| OTTHUMG00000153209 | OTTHUMT00000330097 | chr2:107512375-107539214 | + | 1536 |
| OTTHUMG00000153209 | OTTHUMT00000330347 | chr2:107525637-107538527 | + | 578  |
| OTTHUMG00000153313 | OTTHUMT00000330678 | chr2:107737000-107805017 | + | 535  |
| OTTHUMG00000153313 | OTTHUMT00000330679 | chr2:107737033-107795236 | + | 573  |
| OTTHUMG00000153366 | OTTHUMT00000330878 | chr2:108032088-108035643 | - | 385  |
| OTTHUMG00000153177 | OTTHUMT00000329963 | chr2:108150636-108200729 | - | 606  |
| OTTHUMG00000153216 | OTTHUMT00000330149 | chr2:108305126-108336687 | + | 1871 |
| OTTHUMG00000131194 | OTTHUMT00000253918 | chr2:110326395-110328018 | - | 1030 |
| OTTHUMG00000153641 | OTTHUMT00000331942 | chr2:111084962-111086450 | + | 745  |
| OTTHUMG00000153642 | OTTHUMT00000331943 | chr2:111183623-111190643 | - | 4392 |
| OTTHUMG00000153690 | OTTHUMT00000332141 | chr2:111739331-111753928 | + | 615  |
| OTTHUMG00000153695 | OTTHUMT00000332149 | chr2:111965321-111985038 | + | 755  |
| OTTHUMG00000153698 | OTTHUMT00000332152 | chr2:111965578-111975056 | + | 1952 |
| OTTHUMG00000153694 | OTTHUMT00000332148 | chr2:111965991-111968859 | - | 879  |
| OTTHUMG00000153696 | OTTHUMT00000332150 | chr2:112081889-112086566 | + | 790  |
| OTTHUMG00000153300 | OTTHUMT00000330617 | chr2:113064844-113065987 | + | 527  |
| OTTHUMG00000153341 | OTTHUMT00000330815 | chr2:113898542-113899371 | + | 506  |
| OTTHUMG00000153367 | OTTHUMT00000330895 | chr2:113977652-113978654 | + | 411  |
| OTTHUMG00000047830 | OTTHUMT00000330896 | chr2:113986401-113989358 | + | 1589 |
| OTTHUMG00000047830 | OTTHUMT00000109049 | chr2:113986510-113989532 | + | 742  |
| OTTHUMG00000047820 | OTTHUMT00000109027 | chr2:114051429-114052956 | + | 1090 |
| OTTHUMG00000047820 | OTTHUMT00000109026 | chr2:114051662-114052823 | + | 818  |
| OTTHUMG00000153498 | OTTHUMT00000331368 | chr2:114303437-114305166 | - | 414  |
| OTTHUMG00000153496 | OTTHUMT00000331365 | chr2:114305096-114305774 | - | 576  |



|                    |                    |                          |   |      |
|--------------------|--------------------|--------------------------|---|------|
| OTTHUMG00000153496 | OTTHUMT00000331364 | chr2:114305235-114317403 | - | 387  |
| OTTHUMG00000153529 | OTTHUMT00000331497 | chr2:114453616-114481349 | + | 842  |
| OTTHUMG00000153531 | OTTHUMT00000331503 | chr2:114453956-114457305 | + | 813  |
| OTTHUMG00000153530 | OTTHUMT00000331498 | chr2:114596321-114597340 | - | 463  |
| OTTHUMG00000141319 | OTTHUMT00000280683 | chr2:118231609-118278220 | - | 588  |
| OTTHUMG00000058513 | OTTHUMT00000129613 | chr2:118307983-118315704 | + | 3088 |
| OTTHUMG00000153418 | OTTHUMT00000331097 | chr2:118606174-118660432 | - | 774  |
| OTTHUMG00000153418 | OTTHUMT00000331098 | chr2:118656985-118660419 | - | 577  |
| OTTHUMG00000153418 | OTTHUMT00000331099 | chr2:118657067-118660432 | - | 456  |
| OTTHUMG00000153330 | OTTHUMT00000330753 | chr2:121652373-121656626 | + | 542  |
| OTTHUMG00000153333 | OTTHUMT00000330765 | chr2:122264490-122270748 | + | 790  |
| OTTHUMG00000153333 | OTTHUMT00000330763 | chr2:122264506-122269086 | + | 647  |
| OTTHUMG00000153333 | OTTHUMT00000330764 | chr2:122264511-122270402 | + | 761  |
| OTTHUMG00000153333 | OTTHUMT00000330766 | chr2:122264538-122268965 | + | 346  |
| OTTHUMG00000153425 | OTTHUMT00000331145 | chr2:123539367-123541768 | + | 799  |
| OTTHUMG00000153424 | OTTHUMT00000331144 | chr2:123540197-123547527 | - | 581  |
| OTTHUMG00000153426 | OTTHUMT00000331148 | chr2:123917312-123918491 | - | 267  |
| OTTHUMG00000153369 | OTTHUMT00000330898 | chr2:126185016-126239889 | + | 666  |
| OTTHUMG00000153386 | OTTHUMT00000330992 | chr2:126584146-126592032 | + | 620  |
| OTTHUMG00000153398 | OTTHUMT00000331044 | chr2:127863176-127874626 | + | 2688 |
| OTTHUMG00000153416 | OTTHUMT00000331084 | chr2:129054535-129055620 | - | 355  |
| OTTHUMG00000153414 | OTTHUMT00000331082 | chr2:129537889-129545768 | - | 658  |
| OTTHUMG00000153413 | OTTHUMT00000331081 | chr2:129716216-129747891 | - | 2208 |
| OTTHUMG00000153602 | OTTHUMT00000331804 | chr2:131876944-131883092 | + | 1857 |
| OTTHUMG00000153621 | OTTHUMT00000331858 | chr2:132111068-132123658 | + | 3514 |
| OTTHUMG00000153621 | OTTHUMT00000331859 | chr2:132112785-132118467 | + | 709  |
| OTTHUMG00000153714 | OTTHUMT00000332207 | chr2:132303844-132306074 | - | 559  |
| OTTHUMG00000153603 | OTTHUMT00000331805 | chr2:132759838-132768420 | - | 319  |
| OTTHUMG00000153580 | OTTHUMT00000331712 | chr2:136551932-136552553 | + | 467  |
| OTTHUMG00000153618 | OTTHUMT00000331841 | chr2:138352794-138400447 | - | 1267 |
| OTTHUMG00000153616 | OTTHUMT00000331839 | chr2:138575924-138579945 | + | 550  |
| OTTHUMG00000153617 | OTTHUMT00000331840 | chr2:138944696-138947972 | + | 823  |
| OTTHUMG00000153631 | OTTHUMT00000331892 | chr2:139078550-139087207 | + | 678  |
| OTTHUMG00000153648 | OTTHUMT00000331960 | chr2:139840205-139853187 | + | 553  |
| OTTHUMG00000153649 | OTTHUMT00000331961 | chr2:139943815-139951787 | + | 464  |
| OTTHUMG00000153650 | OTTHUMT00000331967 | chr2:140298935-140299916 | - | 296  |
| OTTHUMG00000153651 | OTTHUMT00000331968 | chr2:140577622-140605819 | - | 440  |
| OTTHUMG00000153725 | OTTHUMT00000332234 | chr2:144273506-144293638 | + | 461  |
| OTTHUMG00000153703 | OTTHUMT00000332166 | chr2:145162450-145164222 | - | 797  |
| OTTHUMG00000153704 | OTTHUMT00000332167 | chr2:145768315-145805885 | - | 343  |
| OTTHUMG00000153709 | OTTHUMT00000332188 | chr2:146043332-146062062 | - | 829  |
| OTTHUMG00000153710 | OTTHUMT00000332189 | chr2:146074945-146077461 | - | 404  |
| OTTHUMG00000153722 | OTTHUMT00000332224 | chr2:146389128-146405184 | + | 743  |
| OTTHUMG00000153712 | OTTHUMT00000332203 | chr2:147353947-147375970 | + | 525  |
| OTTHUMG00000151885 | OTTHUMT00000324253 | chr2:161809496-161813807 | + | 2331 |

|                    |                    |                          |   |      |
|--------------------|--------------------|--------------------------|---|------|
| OTTHUMG00000151885 | OTTHUMT00000324254 | chr2:161809512-161812211 | + | 762  |
| OTTHUMG00000150131 | OTTHUMT00000316474 | chr2:220259953-220287652 | + | 494  |
| OTTHUMG00000059376 | OTTHUMT00000131979 | chr2:220303076-220310708 | + | 359  |
| OTTHUMG00000059377 | OTTHUMT00000131980 | chr2:220477016-220477854 | - | 610  |
| OTTHUMG00000153378 | OTTHUMT00000330941 | chr2:224071735-224077573 | + | 805  |
| OTTHUMG00000153377 | OTTHUMT00000330940 | chr2:224078438-224083895 | + | 785  |
| OTTHUMG00000153471 | OTTHUMT00000331297 | chr2:226753004-226758331 | - | 1132 |
| OTTHUMG00000153589 | OTTHUMT00000331758 | chr2:229056221-229184355 | - | 674  |
| OTTHUMG00000153588 | OTTHUMT00000331757 | chr2:229256497-229257540 | - | 425  |
| OTTHUMG00000133221 | OTTHUMT00000256956 | chr2:231569085-231598014 | + | 1609 |
| OTTHUMG00000059127 | OTTHUMT00000131003 | chr2:234438881-234440744 | - | 1863 |
| OTTHUMG00000059209 | OTTHUMT00000131317 | chr2:234682099-234682864 | + | 595  |
| OTTHUMG00000153145 | OTTHUMT00000329757 | chr2:235658205-235661969 | - | 688  |
| OTTHUMG00000153146 | OTTHUMT00000329758 | chr2:235751279-235752288 | + | 661  |
| OTTHUMG00000153025 | OTTHUMT00000329067 | chr2:237306764-237326188 | + | 558  |
| OTTHUMG00000153025 | OTTHUMT00000329068 | chr2:237326156-237327745 | + | 878  |
| OTTHUMG00000153026 | OTTHUMT00000329069 | chr2:237621981-237629549 | - | 2224 |
| OTTHUMG00000153018 | OTTHUMT00000329029 | chr2:237696292-237697479 | - | 667  |
| OTTHUMG00000152959 | OTTHUMT00000328769 | chr2:238186359-238199907 | + | 2055 |
| OTTHUMG00000152883 | OTTHUMT00000328354 | chr2:238872090-238874000 | - | 560  |
| OTTHUMG00000152849 | OTTHUMT00000328258 | chr2:239084070-239128434 | - | 1972 |
| OTTHUMG00000152844 | OTTHUMT00000328239 | chr2:239362039-239363107 | - | 590  |
| OTTHUMG00000152836 | OTTHUMT00000328213 | chr2:239496916-239497169 | + | 253  |
| OTTHUMG00000152416 | OTTHUMT00000326162 | chr2:240212329-240217470 | + | 346  |
| OTTHUMG00000152377 | OTTHUMT00000326022 | chr2:240815650-240844125 | - | 426  |
| OTTHUMG00000151554 | OTTHUMT00000323096 | chr2:242107060-242108335 | + | 820  |
| OTTHUMG00000151513 | OTTHUMT00000322958 | chr2:242278502-242282377 | + | 413  |
| OTTHUMG00000151392 | OTTHUMT00000322463 | chr2:242435205-242435861 | + | 569  |
| OTTHUMG00000151385 | OTTHUMT00000322442 | chr2:242638519-242674962 | - | 557  |
| OTTHUMG00000031663 | OTTHUMT00000077517 | chr20:1290266-1291229    | + | 478  |
| OTTHUMG00000153691 | OTTHUMT00000332142 | chr20:1702011-1708392    | - | 743  |
| OTTHUMG00000031681 | OTTHUMT00000077567 | chr20:1732662-1746252    | - | 342  |
| OTTHUMG00000031689 | OTTHUMT00000077577 | chr20:2135863-2141797    | + | 413  |
| OTTHUMG00000031689 | OTTHUMT00000077578 | chr20:2135873-2141797    | + | 534  |
| OTTHUMG00000031776 | OTTHUMT00000077801 | chr20:4121714-4124375    | + | 477  |
| OTTHUMG00000031781 | OTTHUMT00000077814 | chr20:4359808-4360320    | - | 406  |
| OTTHUMG00000031780 | OTTHUMT00000077813 | chr20:4404285-4453846    | + | 166  |
| OTTHUMG00000031805 | OTTHUMT00000077866 | chr20:5360638-5361249    | - | 440  |
| OTTHUMG00000031805 | OTTHUMT00000077868 | chr20:5360638-5374332    | - | 1537 |
| OTTHUMG00000031805 | OTTHUMT00000077867 | chr20:5362519-5374392    | - | 672  |
| OTTHUMG00000031810 | OTTHUMT00000077878 | chr20:5428969-5433259    | - | 1855 |
| OTTHUMG00000031810 | OTTHUMT00000077879 | chr20:5430168-5431436    | - | 468  |
| OTTHUMG00000031808 | OTTHUMT00000077876 | chr20:5436521-5438648    | - | 355  |
| OTTHUMG00000031831 | OTTHUMT00000077916 | chr20:6375370-6457106    | + | 1481 |
| OTTHUMG00000031832 | OTTHUMT00000077917 | chr20:6659905-6664783    | - | 929  |

|                     |                     |                         |   |      |
|---------------------|---------------------|-------------------------|---|------|
| OTTHUMG00000031835  | OTTHUMT00000077920  | chr20:6998261-7075303   | + | 379  |
| OTTHUMG00000031836  | OTTHUMT00000077921  | chr20:7075114-7182849   | - | 866  |
| OTTHUMG00000031837  | OTTHUMT00000077922  | chr20:7185227-7186861   | - | 386  |
| OTTHUMG00000031838  | OTTHUMT00000077923  | chr20:7276114-7296279   | + | 745  |
| OTTHUMG00000031862  | OTTHUMT00000077973  | chr20:10102168-10125638 | + | 347  |
| OTTHUMG00000031861  | OTTHUMT00000077972  | chr20:10108883-10114423 | + | 443  |
| OTTHUMG00000031876  | OTTHUMT00000078007  | chr20:10681738-10682614 | + | 436  |
| OTTHUMG00000031877  | OTTHUMT00000078008  | chr20:10681926-10693934 | - | 726  |
| OTTHUMG00000031879  | OTTHUMT00000078010  | chr20:10793303-10795830 | + | 265  |
| OTTHUMG00000031883  | OTTHUMT00000078015  | chr20:11162818-11230173 | - | 1097 |
| OTTHUMG00000031883  | OTTHUMT00000078014  | chr20:11194764-11197483 | - | 412  |
| OTTHUMG00000031891  | OTTHUMT00000078024  | chr20:12172543-12172944 | - | 278  |
| OTTHUMG00000031892  | OTTHUMT00000078025  | chr20:12234261-12245133 | - | 471  |
| OTTHUMG00000031897  | OTTHUMT00000078030  | chr20:12793850-12881167 | - | 3021 |
| OTTHUMG00000031894  | OTTHUMT00000078027  | chr20:12864687-12865842 | + | 482  |
| OTTHUMG00000031895  | OTTHUMT00000078028  | chr20:12878986-12880275 | + | 599  |
| OTTHUMG00000031936  | OTTHUMT00000078115  | chr20:16786607-16792793 | - | 830  |
| OTTHUMG00000031951  | OTTHUMT00000078135  | chr20:17816007-17816804 | - | 630  |
| OTTHUMG00000031958  | OTTHUMT00000078146  | chr20:17988137-17999652 | + | 398  |
| OTTHUMG00000057435  | OTTHUMT000000127626 | chr20:18251196-18287944 | - | 2485 |
| OTTHUMG00000057435  | OTTHUMT000000127627 | chr20:18252299-18287903 | - | 450  |
| OTTHUMG00000031986  | OTTHUMT00000078198  | chr20:18716295-18722637 | - | 1710 |
| OTTHUMG00000031986  | OTTHUMT00000078197  | chr20:18717191-18722979 | - | 730  |
| OTTHUMG00000031986  | OTTHUMT00000078196  | chr20:18717308-18722933 | - | 958  |
| OTTHUMG00000031992  | OTTHUMT00000078204  | chr20:19686352-19728320 | + | 285  |
| OTTHUMG00000031992  | OTTHUMT00000078205  | chr20:19686792-19737926 | + | 412  |
| OTTHUMG00000031992  | OTTHUMT00000078206  | chr20:19728217-19738319 | + | 675  |
| OTTHUMG00000032011  | OTTHUMT00000078248  | chr20:20650317-20651034 | - | 388  |
| OTTHUMG00000032013  | OTTHUMT00000078250  | chr20:20899089-20901203 | + | 510  |
| OTTHUMG00000032017  | OTTHUMT00000078256  | chr20:21022190-21030200 | - | 478  |
| OTTHUMG00000032017  | OTTHUMT00000078255  | chr20:21022199-21034975 | - | 357  |
| OTTHUMG00000032023  | OTTHUMT00000078271  | chr20:21327531-21329015 | + | 506  |
| OTTHUMG00000032029  | OTTHUMT00000078277  | chr20:21458840-21459382 | + | 447  |
| OTTHUMG00000032035  | OTTHUMT00000078283  | chr20:21876285-21899421 | + | 567  |
| OTTHUMG00000032036  | OTTHUMT00000078284  | chr20:21982831-22003238 | + | 516  |
| OTTHUMG00000032037  | OTTHUMT00000078285  | chr20:22149192-22151921 | + | 436  |
| OTTHUMG00000032039  | OTTHUMT00000078287  | chr20:22208866-22211310 | - | 501  |
| OTTHUMG00000032040  | OTTHUMT00000078288  | chr20:22328989-22349281 | - | 1662 |
| OTTHUMG00000032044  | OTTHUMT00000078294  | chr20:22516160-22536155 | - | 656  |
| OTTHUMG00000032047  | OTTHUMT00000078299  | chr20:22604710-22613516 | - | 2318 |
| OTTHUMG00000032047  | OTTHUMT00000078300  | chr20:22612300-22613982 | - | 562  |
| OTTHUMG00000032052  | OTTHUMT00000078306  | chr20:22938846-22959422 | - | 715  |
| OTTHUMG000000133099 | OTTHUMT000000256764 | chr20:23053705-23061258 | - | 1892 |
| OTTHUMG00000032057  | OTTHUMT00000078311  | chr20:23116765-23118944 | + | 554  |
| OTTHUMG00000032063  | OTTHUMT00000078322  | chr20:23285231-23286492 | - | 451  |

|                     |                     |                         |   |      |
|---------------------|---------------------|-------------------------|---|------|
| OTTHUMG00000032063  | OTTHUMT00000078321  | chr20:23285231-23286642 | - | 511  |
| OTTHUMG00000032063  | OTTHUMT00000078323  | chr20:23285432-23286753 | - | 503  |
| OTTHUMG00000032077  | OTTHUMT00000078342  | chr20:23583862-23585027 | - | 434  |
| OTTHUMG000000133141 | OTTHUMT000000256830 | chr20:23726778-23734300 | + | 793  |
| OTTHUMG00000032097  | OTTHUMT00000078369  | chr20:24071226-24073022 | - | 532  |
| OTTHUMG00000032098  | OTTHUMT00000078370  | chr20:24128403-24153224 | + | 2372 |
| OTTHUMG00000032099  | OTTHUMT00000078371  | chr20:24226221-24246722 | - | 498  |
| OTTHUMG00000032103  | OTTHUMT00000078375  | chr20:24608183-24609627 | + | 803  |
| OTTHUMG00000032113  | OTTHUMT00000078391  | chr20:25069425-25077426 | - | 3164 |
| OTTHUMG00000032113  | OTTHUMT00000078389  | chr20:25071876-25077894 | - | 465  |
| OTTHUMG00000032113  | OTTHUMT00000078390  | chr20:25072001-25076100 | - | 289  |
| OTTHUMG00000032113  | OTTHUMT00000078392  | chr20:25072001-25077876 | - | 340  |
| OTTHUMG00000032135  | OTTHUMT00000078460  | chr20:25679854-25681397 | + | 318  |
| OTTHUMG00000032138  | OTTHUMT00000078467  | chr20:25792905-25796315 | + | 1691 |
| OTTHUMG000000150168 | OTTHUMT000000316666 | chr20:25884448-25897924 | + | 4600 |
| OTTHUMG00000032140  | OTTHUMT00000078469  | chr20:25930172-25930935 | - | 441  |
| OTTHUMG00000032141  | OTTHUMT00000078470  | chr20:25937427-25939167 | - | 540  |
| OTTHUMG00000032148  | OTTHUMT00000078482  | chr20:26061523-26062834 | - | 269  |
| OTTHUMG00000032149  | OTTHUMT00000078483  | chr20:26115655-26137527 | - | 1124 |
| OTTHUMG00000032149  | OTTHUMT00000078484  | chr20:26115655-26137869 | - | 1208 |
| OTTHUMG00000032150  | OTTHUMT00000078485  | chr20:26119625-26122582 | + | 624  |
| OTTHUMG000000133197 | OTTHUMT000000256907 | chr20:28127243-28134874 | - | 3326 |
| OTTHUMG00000032152  | OTTHUMT00000078487  | chr20:28135298-28136648 | - | 551  |
| OTTHUMG00000032154  | OTTHUMT00000078491  | chr20:28172149-28184024 | - | 715  |
| OTTHUMG00000032154  | OTTHUMT00000078489  | chr20:28179417-28210067 | - | 456  |
| OTTHUMG00000032169  | OTTHUMT00000078509  | chr20:29472900-29480644 | - | 496  |
| OTTHUMG000000133269 | OTTHUMT000000257046 | chr20:30684322-30703341 | - | 3451 |
| OTTHUMG00000032251  | OTTHUMT00000078679  | chr20:31245072-31261929 | + | 1194 |
| OTTHUMG00000032251  | OTTHUMT000000257118 | chr20:31249676-31256636 | + | 565  |
| OTTHUMG000000150044 | OTTHUMT000000315979 | chr20:33564810-33568774 | + | 3964 |
| OTTHUMG00000032376  | OTTHUMT00000078969  | chr20:34137588-34139528 | - | 614  |
| OTTHUMG00000032422  | OTTHUMT000000276659 | chr20:35554288-35571047 | - | 711  |
| OTTHUMG00000032422  | OTTHUMT00000079119  | chr20:35554350-35557578 | - | 592  |
| OTTHUMG00000046198  | OTTHUMT000000276668 | chr20:35681114-35684935 | - | 540  |
| OTTHUMG00000032445  | OTTHUMT00000079172  | chr20:36468072-36478858 | - | 2002 |
| OTTHUMG00000032466  | OTTHUMT00000079223  | chr20:37275834-37286805 | - | 1514 |
| OTTHUMG00000032468  | OTTHUMT00000079225  | chr20:37847777-37875285 | + | 478  |
| OTTHUMG00000032469  | OTTHUMT00000079226  | chr20:38066533-38070301 | + | 535  |
| OTTHUMG00000032469  | OTTHUMT00000079227  | chr20:38066540-38070585 | + | 728  |
| OTTHUMG00000032470  | OTTHUMT00000079228  | chr20:38093641-38105945 | + | 637  |
| OTTHUMG00000032472  | OTTHUMT00000079230  | chr20:38183096-38188412 | + | 423  |
| OTTHUMG00000032473  | OTTHUMT00000079231  | chr20:38759949-38760670 | - | 271  |
| OTTHUMG00000032491  | OTTHUMT00000079281  | chr20:40076088-40077532 | - | 414  |
| OTTHUMG00000032514  | OTTHUMT00000079326  | chr20:41851998-41888416 | + | 2418 |
| OTTHUMG00000032515  | OTTHUMT00000079327  | chr20:41956774-41957522 | + | 522  |

|                    |                     |                         |   |      |
|--------------------|---------------------|-------------------------|---|------|
| OTTHUMG00000032534 | OTTHUMT00000079368  | chr20:42510831-42512146 | - | 409  |
| OTTHUMG00000032542 | OTTHUMT00000079376  | chr20:42718506-42725553 | - | 997  |
| OTTHUMG00000032542 | OTTHUMT000000127822 | chr20:42718506-42758151 | - | 1410 |
| OTTHUMG00000032569 | OTTHUMT00000079420  | chr20:43292923-43295386 | + | 553  |
| OTTHUMG00000032593 | OTTHUMT00000079474  | chr20:43509456-43510396 | + | 512  |
| OTTHUMG00000032629 | OTTHUMT00000079542  | chr20:44082665-44083773 | - | 489  |
| OTTHUMG00000032631 | OTTHUMT00000079544  | chr20:44083822-44089845 | + | 246  |
| OTTHUMG00000032631 | OTTHUMT00000079545  | chr20:44083896-44085635 | + | 397  |
| OTTHUMG00000032644 | OTTHUMT00000079565  | chr20:44230450-44233283 | - | 2135 |
| OTTHUMG00000032669 | OTTHUMT00000079600  | chr20:45454080-45474478 | - | 746  |
| OTTHUMG00000032676 | OTTHUMT00000079611  | chr20:46012950-46014206 | + | 423  |
| OTTHUMG00000032677 | OTTHUMT00000079612  | chr20:46020173-46020754 | + | 454  |
| OTTHUMG00000032678 | OTTHUMT00000079613  | chr20:46042639-46050895 | - | 427  |
| OTTHUMG00000032679 | OTTHUMT00000079614  | chr20:46045555-46046464 | + | 448  |
| OTTHUMG00000032682 | OTTHUMT00000079619  | chr20:46417364-46428914 | + | 505  |
| OTTHUMG00000032681 | OTTHUMT00000079616  | chr20:46420836-46421847 | - | 549  |
| OTTHUMG00000032682 | OTTHUMT00000079620  | chr20:46422100-46432779 | + | 3539 |
| OTTHUMG00000032682 | OTTHUMT00000079617  | chr20:46422162-46423054 | + | 436  |
| OTTHUMG00000032682 | OTTHUMT00000079618  | chr20:46427797-46432779 | + | 3068 |
| OTTHUMG00000032680 | OTTHUMT00000079615  | chr20:46445473-46447045 | - | 402  |
| OTTHUMG00000032683 | OTTHUMT00000079621  | chr20:46533630-46563854 | + | 275  |
| OTTHUMG00000032711 | OTTHUMT00000079667  | chr20:48090660-48091448 | - | 460  |
| OTTHUMG00000032717 | OTTHUMT00000079675  | chr20:48213408-48216046 | + | 731  |
| OTTHUMG00000032716 | OTTHUMT00000079673  | chr20:48216306-48219439 | + | 423  |
| OTTHUMG00000032716 | OTTHUMT00000079674  | chr20:48219290-48221686 | + | 339  |
| OTTHUMG00000032718 | OTTHUMT00000079677  | chr20:48222494-48223314 | + | 500  |
| OTTHUMG00000032718 | OTTHUMT00000079676  | chr20:48222534-48226503 | + | 570  |
| OTTHUMG00000032721 | OTTHUMT00000079681  | chr20:48317430-48329739 | + | 2006 |
| OTTHUMG00000032721 | OTTHUMT00000079682  | chr20:48317443-48328371 | + | 536  |
| OTTHUMG00000032721 | OTTHUMT00000079683  | chr20:48326261-48328981 | + | 1055 |
| OTTHUMG00000032721 | OTTHUMT00000079684  | chr20:48327478-48328359 | + | 684  |
| OTTHUMG00000032727 | OTTHUMT00000079692  | chr20:48695415-48710235 | + | 635  |
| OTTHUMG00000032727 | OTTHUMT00000258384  | chr20:48703146-48712219 | + | 535  |
| OTTHUMG00000134283 | OTTHUMT00000258921  | chr20:49881743-49912858 | - | 2323 |
| OTTHUMG00000032757 | OTTHUMT00000079750  | chr20:50501410-50505565 | - | 428  |
| OTTHUMG00000134296 | OTTHUMT00000259124  | chr20:50537868-50550537 | - | 571  |
| OTTHUMG00000032760 | OTTHUMT00000259163  | chr20:50721863-50740554 | + | 481  |
| OTTHUMG00000032760 | OTTHUMT00000079752  | chr20:50724357-50731524 | + | 461  |
| OTTHUMG00000032760 | OTTHUMT00000259161  | chr20:50731374-50740526 | + | 534  |
| OTTHUMG00000032760 | OTTHUMT00000259162  | chr20:50731374-50740526 | + | 318  |
| OTTHUMG00000032760 | OTTHUMT00000259164  | chr20:50731374-50740526 | + | 180  |
| OTTHUMG00000032760 | OTTHUMT00000079753  | chr20:50735068-50740875 | + | 371  |
| OTTHUMG00000033074 | OTTHUMT00000080493  | chr20:50908284-50912801 | - | 457  |
| OTTHUMG00000032767 | OTTHUMT00000079761  | chr20:51658300-51684536 | + | 378  |
| OTTHUMG00000032768 | OTTHUMT00000079762  | chr20:51849769-51851264 | - | 343  |

|                    |                    |                         |   |      |
|--------------------|--------------------|-------------------------|---|------|
| OTTHUMG00000134311 | OTTHUMT00000259284 | chr20:53470281-53477142 | - | 2287 |
| OTTHUMG00000032780 | OTTHUMT00000259285 | chr20:53472988-53518159 | + | 1332 |
| OTTHUMG00000032780 | OTTHUMT00000079781 | chr20:53473010-53476735 | + | 610  |
| OTTHUMG00000032784 | OTTHUMT00000079785 | chr20:54304430-54307623 | - | 451  |
| OTTHUMG00000032803 | OTTHUMT00000259432 | chr20:54586026-54604589 | + | 692  |
| OTTHUMG00000032803 | OTTHUMT00000079821 | chr20:54604773-54607084 | + | 296  |
| OTTHUMG00000032807 | OTTHUMT00000079825 | chr20:54738860-54739923 | - | 481  |
| OTTHUMG00000032809 | OTTHUMT00000079827 | chr20:55114204-55115591 | + | 374  |
| OTTHUMG00000032808 | OTTHUMT00000079826 | chr20:55123378-55130555 | + | 767  |
| OTTHUMG00000032826 | OTTHUMT00000079852 | chr20:55608157-55609662 | - | 821  |
| OTTHUMG00000137362 | OTTHUMT00000267816 | chr20:55965588-55968122 | - | 1852 |
| OTTHUMG00000032833 | OTTHUMT00000079862 | chr20:56077516-56080522 | - | 1010 |
| OTTHUMG00000032833 | OTTHUMT00000079863 | chr20:56077516-56080532 | - | 742  |
| OTTHUMG00000137387 | OTTHUMT00000268118 | chr20:57360645-57366224 | - | 591  |
| OTTHUMG00000137385 | OTTHUMT00000268116 | chr20:57369377-57373223 | - | 618  |
| OTTHUMG00000137386 | OTTHUMT00000268117 | chr20:57523641-57524489 | + | 564  |
| OTTHUMG00000032882 | OTTHUMT00000079946 | chr20:58482854-58489127 | + | 427  |
| OTTHUMG00000032885 | OTTHUMT00000079959 | chr20:59085675-59086267 | - | 498  |
| OTTHUMG00000032884 | OTTHUMT00000079958 | chr20:59087591-59088630 | + | 389  |
| OTTHUMG00000032918 | OTTHUMT00000080037 | chr20:60437999-60439963 | + | 475  |
| OTTHUMG00000032921 | OTTHUMT00000080041 | chr20:60735478-60737301 | - | 495  |
| OTTHUMG00000032922 | OTTHUMT00000080042 | chr20:60735569-60737659 | + | 459  |
| OTTHUMG00000032931 | OTTHUMT00000080060 | chr20:60875925-60877209 | - | 538  |
| OTTHUMG00000032954 | OTTHUMT00000080109 | chr20:61139808-61155660 | + | 1228 |
| OTTHUMG00000140135 | OTTHUMT00000276286 | chr20:61197595-61204076 | - | 549  |
| OTTHUMG00000140136 | OTTHUMT00000276287 | chr20:61204002-61206183 | + | 1880 |
| OTTHUMG00000140137 | OTTHUMT00000276288 | chr20:61268594-61282700 | - | 540  |
| OTTHUMG00000032968 | OTTHUMT00000080138 | chr20:61604084-61606908 | + | 374  |
| OTTHUMG00000032990 | OTTHUMT00000080171 | chr20:61909873-61918318 | + | 530  |
| OTTHUMG00000074167 | OTTHUMT00000157562 | chr21:13293868-13310884 | - | 321  |
| OTTHUMG00000074200 | OTTHUMT00000157663 | chr21:14064124-14065932 | + | 456  |
| OTTHUMG00000074314 | OTTHUMT00000157907 | chr21:15041937-15047653 | - | 813  |
| OTTHUMG00000074314 | OTTHUMT00000157906 | chr21:15041937-15048057 | - | 740  |
| OTTHUMG00000074319 | OTTHUMT00000157919 | chr21:15055902-15057282 | + | 693  |
| OTTHUMG00000074318 | OTTHUMT00000157918 | chr21:15212726-15241288 | + | 779  |
| OTTHUMG00000074330 | OTTHUMT00000157934 | chr21:15265662-15287046 | + | 821  |
| OTTHUMG00000074332 | OTTHUMT00000157936 | chr21:15361262-15362029 | + | 444  |
| OTTHUMG00000074333 | OTTHUMT00000157937 | chr21:15664712-15696495 | - | 993  |
| OTTHUMG00000078773 | OTTHUMT00000171763 | chr21:15788122-15790314 | - | 1374 |
| OTTHUMG00000074396 | OTTHUMT00000158059 | chr21:16925017-16934823 | + | 548  |
| OTTHUMG00000074396 | OTTHUMT00000158060 | chr21:16925631-16934873 | + | 501  |
| OTTHUMG00000074394 | OTTHUMT00000158057 | chr21:17048709-17109878 | - | 434  |
| OTTHUMG00000074395 | OTTHUMT00000158058 | chr21:17157066-17167882 | - | 373  |
| OTTHUMG00000074507 | OTTHUMT00000158208 | chr21:17953465-17954573 | - | 514  |
| OTTHUMG00000074500 | OTTHUMT00000158194 | chr21:18129204-18179796 | - | 1114 |

|                    |                    |                         |   |      |
|--------------------|--------------------|-------------------------|---|------|
| OTTHUMG00000074544 | OTTHUMT00000158276 | chr21:18855454-19054192 | - | 849  |
| OTTHUMG00000074544 | OTTHUMT00000158277 | chr21:18855804-19053993 | - | 668  |
| OTTHUMG00000074544 | OTTHUMT00000158278 | chr21:18906251-19047217 | - | 612  |
| OTTHUMG00000074543 | OTTHUMT00000158275 | chr21:18908620-18944549 | + | 876  |
| OTTHUMG00000074549 | OTTHUMT00000158283 | chr21:19212123-19230048 | - | 782  |
| OTTHUMG00000074546 | OTTHUMT00000158280 | chr21:19247453-19261247 | - | 422  |
| OTTHUMG00000074542 | OTTHUMT00000158274 | chr21:19340500-19341874 | + | 788  |
| OTTHUMG00000074550 | OTTHUMT00000158284 | chr21:19424712-19428612 | + | 467  |
| OTTHUMG00000074551 | OTTHUMT00000158285 | chr21:19595801-19597927 | + | 634  |
| OTTHUMG00000074607 | OTTHUMT00000158341 | chr21:20187464-20193940 | - | 409  |
| OTTHUMG00000074606 | OTTHUMT00000158340 | chr21:20550936-20553004 | - | 862  |
| OTTHUMG00000078063 | OTTHUMT00000170848 | chr21:21036779-21097252 | - | 1843 |
| OTTHUMG00000078063 | OTTHUMT00000170849 | chr21:21036784-21097287 | - | 1996 |
| OTTHUMG00000078063 | OTTHUMT00000170851 | chr21:21037110-21097259 | - | 1753 |
| OTTHUMG00000078063 | OTTHUMT00000170850 | chr21:21037110-21097297 | - | 1618 |
| OTTHUMG00000078063 | OTTHUMT00000170852 | chr21:21037928-21097275 | - | 822  |
| OTTHUMG00000078122 | OTTHUMT00000170919 | chr21:21860955-21909629 | + | 607  |
| OTTHUMG00000078124 | OTTHUMT00000170921 | chr21:21949230-21980520 | - | 475  |
| OTTHUMG00000078123 | OTTHUMT00000170920 | chr21:22017484-22031510 | - | 609  |
| OTTHUMG00000078125 | OTTHUMT00000170923 | chr21:22041164-22091606 | + | 478  |
| OTTHUMG00000078125 | OTTHUMT00000170922 | chr21:22041176-22091606 | + | 755  |
| OTTHUMG00000078257 | OTTHUMT00000171059 | chr21:22227506-22269871 | - | 527  |
| OTTHUMG00000078243 | OTTHUMT00000171045 | chr21:22303134-22312346 | - | 792  |
| OTTHUMG00000078243 | OTTHUMT00000171043 | chr21:22303348-22392649 | - | 891  |
| OTTHUMG00000078243 | OTTHUMT00000171044 | chr21:22335364-22348559 | - | 462  |
| OTTHUMG00000078244 | OTTHUMT00000171046 | chr21:22392807-22410718 | + | 720  |
| OTTHUMG00000078249 | OTTHUMT00000171051 | chr21:22504129-22715010 | + | 432  |
| OTTHUMG00000078247 | OTTHUMT00000171049 | chr21:22794795-22814248 | - | 974  |
| OTTHUMG00000078246 | OTTHUMT00000171048 | chr21:23655297-23679053 | - | 1720 |
| OTTHUMG00000078245 | OTTHUMT00000171047 | chr21:23771831-23784914 | + | 859  |
| OTTHUMG00000078274 | OTTHUMT00000171079 | chr21:24182985-24184728 | - | 677  |
| OTTHUMG00000078275 | OTTHUMT00000171080 | chr21:24255091-24261459 | - | 776  |
| OTTHUMG00000078273 | OTTHUMT00000171078 | chr21:24337443-24337812 | + | 215  |
| OTTHUMG00000078273 | OTTHUMT00000171077 | chr21:24337443-24344472 | + | 845  |
| OTTHUMG00000078333 | OTTHUMT00000171147 | chr21:24449355-24482526 | - | 690  |
| OTTHUMG00000078332 | OTTHUMT00000171146 | chr21:24598734-24615561 | - | 2003 |
| OTTHUMG00000078326 | OTTHUMT00000171137 | chr21:24722925-24784492 | + | 2903 |
| OTTHUMG00000078326 | OTTHUMT00000171139 | chr21:24722943-24735509 | + | 491  |
| OTTHUMG00000078326 | OTTHUMT00000171138 | chr21:24722966-24842127 | + | 2173 |
| OTTHUMG00000078331 | OTTHUMT00000171145 | chr21:25134735-25351930 | + | 2715 |
| OTTHUMG00000078329 | OTTHUMT00000171142 | chr21:25180861-25196941 | - | 538  |
| OTTHUMG00000078324 | OTTHUMT00000171135 | chr21:25232616-25238165 | - | 250  |
| OTTHUMG00000078324 | OTTHUMT00000171134 | chr21:25232616-25246342 | - | 439  |
| OTTHUMG00000078324 | OTTHUMT00000171133 | chr21:25232616-25287000 | - | 307  |
| OTTHUMG00000078328 | OTTHUMT00000171141 | chr21:25349719-25364090 | + | 475  |

|                    |                    |                         |   |      |
|--------------------|--------------------|-------------------------|---|------|
| OTTHUMG00000078330 | OTTHUMT00000171143 | chr21:25389206-25397854 | + | 574  |
| OTTHUMG00000078330 | OTTHUMT00000171144 | chr21:25389226-25397854 | + | 681  |
| OTTHUMG00000078327 | OTTHUMT00000171140 | chr21:25421653-25429432 | + | 287  |
| OTTHUMG00000078368 | OTTHUMT00000171188 | chr21:25680004-25725884 | - | 1376 |
| OTTHUMG00000078368 | OTTHUMT00000171189 | chr21:25680004-25725884 | - | 1471 |
| OTTHUMG00000078368 | OTTHUMT00000171191 | chr21:25690377-25718892 | - | 737  |
| OTTHUMG00000078368 | OTTHUMT00000171190 | chr21:25690670-25724192 | - | 627  |
| OTTHUMG00000078370 | OTTHUMT00000171193 | chr21:25809656-25812521 | - | 1044 |
| OTTHUMG00000078482 | OTTHUMT00000171423 | chr21:26643970-26644824 | - | 514  |
| OTTHUMG00000078707 | OTTHUMT00000171682 | chr21:27932883-27947681 | + | 465  |
| OTTHUMG00000078708 | OTTHUMT00000171683 | chr21:28016569-28045423 | + | 520  |
| OTTHUMG00000078708 | OTTHUMT00000171684 | chr21:28016588-28045423 | + | 505  |
| OTTHUMG00000078708 | OTTHUMT00000171685 | chr21:28018989-28045423 | + | 568  |
| OTTHUMG00000074159 | OTTHUMT00000157552 | chr21:28249111-28279485 | + | 569  |
| OTTHUMG00000074158 | OTTHUMT00000157551 | chr21:28307553-28317423 | + | 605  |
| OTTHUMG00000078709 | OTTHUMT00000171686 | chr21:28342604-28431801 | + | 1749 |
| OTTHUMG00000078709 | OTTHUMT00000171689 | chr21:28342637-28397770 | + | 1120 |
| OTTHUMG00000078709 | OTTHUMT00000171688 | chr21:28384504-28396980 | + | 447  |
| OTTHUMG00000078709 | OTTHUMT00000171687 | chr21:28384635-28397430 | + | 819  |
| OTTHUMG00000078706 | OTTHUMT00000171679 | chr21:28410284-28522857 | - | 4480 |
| OTTHUMG00000078706 | OTTHUMT00000171680 | chr21:28457792-28464333 | - | 273  |
| OTTHUMG00000078706 | OTTHUMT00000171681 | chr21:28506496-28522670 | - | 439  |
| OTTHUMG00000078747 | OTTHUMT00000171733 | chr21:28738741-28920797 | - | 678  |
| OTTHUMG00000078747 | OTTHUMT00000171732 | chr21:28738741-28969041 | - | 895  |
| OTTHUMG00000078748 | OTTHUMT00000171735 | chr21:28833511-28834548 | + | 868  |
| OTTHUMG00000078748 | OTTHUMT00000171736 | chr21:28833511-28834548 | + | 512  |
| OTTHUMG00000078747 | OTTHUMT00000171734 | chr21:28965174-28968966 | - | 441  |
| OTTHUMG00000078877 | OTTHUMT00000171972 | chr21:29476219-29481987 | - | 325  |
| OTTHUMG00000081871 | OTTHUMT00000182259 | chr21:30503340-30505972 | - | 421  |
| OTTHUMG00000057796 | OTTHUMT00000128248 | chr21:31123228-31123949 | - | 721  |
| OTTHUMG00000085307 | OTTHUMT00000193089 | chr21:32374500-32380479 | - | 435  |
| OTTHUMG00000085307 | OTTHUMT00000193088 | chr21:32374500-32491996 | - | 424  |
| OTTHUMG00000064921 | OTTHUMT00000139402 | chr21:32687310-32688140 | + | 830  |
| OTTHUMG00000064934 | OTTHUMT00000139450 | chr21:33138547-33144114 | - | 382  |
| OTTHUMG00000065034 | OTTHUMT00000139665 | chr21:33253066-33254744 | + | 574  |
| OTTHUMG00000065060 | OTTHUMT00000139726 | chr21:33352005-33359159 | + | 748  |
| OTTHUMG00000065062 | OTTHUMT00000139728 | chr21:33405875-33417879 | - | 1358 |
| OTTHUMG00000065063 | OTTHUMT00000139729 | chr21:33450808-33453286 | + | 447  |
| OTTHUMG00000065530 | OTTHUMT00000140453 | chr21:33776676-33778435 | - | 663  |
| OTTHUMG00000065819 | OTTHUMT00000141032 | chr21:34225334-34271862 | + | 9121 |
| OTTHUMG00000065819 | OTTHUMT00000193773 | chr21:34225388-34265357 | + | 2087 |
| OTTHUMG00000085959 | OTTHUMT00000193777 | chr21:34243100-34258130 | + | 2259 |
| OTTHUMG00000086190 | OTTHUMT00000194069 | chr21:34474848-34477416 | + | 653  |
| OTTHUMG00000086190 | OTTHUMT00000194070 | chr21:34474915-34482733 | + | 394  |
| OTTHUMG00000086190 | OTTHUMT00000194072 | chr21:34474919-34484090 | + | 1196 |



|                    |                    |                         |   |      |
|--------------------|--------------------|-------------------------|---|------|
| OTTHUMG00000086190 | OTTHUMT00000194071 | chr21:34482519-34483368 | + | 743  |
| OTTHUMG00000086234 | OTTHUMT00000194141 | chr21:35017975-35031348 | - | 687  |
| OTTHUMG00000086233 | OTTHUMT00000194139 | chr21:35039924-35079053 | + | 2629 |
| OTTHUMG00000086233 | OTTHUMT00000194140 | chr21:35040004-35042534 | + | 765  |
| OTTHUMG00000086303 | OTTHUMT00000194246 | chr21:35430805-35433389 | + | 696  |
| OTTHUMG00000086463 | OTTHUMT00000194413 | chr21:36299506-36301769 | + | 809  |
| OTTHUMG00000086614 | OTTHUMT00000194629 | chr21:36377027-36384582 | + | 346  |
| OTTHUMG00000153500 | OTTHUMT00000331385 | chr21:36399049-36403858 | + | 2334 |
| OTTHUMG00000086644 | OTTHUMT00000194710 | chr21:36926849-36931201 | - | 1131 |
| OTTHUMG00000090768 | OTTHUMT00000207543 | chr21:38617427-38627156 | - | 603  |
| OTTHUMG00000090768 | OTTHUMT00000207542 | chr21:38620144-38627213 | - | 419  |
| OTTHUMG00000086700 | OTTHUMT00000194935 | chr21:39140041-39142438 | + | 485  |
| OTTHUMG00000066036 | OTTHUMT00000194933 | chr21:39174101-39250262 | - | 403  |
| OTTHUMG00000066032 | OTTHUMT00000141402 | chr21:39268225-39271570 | - | 1595 |
| OTTHUMG00000066035 | OTTHUMT00000141409 | chr21:39282503-39299949 | - | 1409 |
| OTTHUMG00000086702 | OTTHUMT00000194937 | chr21:39300444-39305125 | - | 506  |
| OTTHUMG00000066033 | OTTHUMT00000141403 | chr21:39322331-39322923 | - | 290  |
| OTTHUMG00000133705 | OTTHUMT00000257965 | chr21:39610955-39617014 | + | 466  |
| OTTHUMG00000086723 | OTTHUMT00000195003 | chr21:40021552-40024477 | + | 1539 |
| OTTHUMG00000086723 | OTTHUMT00000195004 | chr21:40021643-40023481 | + | 698  |
| OTTHUMG00000086741 | OTTHUMT00000195053 | chr21:41435297-41441930 | - | 2086 |
| OTTHUMG00000086741 | OTTHUMT00000195054 | chr21:41436939-41441220 | - | 347  |
| OTTHUMG00000086741 | OTTHUMT00000195055 | chr21:41436977-41441230 | - | 577  |
| OTTHUMG00000086925 | OTTHUMT00000195852 | chr21:44729888-44734599 | + | 910  |
| OTTHUMG00000090296 | OTTHUMT00000206656 | chr21:45234207-45238412 | - | 2133 |
| OTTHUMG00000090296 | OTTHUMT00000206655 | chr21:45234207-45238429 | - | 2153 |
| OTTHUMG00000090292 | OTTHUMT00000206637 | chr21:45243550-45249070 | - | 732  |
| OTTHUMG00000084875 | OTTHUMT00000192579 | chr21:45478695-45503073 | + | 527  |
| OTTHUMG00000090409 | OTTHUMT00000206835 | chr21:45544588-45549600 | - | 2320 |
| OTTHUMG00000090402 | OTTHUMT00000206822 | chr21:45581050-45583008 | + | 377  |
| OTTHUMG00000090404 | OTTHUMT00000206824 | chr21:45582933-45586333 | - | 453  |
| OTTHUMG00000090400 | OTTHUMT00000206820 | chr21:45622544-45623967 | - | 317  |
| OTTHUMG00000090400 | OTTHUMT00000206819 | chr21:45622679-45623978 | - | 186  |
| OTTHUMG00000090408 | OTTHUMT00000206834 | chr21:45837996-45841351 | + | 672  |
| OTTHUMG00000090408 | OTTHUMT00000206833 | chr21:45838020-45841433 | + | 818  |
| OTTHUMG00000090405 | OTTHUMT00000206825 | chr21:45994970-45997328 | + | 746  |
| OTTHUMG00000090417 | OTTHUMT00000206848 | chr21:46072303-46080761 | - | 3463 |
| OTTHUMG00000090443 | OTTHUMT00000206885 | chr21:46281394-46284149 | + | 2196 |
| OTTHUMG00000090442 | OTTHUMT00000206884 | chr21:46296938-46297447 | + | 413  |
| OTTHUMG00000090439 | OTTHUMT00000206876 | chr21:46300858-46301909 | + | 353  |
| OTTHUMG00000140195 | OTTHUMT00000276574 | chr22:14442157-14443236 | + | 584  |
| OTTHUMG00000140260 | OTTHUMT00000276778 | chr22:14579666-14592276 | - | 516  |
| OTTHUMG00000140260 | OTTHUMT00000276779 | chr22:14579666-14611333 | - | 621  |
| OTTHUMG00000140260 | OTTHUMT00000276955 | chr22:14579793-14581002 | - | 530  |
| OTTHUMG00000140353 | OTTHUMT00000277001 | chr22:14753081-14757055 | + | 1727 |

|                    |                    |                         |   |      |
|--------------------|--------------------|-------------------------|---|------|
| OTTHUMG00000153504 | OTTHUMT00000331389 | chr22:15607759-15609535 | - | 1239 |
| OTTHUMG00000147348 | OTTHUMT00000303966 | chr22:15730368-15732016 | + | 498  |
| OTTHUMG00000150027 | OTTHUMT00000315626 | chr22:15897460-15919682 | + | 2722 |
| OTTHUMG00000150027 | OTTHUMT00000315824 | chr22:15898102-15917448 | + | 542  |
| OTTHUMG00000150063 | OTTHUMT00000316076 | chr22:16117749-16127623 | - | 1912 |
| OTTHUMG00000150065 | OTTHUMT00000316085 | chr22:16189924-16190122 | + | 198  |
| OTTHUMG00000153506 | OTTHUMT00000331424 | chr22:16892151-16900734 | + | 2377 |
| OTTHUMG00000149977 | OTTHUMT00000314912 | chr22:17338027-17362141 | + | 5487 |
| OTTHUMG00000149977 | OTTHUMT00000314911 | chr22:17338038-17398742 | + | 1280 |
| OTTHUMG00000149977 | OTTHUMT00000316630 | chr22:17338096-17358396 | + | 564  |
| OTTHUMG00000149977 | OTTHUMT00000316503 | chr22:17365787-17382299 | + | 763  |
| OTTHUMG00000150429 | OTTHUMT00000318064 | chr22:18034546-18035078 | + | 285  |
| OTTHUMG00000150567 | OTTHUMT00000318944 | chr22:18566296-18572440 | + | 2179 |
| OTTHUMG00000150594 | OTTHUMT00000319043 | chr22:18705557-18712103 | + | 412  |
| OTTHUMG00000150594 | OTTHUMT00000319042 | chr22:18705590-18709425 | + | 539  |
| OTTHUMG00000150594 | OTTHUMT00000319010 | chr22:18706328-18730457 | + | 3278 |
| OTTHUMG00000150594 | OTTHUMT00000319011 | chr22:18706399-18730450 | + | 1850 |
| OTTHUMG00000150594 | OTTHUMT00000319041 | chr22:18706433-18719632 | + | 563  |
| OTTHUMG00000150594 | OTTHUMT00000319044 | chr22:18706440-18720116 | + | 560  |
| OTTHUMG00000150594 | OTTHUMT00000319045 | chr22:18706468-18722070 | + | 742  |
| OTTHUMG00000150594 | OTTHUMT00000319074 | chr22:18708439-18709229 | + | 321  |
| OTTHUMG00000150594 | OTTHUMT00000319012 | chr22:18708520-18721557 | + | 1856 |
| OTTHUMG00000150605 | OTTHUMT00000319056 | chr22:18710726-18711888 | - | 444  |
| OTTHUMG00000150610 | OTTHUMT00000319069 | chr22:18716866-18718449 | - | 373  |
| OTTHUMG00000150610 | OTTHUMT00000319068 | chr22:18717736-18721114 | - | 818  |
| OTTHUMG00000150594 | OTTHUMT00000319075 | chr22:18719070-18720012 | + | 476  |
| OTTHUMG00000150594 | OTTHUMT00000319013 | chr22:18721496-18730456 | + | 3786 |
| OTTHUMG00000150594 | OTTHUMT00000319014 | chr22:18721808-18725074 | + | 878  |
| OTTHUMG00000150594 | OTTHUMT00000319065 | chr22:18725296-18730454 | + | 429  |
| OTTHUMG00000150594 | OTTHUMT00000319066 | chr22:18725317-18725766 | + | 325  |
| OTTHUMG00000150646 | OTTHUMT00000322210 | chr22:18757669-18758803 | + | 851  |
| OTTHUMG00000152507 | OTTHUMT00000319436 | chr22:18758814-18760089 | + | 458  |
| OTTHUMG00000152507 | OTTHUMT00000319437 | chr22:18758909-18760045 | + | 348  |
| OTTHUMG00000152507 | OTTHUMT00000319430 | chr22:18758933-18760071 | + | 469  |
| OTTHUMG00000152507 | OTTHUMT00000319426 | chr22:18758938-18760071 | + | 316  |
| OTTHUMG00000152507 | OTTHUMT00000319431 | chr22:18759276-18760440 | + | 784  |
| OTTHUMG00000150683 | OTTHUMT00000319604 | chr22:18962132-18986828 | - | 1850 |
| OTTHUMG00000150683 | OTTHUMT00000319602 | chr22:18970889-18986782 | - | 547  |
| OTTHUMG00000150683 | OTTHUMT00000319603 | chr22:18970968-18991407 | - | 718  |
| OTTHUMG00000150684 | OTTHUMT00000319605 | chr22:18974408-18975991 | + | 373  |
| OTTHUMG00000150686 | OTTHUMT00000319609 | chr22:19022509-19036406 | + | 468  |
| OTTHUMG00000150795 | OTTHUMT00000320107 | chr22:19985279-20009331 | - | 3203 |
| OTTHUMG00000150795 | OTTHUMT00000320109 | chr22:19985280-19994170 | - | 3711 |
| OTTHUMG00000150795 | OTTHUMT00000320108 | chr22:19985286-20009331 | - | 1921 |
| OTTHUMG00000150795 | OTTHUMT00000320115 | chr22:19994110-20007143 | - | 1850 |

|                    |                    |                         |   |      |
|--------------------|--------------------|-------------------------|---|------|
| OTTHUMG00000150795 | OTTHUMT00000320111 | chr22:19996029-20009226 | - | 563  |
| OTTHUMG00000150795 | OTTHUMT00000320110 | chr22:19996029-20009331 | - | 665  |
| OTTHUMG00000150793 | OTTHUMT00000320091 | chr22:19997209-19999193 | + | 773  |
| OTTHUMG00000150795 | OTTHUMT00000320112 | chr22:20003559-20009256 | - | 412  |
| OTTHUMG00000150795 | OTTHUMT00000320113 | chr22:20006237-20009256 | - | 573  |
| OTTHUMG00000150795 | OTTHUMT00000320114 | chr22:20006430-20007224 | - | 325  |
| OTTHUMG00000151038 | OTTHUMT00000321097 | chr22:20978098-20979159 | + | 522  |
| OTTHUMG00000151209 | OTTHUMT00000321813 | chr22:21365263-21365797 | - | 449  |
| OTTHUMG00000150838 | OTTHUMT00000320286 | chr22:21998803-22000680 | + | 344  |
| OTTHUMG00000150668 | OTTHUMT00000319542 | chr22:22105751-22107258 | + | 914  |
| OTTHUMG00000150668 | OTTHUMT00000319543 | chr22:22106358-22106918 | + | 335  |
| OTTHUMG00000150840 | OTTHUMT00000320304 | chr22:22184681-22185789 | + | 475  |
| OTTHUMG00000150865 | OTTHUMT00000320348 | chr22:23938709-23939652 | + | 480  |
| OTTHUMG00000150906 | OTTHUMT00000320493 | chr22:24005496-24008258 | - | 426  |
| OTTHUMG00000150906 | OTTHUMT00000320492 | chr22:24007253-24008641 | - | 423  |
| OTTHUMG00000150906 | OTTHUMT00000320494 | chr22:24007804-24009061 | - | 566  |
| OTTHUMG00000151344 | OTTHUMT00000322322 | chr22:24887800-24890269 | + | 186  |
| OTTHUMG00000151345 | OTTHUMT00000322323 | chr22:24887876-24889180 | - | 354  |
| OTTHUMG00000150979 | OTTHUMT00000320766 | chr22:25584597-25591749 | + | 6040 |
| OTTHUMG00000151357 | OTTHUMT00000322347 | chr22:25629255-25634076 | + | 506  |
| OTTHUMG00000151357 | OTTHUMT00000322346 | chr22:25629303-25646574 | + | 514  |
| OTTHUMG00000150945 | OTTHUMT00000320625 | chr22:25869439-25885840 | + | 471  |
| OTTHUMG00000150949 | OTTHUMT00000320629 | chr22:25930173-25931088 | + | 306  |
| OTTHUMG00000150955 | OTTHUMT00000320636 | chr22:25947310-25950688 | - | 634  |
| OTTHUMG00000150955 | OTTHUMT00000320635 | chr22:25949258-25950618 | - | 549  |
| OTTHUMG00000150952 | OTTHUMT00000320632 | chr22:26002201-26012310 | + | 271  |
| OTTHUMG00000150956 | OTTHUMT00000320637 | chr22:26033444-26044499 | - | 575  |
| OTTHUMG00000150947 | OTTHUMT00000320627 | chr22:26036612-26043417 | + | 5050 |
| OTTHUMG00000150950 | OTTHUMT00000320630 | chr22:26057748-26105226 | + | 567  |
| OTTHUMG00000150954 | OTTHUMT00000320634 | chr22:26183208-26186021 | - | 768  |
| OTTHUMG00000150951 | OTTHUMT00000320631 | chr22:26289800-26299534 | - | 574  |
| OTTHUMG00000150948 | OTTHUMT00000320628 | chr22:26402556-26440959 | - | 814  |
| OTTHUMG00000150946 | OTTHUMT00000320626 | chr22:26433578-26435929 | + | 113  |
| OTTHUMG00000150974 | OTTHUMT00000320736 | chr22:26442468-26447665 | + | 449  |
| OTTHUMG00000151290 | OTTHUMT00000322096 | chr22:28197930-28204059 | - | 568  |
| OTTHUMG00000030444 | OTTHUMT00000075332 | chr22:29695643-29704831 | + | 6474 |
| OTTHUMG00000030444 | OTTHUMT00000158310 | chr22:29697353-29704831 | + | 4888 |
| OTTHUMG00000058207 | OTTHUMT00000128923 | chr22:30689344-30696387 | + | 471  |
| OTTHUMG00000150005 | OTTHUMT00000315721 | chr22:30696810-30699461 | + | 176  |
| OTTHUMG00000150005 | OTTHUMT00000315722 | chr22:30696848-30699462 | + | 295  |
| OTTHUMG00000073689 | OTTHUMT00000156190 | chr22:30867254-30869259 | + | 272  |
| OTTHUMG00000073688 | OTTHUMT00000156189 | chr22:30999407-31003173 | + | 588  |
| OTTHUMG00000058271 | OTTHUMT00000129026 | chr22:31053158-31069092 | - | 359  |
| OTTHUMG00000058267 | OTTHUMT00000129022 | chr22:31102651-31110330 | + | 1555 |
| OTTHUMG00000150006 | OTTHUMT00000315723 | chr22:31109773-31111618 | + | 442  |

|                    |                    |                          |   |      |
|--------------------|--------------------|--------------------------|---|------|
| OTTHUMG00000030382 | OTTHUMT00000128992 | chr22:31831369-31832045  | - | 435  |
| OTTHUMG00000151001 | OTTHUMT00000320911 | chr22:37647178-37650659  | + | 676  |
| OTTHUMG00000151004 | OTTHUMT00000321237 | chr22:37678692-37679367  | + | 564  |
| OTTHUMG00000151191 | OTTHUMT00000321691 | chr22:37817585-37818806  | + | 589  |
| OTTHUMG00000153516 | OTTHUMT00000331463 | chr22:38018939-38021514  | + | 1776 |
| OTTHUMG00000150700 | OTTHUMT00000319662 | chr22:40995703-41000812  | + | 1240 |
| OTTHUMG00000150700 | OTTHUMT00000319663 | chr22:40995710-41001146  | + | 473  |
| OTTHUMG00000150700 | OTTHUMT00000319664 | chr22:40995718-41000983  | + | 547  |
| OTTHUMG00000150697 | OTTHUMT00000319657 | chr22:41002305-41003001  | + | 542  |
| OTTHUMG00000150696 | OTTHUMT00000319656 | chr22:41090350-41095118  | - | 778  |
| OTTHUMG00000150696 | OTTHUMT00000319655 | chr22:41090352-41095158  | - | 473  |
| OTTHUMG00000150696 | OTTHUMT00000319654 | chr22:41090475-41095186  | - | 1140 |
| OTTHUMG00000150919 | OTTHUMT00000320530 | chr22:41163973-41172145  | + | 568  |
| OTTHUMG00000150565 | OTTHUMT00000318937 | chr22:42126281-42135631  | + | 947  |
| OTTHUMG00000150468 | OTTHUMT00000318225 | chr22:43217871-43219332  | + | 627  |
| OTTHUMG00000149974 | OTTHUMT00000314900 | chr22:43381483-43399963  | - | 496  |
| OTTHUMG00000151333 | OTTHUMT00000322253 | chr22:44210408-44223288  | - | 543  |
| OTTHUMG00000150449 | OTTHUMT00000318140 | chr22:44650543-44662292  | - | 802  |
| OTTHUMG00000150406 | OTTHUMT00000317992 | chr22:44814810-44819154  | - | 2581 |
| OTTHUMG00000150406 | OTTHUMT00000317993 | chr22:44815553-44819397  | - | 489  |
| OTTHUMG00000150405 | OTTHUMT00000317991 | chr22:45316056-45322757  | + | 2947 |
| OTTHUMG00000150328 | OTTHUMT00000317578 | chr22:46119983-46147955  | + | 4360 |
| OTTHUMG00000150319 | OTTHUMT00000317554 | chr22:46635084-46636475  | + | 217  |
| OTTHUMG00000150320 | OTTHUMT00000317555 | chr22:46819191-46823030  | - | 370  |
| OTTHUMG00000150310 | OTTHUMT00000317512 | chr22:47223366-47225693  | + | 566  |
| OTTHUMG00000030424 | OTTHUMT00000317435 | chr22:48195429-48205090  | - | 737  |
| OTTHUMG00000150297 | OTTHUMT00000317428 | chr22:48497705-48504158  | - | 3773 |
| OTTHUMG00000153517 | OTTHUMT00000331464 | chr22:48612268-48617438  | + | 1565 |
| OTTHUMG00000153518 | OTTHUMT00000331465 | chr22:48769920-48773655  | + | 1014 |
| OTTHUMG00000118999 | OTTHUMT00000239196 | chr4:1135160-1137489     | + | 2163 |
| OTTHUMG00000151319 | OTTHUMT00000322216 | chr4:74794883-74799108   | + | 572  |
| OTTHUMG00000059449 | OTTHUMT00000132196 | chr4:118455201-118501243 | - | 728  |
| OTTHUMG00000059445 | OTTHUMT00000132190 | chr4:118501953-118513339 | + | 598  |
| OTTHUMG00000059450 | OTTHUMT00000291362 | chr4:118569000-118831628 | + | 2339 |
| OTTHUMG00000059447 | OTTHUMT00000132194 | chr4:118975004-119010551 | + | 574  |
| OTTHUMG00000131146 | OTTHUMT00000253838 | chr5:43077434-43081249   | + | 1341 |
| OTTHUMG00000131146 | OTTHUMT00000253837 | chr5:43077952-43081249   | + | 2421 |
| OTTHUMG00000150053 | OTTHUMT00000316046 | chr5:56102383-56103880   | + | 776  |
| OTTHUMG00000099413 | OTTHUMT00000216872 | chr5:70707369-70717292   | + | 1828 |
| OTTHUMG00000099413 | OTTHUMT00000280612 | chr5:70707369-70717292   | + | 609  |
| OTTHUMG00000099413 | OTTHUMT00000280613 | chr5:70707369-70717292   | + | 571  |
| OTTHUMG00000099413 | OTTHUMT00000280615 | chr5:70707369-70717292   | + | 647  |
| OTTHUMG00000099413 | OTTHUMT00000280616 | chr5:70707369-70717292   | + | 651  |
| OTTHUMG00000099413 | OTTHUMT00000280614 | chr5:70707369-70717576   | + | 1837 |
| OTTHUMG00000122084 | OTTHUMT00000314058 | chr5:95213692-95218440   | + | 584  |

|                    |                    |                          |   |      |
|--------------------|--------------------|--------------------------|---|------|
| OTTHUMG00000122084 | OTTHUMT00000242845 | chr5:95213692-95221593   | + | 2048 |
| OTTHUMG00000122084 | OTTHUMT00000314057 | chr5:95213695-95221590   | + | 1805 |
| OTTHUMG00000059642 | OTTHUMT00000132641 | chr5:131542826-131544720 | - | 379  |
| OTTHUMG00000059704 | OTTHUMT00000132743 | chr5:142105349-142120747 | + | 2233 |
| OTTHUMG00000014111 | OTTHUMT00000039619 | chr6:100135-101639       | + | 748  |
| OTTHUMG00000014110 | OTTHUMT00000039618 | chr6:169950-171400       | + | 841  |
| OTTHUMG00000014118 | OTTHUMT00000039629 | chr6:903563-907511       | - | 401  |
| OTTHUMG00000014123 | OTTHUMT00000039634 | chr6:2582169-2585234     | + | 832  |
| OTTHUMG00000014127 | OTTHUMT00000039645 | chr6:2799890-2821743     | - | 1585 |
| OTTHUMG00000014132 | OTTHUMT00000039657 | chr6:2862127-2862966     | + | 482  |
| OTTHUMG00000014138 | OTTHUMT00000039667 | chr6:2996334-2997316     | - | 270  |
| OTTHUMG00000014138 | OTTHUMT00000039668 | chr6:2996334-2998986     | - | 333  |
| OTTHUMG00000014138 | OTTHUMT00000039666 | chr6:2997196-2998997     | - | 314  |
| OTTHUMG00000014139 | OTTHUMT00000039669 | chr6:3001123-3001994     | + | 396  |
| OTTHUMG00000014141 | OTTHUMT00000039674 | chr6:3127977-3140980     | - | 1467 |
| OTTHUMG00000014141 | OTTHUMT00000039673 | chr6:3127977-3140989     | - | 1503 |
| OTTHUMG00000014145 | OTTHUMT00000039687 | chr6:3539480-3569980     | - | 786  |
| OTTHUMG00000014150 | OTTHUMT00000039697 | chr6:3838359-3839523     | + | 438  |
| OTTHUMG00000014150 | OTTHUMT00000039696 | chr6:3839073-3839523     | + | 450  |
| OTTHUMG00000014161 | OTTHUMT00000039726 | chr6:4100169-4101132     | + | 475  |
| OTTHUMG00000014164 | OTTHUMT00000039729 | chr6:4171934-4172504     | + | 234  |
| OTTHUMG00000014165 | OTTHUMT00000039730 | chr6:4290976-4292270     | - | 328  |
| OTTHUMG00000014182 | OTTHUMT00000039751 | chr6:5796738-5815452     | + | 409  |
| OTTHUMG00000014185 | OTTHUMT00000039755 | chr6:5820163-5821102     | - | 359  |
| OTTHUMG00000014191 | OTTHUMT00000039763 | chr6:6637976-6659207     | + | 895  |
| OTTHUMG00000014193 | OTTHUMT00000039765 | chr6:6703510-6704523     | - | 386  |
| OTTHUMG00000014195 | OTTHUMT00000039767 | chr6:6846254-6863947     | + | 931  |
| OTTHUMG00000014196 | OTTHUMT00000039768 | chr6:6938423-6940786     | + | 514  |
| OTTHUMG00000014222 | OTTHUMT00000039800 | chr6:8273383-8287687     | + | 524  |
| OTTHUMG00000014223 | OTTHUMT00000039801 | chr6:8287169-8288253     | - | 744  |
| OTTHUMG00000014225 | OTTHUMT00000039803 | chr6:8729410-8730677     | + | 487  |
| OTTHUMG00000014226 | OTTHUMT00000039804 | chr6:9069453-9107009     | - | 658  |
| OTTHUMG00000014230 | OTTHUMT00000039808 | chr6:10531359-10534395   | - | 536  |
| OTTHUMG00000014232 | OTTHUMT00000039810 | chr6:10582719-10586721   | - | 254  |
| OTTHUMG00000014256 | OTTHUMT00000039859 | chr6:11525569-11589458   | + | 696  |
| OTTHUMG00000014261 | OTTHUMT00000039866 | chr6:11918821-11919467   | + | 552  |
| OTTHUMG00000014263 | OTTHUMT00000039868 | chr6:12098562-12100231   | - | 274  |
| OTTHUMG00000014264 | OTTHUMT00000039869 | chr6:12115889-12117075   | + | 781  |
| OTTHUMG00000014269 | OTTHUMT00000039875 | chr6:12691133-12693622   | - | 892  |
| OTTHUMG00000014282 | OTTHUMT00000039915 | chr6:14113130-14115111   | + | 384  |
| OTTHUMG00000014284 | OTTHUMT00000039917 | chr6:14337985-14339780   | - | 468  |
| OTTHUMG00000014285 | OTTHUMT00000039918 | chr6:14388337-14393355   | - | 3150 |
| OTTHUMG00000014287 | OTTHUMT00000039920 | chr6:14499441-14501498   | - | 485  |
| OTTHUMG00000014286 | OTTHUMT00000039919 | chr6:14502536-14512499   | + | 402  |
| OTTHUMG00000014288 | OTTHUMT00000039921 | chr6:14705724-14707900   | - | 145  |

|                     |                    |                        |   |      |
|---------------------|--------------------|------------------------|---|------|
| OTTHUMG00000014289  | OTTHUMT00000039922 | chr6:14949434-14979938 | + | 175  |
| OTTHUMG00000014290  | OTTHUMT00000039923 | chr6:15084998-15198213 | - | 1013 |
| OTTHUMG00000014297  | OTTHUMT00000039937 | chr6:16103154-16108007 | + | 843  |
| OTTHUMG00000014304  | OTTHUMT00000039944 | chr6:17218705-17228968 | + | 713  |
| OTTHUMG00000014305  | OTTHUMT00000039945 | chr6:17236148-17239582 | + | 2083 |
| OTTHUMG00000014323  | OTTHUMT00000039967 | chr6:19151959-19169046 | + | 195  |
| OTTHUMG00000014325  | OTTHUMT00000039969 | chr6:19398529-19429231 | - | 379  |
| OTTHUMG00000014332  | OTTHUMT00000039978 | chr6:19798035-19861323 | - | 188  |
| OTTHUMG00000014331  | OTTHUMT00000039976 | chr6:19838637-19842777 | - | 468  |
| OTTHUMG00000014332  | OTTHUMT00000039977 | chr6:19848387-19857903 | - | 209  |
| OTTHUMG00000014330  | OTTHUMT00000039975 | chr6:19911581-19912856 | - | 1014 |
| OTTHUMG00000014330  | OTTHUMT00000039974 | chr6:19911817-19912952 | - | 370  |
| OTTHUMG00000014341  | OTTHUMT00000039988 | chr6:21462621-21463506 | + | 385  |
| OTTHUMG00000014342  | OTTHUMT00000039989 | chr6:21630686-21631982 | - | 541  |
| OTTHUMG00000014344  | OTTHUMT00000039991 | chr6:22088793-22089680 | - | 363  |
| OTTHUMG00000014345  | OTTHUMT00000039992 | chr6:22164754-22219136 | + | 325  |
| OTTHUMG00000014347  | OTTHUMT00000039994 | chr6:22697345-22702041 | - | 739  |
| OTTHUMG00000014350  | OTTHUMT00000039997 | chr6:23445918-23454767 | + | 308  |
| OTTHUMG00000014382  | OTTHUMT00000040034 | chr6:25150046-25164871 | + | 574  |
| OTTHUMG00000014379  | OTTHUMT00000040031 | chr6:25161834-25165280 | - | 426  |
| OTTHUMG00000014380  | OTTHUMT00000040032 | chr6:25169832-25171714 | - | 469  |
| OTTHUMG00000014456  | OTTHUMT00000040121 | chr6:26630055-26634786 | + | 4731 |
| OTTHUMG00000014466  | OTTHUMT00000040133 | chr6:27096211-27099682 | + | 504  |
| OTTHUMG00000014466  | OTTHUMT00000040134 | chr6:27096394-27099682 | + | 336  |
| OTTHUMG00000014513  | OTTHUMT00000040181 | chr6:28237538-28245351 | + | 1623 |
| OTTHUMG00000016245  | OTTHUMT00000043560 | chr6:28724042-28724822 | - | 535  |
| OTTHUMG00000084883  | OTTHUMT00000192595 | chr6:28913625-28914762 | - | 707  |
| OTTHUMG000000031281 | OTTHUMT00000076613 | chr6:28972286-28973078 | + | 411  |
| OTTHUMG000000031267 | OTTHUMT00000076582 | chr6:29061959-29063240 | + | 1029 |
| OTTHUMG000000031270 | OTTHUMT00000076588 | chr6:29062556-29064292 | + | 315  |
| OTTHUMG00000085915  | OTTHUMT00000193728 | chr6:29199966-29204664 | + | 387  |
| OTTHUMG00000086581  | OTTHUMT00000194570 | chr6:29573265-29586312 | + | 873  |
| OTTHUMG00000065812  | OTTHUMT00000140988 | chr6:29605176-29609324 | + | 2774 |
| OTTHUMG00000065812  | OTTHUMT00000194569 | chr6:29605232-29607913 | + | 395  |
| OTTHUMG00000132773  | OTTHUMT00000256179 | chr6:30592022-30594973 | + | 849  |
| OTTHUMG000000031193 | OTTHUMT00000076389 | chr6:30842581-30868006 | + | 1198 |
| OTTHUMG000000031193 | OTTHUMT00000257580 | chr6:30857714-30868006 | + | 1173 |
| OTTHUMG00000133550  | OTTHUMT00000257578 | chr6:30915282-30923915 | - | 796  |
| OTTHUMG000000031229 | OTTHUMT00000076474 | chr6:30942738-30951674 | - | 3992 |
| OTTHUMG00000133673  | OTTHUMT00000257856 | chr6:31105668-31110464 | + | 609  |
| OTTHUMG000000031179 | OTTHUMT00000076351 | chr6:31129963-31135632 | + | 1977 |
| OTTHUMG000000031054 | OTTHUMT00000156311 | chr6:31249491-31253655 | - | 590  |
| OTTHUMG00000133747  | OTTHUMT00000258150 | chr6:31517423-31522729 | + | 2139 |
| OTTHUMG00000140119  | OTTHUMT00000276168 | chr6:32793760-32794582 | + | 379  |
| OTTHUMG00000140119  | OTTHUMT00000276169 | chr6:32793785-32794587 | + | 393  |

|                    |                    |                        |   |      |
|--------------------|--------------------|------------------------|---|------|
| OTTHUMG00000140119 | OTTHUMT00000276170 | chr6:32794140-32794590 | + | 300  |
| OTTHUMG00000031166 | OTTHUMT00000076308 | chr6:33220538-33223522 | + | 715  |
| OTTHUMG00000014537 | OTTHUMT00000040212 | chr6:33989839-34000438 | + | 564  |
| OTTHUMG00000014542 | OTTHUMT00000040220 | chr6:34355460-34360244 | + | 4784 |
| OTTHUMG00000014544 | OTTHUMT00000040223 | chr6:34360245-34362523 | + | 2278 |
| OTTHUMG00000014573 | OTTHUMT00000040303 | chr6:35620387-35621424 | + | 592  |
| OTTHUMG00000014610 | OTTHUMT00000040379 | chr6:37015841-37020429 | + | 477  |
| OTTHUMG00000014621 | OTTHUMT00000040405 | chr6:37619307-37622509 | - | 732  |
| OTTHUMG00000014622 | OTTHUMT00000040406 | chr6:37622306-37623468 | + | 511  |
| OTTHUMG00000014623 | OTTHUMT00000040407 | chr6:37625758-37626614 | + | 440  |
| OTTHUMG00000014631 | OTTHUMT00000040429 | chr6:38238555-38239558 | - | 437  |
| OTTHUMG00000014635 | OTTHUMT00000040437 | chr6:38789805-38790971 | + | 398  |
| OTTHUMG00000014657 | OTTHUMT00000040480 | chr6:40347283-40351954 | - | 536  |
| OTTHUMG00000014660 | OTTHUMT00000040485 | chr6:40410671-40455602 | + | 914  |
| OTTHUMG00000014660 | OTTHUMT00000040486 | chr6:40416182-40455602 | + | 739  |
| OTTHUMG00000014659 | OTTHUMT00000040482 | chr6:40434461-40445191 | - | 822  |
| OTTHUMG00000014660 | OTTHUMT00000040483 | chr6:40454054-40455602 | + | 1012 |
| OTTHUMG00000014660 | OTTHUMT00000040484 | chr6:40454054-40455602 | + | 1163 |
| OTTHUMG00000014664 | OTTHUMT00000040490 | chr6:40789128-40791080 | - | 610  |
| OTTHUMG00000014672 | OTTHUMT00000040501 | chr6:41215572-41216548 | - | 447  |
| OTTHUMG00000014672 | OTTHUMT00000040502 | chr6:41215643-41216548 | - | 512  |
| OTTHUMG00000014672 | OTTHUMT00000040503 | chr6:41215779-41216548 | - | 376  |
| OTTHUMG00000046223 | OTTHUMT00000106561 | chr6:41457108-41457548 | - | 440  |
| OTTHUMG00000046224 | OTTHUMT00000106562 | chr6:41481535-41482277 | + | 742  |
| OTTHUMG00000014707 | OTTHUMT00000040563 | chr6:43016080-43019686 | + | 675  |
| OTTHUMG00000014749 | OTTHUMT00000040694 | chr6:43798501-43813549 | - | 345  |
| OTTHUMG00000014751 | OTTHUMT00000040698 | chr6:43927472-43928048 | - | 392  |
| OTTHUMG00000014754 | OTTHUMT00000040705 | chr6:44149628-44153667 | + | 1606 |
| OTTHUMG00000014768 | OTTHUMT00000040744 | chr6:44600974-44602469 | + | 470  |
| OTTHUMG00000014791 | OTTHUMT00000040804 | chr6:46829442-46834120 | + | 2549 |
| OTTHUMG00000014792 | OTTHUMT00000040805 | chr6:46833992-46836854 | - | 759  |
| OTTHUMG00000014802 | OTTHUMT00000040822 | chr6:47805522-47816436 | - | 195  |
| OTTHUMG00000014825 | OTTHUMT00000040873 | chr6:49892427-49893157 | + | 158  |
| OTTHUMG00000014826 | OTTHUMT00000040874 | chr6:49893102-49896114 | + | 378  |
| OTTHUMG00000014828 | OTTHUMT00000040876 | chr6:49899384-49900454 | - | 397  |
| OTTHUMG00000014829 | OTTHUMT00000040877 | chr6:50169383-50174954 | + | 690  |
| OTTHUMG00000014830 | OTTHUMT00000040878 | chr6:50589707-50596776 | + | 283  |
| OTTHUMG00000014831 | OTTHUMT00000040880 | chr6:50663279-50712537 | - | 441  |
| OTTHUMG00000014831 | OTTHUMT00000040879 | chr6:50674263-50712877 | - | 558  |
| OTTHUMG00000014842 | OTTHUMT00000040895 | chr6:52119571-52124182 | - | 514  |
| OTTHUMG00000014878 | OTTHUMT00000040960 | chr6:53355094-53355491 | - | 354  |
| OTTHUMG00000014879 | OTTHUMT00000040961 | chr6:53542048-53546022 | - | 379  |
| OTTHUMG00000014881 | OTTHUMT00000040964 | chr6:53601137-53604151 | + | 563  |
| OTTHUMG00000014883 | OTTHUMT00000040966 | chr6:53713506-53719779 | - | 847  |
| OTTHUMG00000014887 | OTTHUMT00000040975 | chr6:53902938-53970052 | + | 2593 |

|                     |                     |                        |   |      |
|---------------------|---------------------|------------------------|---|------|
| OTTHUMG00000014886  | OTTHUMT00000040974  | chr6:53927195-53927853 | - | 599  |
| OTTHUMG00000014890  | OTTHUMT00000040978  | chr6:53971647-53979909 | + | 639  |
| OTTHUMG00000014898  | OTTHUMT00000040993  | chr6:54812875-54813612 | - | 584  |
| OTTHUMG00000014922  | OTTHUMT00000041048  | chr6:57798854-57799604 | + | 313  |
| OTTHUMG00000014933  | OTTHUMT00000041063  | chr6:58596847-58596986 | + | 139  |
| OTTHUMG00000014954  | OTTHUMT00000041090  | chr6:64574688-64590494 | + | 1452 |
| OTTHUMG00000014957  | OTTHUMT00000041093  | chr6:65145647-65179393 | + | 521  |
| OTTHUMG00000014978  | OTTHUMT00000041116  | chr6:68821964-68827115 | + | 490  |
| OTTHUMG00000014979  | OTTHUMT00000041117  | chr6:68993585-69096512 | - | 670  |
| OTTHUMG00000014981  | OTTHUMT00000041119  | chr6:69399276-69400937 | - | 532  |
| OTTHUMG00000014989  | OTTHUMT00000041135  | chr6:71161311-71165841 | + | 394  |
| OTTHUMG00000015002  | OTTHUMT00000041156  | chr6:72095366-72096230 | + | 350  |
| OTTHUMG00000015006  | OTTHUMT00000041155  | chr6:72110768-72186527 | - | 658  |
| OTTHUMG00000015006  | OTTHUMT00000041167  | chr6:72111010-72186690 | - | 662  |
| OTTHUMG00000015006  | OTTHUMT00000041168  | chr6:72180870-72187193 | - | 2953 |
| OTTHUMG00000015006  | OTTHUMT00000041165  | chr6:72182808-72186691 | - | 448  |
| OTTHUMG00000015006  | OTTHUMT00000041166  | chr6:72182901-72186691 | - | 471  |
| OTTHUMG00000015005  | OTTHUMT00000041164  | chr6:72217258-72225298 | + | 450  |
| OTTHUMG00000015045  | OTTHUMT00000041236  | chr6:75408820-75418438 | + | 439  |
| OTTHUMG00000015064  | OTTHUMT00000041290  | chr6:77288887-77360059 | + | 566  |
| OTTHUMG000000153472 | OTTHUMT000000331298 | chr6:78457261-78527590 | + | 102  |
| OTTHUMG00000015068  | OTTHUMT00000041294  | chr6:79370903-79372472 | - | 385  |
| OTTHUMG00000015069  | OTTHUMT00000041295  | chr6:79576151-79579739 | - | 2630 |
| OTTHUMG00000015075  | OTTHUMT00000041303  | chr6:80036814-80037388 | + | 258  |
| OTTHUMG00000015079  | OTTHUMT00000041307  | chr6:80186733-80187741 | + | 471  |
| OTTHUMG00000015082  | OTTHUMT00000041310  | chr6:80570019-80573661 | - | 478  |
| OTTHUMG00000015084  | OTTHUMT00000041312  | chr6:80638309-80641046 | + | 323  |
| OTTHUMG00000015092  | OTTHUMT00000041321  | chr6:81209780-81232363 | + | 678  |
| OTTHUMG00000015092  | OTTHUMT00000041323  | chr6:81209892-81229643 | + | 754  |
| OTTHUMG00000015092  | OTTHUMT00000041322  | chr6:81209892-81232291 | + | 727  |
| OTTHUMG00000015099  | OTTHUMT00000041334  | chr6:82579722-82580593 | - | 518  |
| OTTHUMG00000015101  | OTTHUMT00000041336  | chr6:82611621-82699916 | - | 819  |
| OTTHUMG00000015116  | OTTHUMT00000041359  | chr6:84494493-84502963 | - | 349  |
| OTTHUMG00000015119  | OTTHUMT00000041365  | chr6:84750166-84773761 | + | 831  |
| OTTHUMG00000015120  | OTTHUMT00000041366  | chr6:84789493-84790991 | + | 338  |
| OTTHUMG00000015137  | OTTHUMT00000041386  | chr6:86153656-86156623 | - | 2511 |
| OTTHUMG00000015172  | OTTHUMT00000041439  | chr6:88138030-88159238 | + | 538  |
| OTTHUMG00000015187  | OTTHUMT00000041466  | chr6:89065388-89187471 | - | 302  |
| OTTHUMG00000015211  | OTTHUMT00000041506  | chr6:90686636-90688200 | + | 754  |
| OTTHUMG00000015218  | OTTHUMT00000041535  | chr6:92156752-92159439 | - | 439  |
| OTTHUMG00000015221  | OTTHUMT00000041538  | chr6:92396354-92456867 | - | 729  |
| OTTHUMG00000015224  | OTTHUMT00000041541  | chr6:93489442-93490268 | - | 591  |
| OTTHUMG00000015229  | OTTHUMT00000041547  | chr6:94653339-94655849 | + | 482  |
| OTTHUMG00000015230  | OTTHUMT00000041548  | chr6:94930359-94961097 | + | 263  |
| OTTHUMG00000015244  | OTTHUMT00000041565  | chr6:97339734-97350418 | + | 478  |



|                    |                     |                          |   |      |
|--------------------|---------------------|--------------------------|---|------|
| OTTHUMG00000015250 | OTTHUMT00000041578  | chr6:98256878-98262700   | + | 499  |
| OTTHUMG00000015251 | OTTHUMT00000041579  | chr6:98262356-98287309   | + | 355  |
| OTTHUMG00000015252 | OTTHUMT00000041580  | chr6:98265550-98271794   | - | 496  |
| OTTHUMG00000015254 | OTTHUMT00000041582  | chr6:98764617-98769280   | + | 769  |
| OTTHUMG00000015255 | OTTHUMT00000041583  | chr6:98829743-98834456   | + | 224  |
| OTTHUMG00000015256 | OTTHUMT00000041584  | chr6:99113031-99113168   | + | 137  |
| OTTHUMG00000015265 | OTTHUMT00000041605  | chr6:100075290-100086437 | + | 878  |
| OTTHUMG00000015298 | OTTHUMT00000041660  | chr6:106167235-106186764 | - | 583  |
| OTTHUMG00000015300 | OTTHUMT00000041665  | chr6:106913134-106914285 | - | 412  |
| OTTHUMG00000015306 | OTTHUMT00000041683  | chr6:107250103-107254562 | + | 416  |
| OTTHUMG00000015305 | OTTHUMT00000041679  | chr6:107272020-107341993 | - | 1380 |
| OTTHUMG00000015305 | OTTHUMT00000041678  | chr6:107272560-107341999 | - | 799  |
| OTTHUMG00000015305 | OTTHUMT00000041680  | chr6:107279183-107294655 | - | 646  |
| OTTHUMG00000015305 | OTTHUMT00000041676  | chr6:107301653-107326861 | - | 258  |
| OTTHUMG00000015305 | OTTHUMT00000041677  | chr6:107301658-107342042 | - | 567  |
| OTTHUMG00000015305 | OTTHUMT00000041682  | chr6:107301818-107342003 | - | 524  |
| OTTHUMG00000015305 | OTTHUMT00000041681  | chr6:107326686-107342047 | - | 624  |
| OTTHUMG00000015320 | OTTHUMT00000041714  | chr6:108551412-108584595 | + | 715  |
| OTTHUMG00000015320 | OTTHUMT00000041713  | chr6:108551530-108587289 | + | 3332 |
| OTTHUMG00000015322 | OTTHUMT00000041716  | chr6:108703539-108704443 | + | 630  |
| OTTHUMG00000015330 | OTTHUMT000000317438 | chr6:109179550-109196352 | + | 1782 |
| OTTHUMG00000015330 | OTTHUMT000000317437 | chr6:109179550-109197014 | + | 591  |
| OTTHUMG00000015330 | OTTHUMT000000317439 | chr6:109179552-109197838 | + | 1746 |
| OTTHUMG00000015330 | OTTHUMT000000317440 | chr6:109179714-109196352 | + | 597  |
| OTTHUMG00000015330 | OTTHUMT000000317441 | chr6:109187057-109197014 | + | 595  |
| OTTHUMG00000015330 | OTTHUMT000000317442 | chr6:109187061-109197014 | + | 1113 |
| OTTHUMG00000015330 | OTTHUMT00000041725  | chr6:109187357-109196901 | + | 324  |
| OTTHUMG00000015353 | OTTHUMT00000041773  | chr6:110254418-110256681 | + | 463  |
| OTTHUMG00000015374 | OTTHUMT00000041829  | chr6:111705828-111706638 | + | 555  |
| OTTHUMG00000015381 | OTTHUMT00000041866  | chr6:112328385-112329747 | + | 760  |
| OTTHUMG00000015393 | OTTHUMT00000041888  | chr6:112904433-112909531 | - | 486  |
| OTTHUMG00000015398 | OTTHUMT00000041893  | chr6:113784898-113795839 | - | 504  |
| OTTHUMG00000015399 | OTTHUMT00000041895  | chr6:113856435-113861316 | - | 522  |
| OTTHUMG00000015399 | OTTHUMT00000041894  | chr6:113856446-113860536 | - | 509  |
| OTTHUMG00000015400 | OTTHUMT00000041896  | chr6:113959013-113971688 | + | 594  |
| OTTHUMG00000015401 | OTTHUMT00000041897  | chr6:114051430-114077969 | - | 324  |
| OTTHUMG00000015401 | OTTHUMT00000041898  | chr6:114051674-114060409 | - | 462  |
| OTTHUMG00000015403 | OTTHUMT00000041900  | chr6:114219725-114265249 | + | 373  |
| OTTHUMG00000015405 | OTTHUMT00000041902  | chr6:114297855-114298592 | - | 411  |
| OTTHUMG00000015409 | OTTHUMT00000041907  | chr6:114423826-114427655 | + | 352  |
| OTTHUMG00000015414 | OTTHUMT00000041913  | chr6:114543973-114560160 | + | 340  |
| OTTHUMG00000015415 | OTTHUMT00000041914  | chr6:114595334-114596297 | - | 287  |
| OTTHUMG00000015417 | OTTHUMT00000041916  | chr6:114657998-114667056 | + | 556  |
| OTTHUMG00000015418 | OTTHUMT00000041917  | chr6:114905207-114916538 | - | 249  |
| OTTHUMG00000015418 | OTTHUMT00000041918  | chr6:114909282-114916609 | - | 784  |

|                    |                     |                          |   |      |
|--------------------|---------------------|--------------------------|---|------|
| OTTHUMG00000015419 | OTTHUMT00000041919  | chr6:114951308-114963732 | - | 400  |
| OTTHUMG00000015421 | OTTHUMT00000041921  | chr6:116061399-116062048 | - | 281  |
| OTTHUMG00000015478 | OTTHUMT00000042022  | chr6:121752735-121753726 | + | 268  |
| OTTHUMG00000015493 | OTTHUMT00000042044  | chr6:123433143-123435761 | + | 2618 |
| OTTHUMG00000015494 | OTTHUMT00000042045  | chr6:123434015-123434763 | + | 658  |
| OTTHUMG00000015507 | OTTHUMT00000042070  | chr6:125733056-125737169 | - | 818  |
| OTTHUMG00000015508 | OTTHUMT00000042071  | chr6:125788472-125808028 | - | 278  |
| OTTHUMG00000015509 | OTTHUMT00000042072  | chr6:126037198-126080937 | + | 839  |
| OTTHUMG00000015516 | OTTHUMT00000042102  | chr6:126540032-126565078 | + | 579  |
| OTTHUMG00000015548 | OTTHUMT00000042188  | chr6:129889464-129915425 | - | 721  |
| OTTHUMG00000015548 | OTTHUMT00000042189  | chr6:129902186-129909466 | - | 355  |
| OTTHUMG00000015558 | OTTHUMT00000042202  | chr6:131060150-131060616 | + | 333  |
| OTTHUMG00000055854 | OTTHUMT000000125838 | chr6:132264796-132283398 | + | 2303 |
| OTTHUMG00000055854 | OTTHUMT000000316059 | chr6:132264797-132270363 | + | 598  |
| OTTHUMG00000055854 | OTTHUMT000000316060 | chr6:132266481-132270363 | + | 710  |
| OTTHUMG00000055852 | OTTHUMT000000316065 | chr6:132447917-132462112 | + | 550  |
| OTTHUMG00000055852 | OTTHUMT000000125834 | chr6:132453366-132462059 | + | 488  |
| OTTHUMG00000015574 | OTTHUMT000000316061 | chr6:132494748-132499766 | + | 1827 |
| OTTHUMG00000015574 | OTTHUMT00000042240  | chr6:132496811-132509891 | + | 1343 |
| OTTHUMG00000015574 | OTTHUMT00000042241  | chr6:132497244-132532207 | + | 566  |
| OTTHUMG00000015574 | OTTHUMT00000042242  | chr6:132523597-132532194 | + | 510  |
| OTTHUMG00000015574 | OTTHUMT00000042243  | chr6:132523598-132527324 | + | 743  |
| OTTHUMG00000015607 | OTTHUMT00000042291  | chr6:134123016-134208782 | - | 241  |
| OTTHUMG00000015606 | OTTHUMT00000042289  | chr6:134183978-134214119 | + | 810  |
| OTTHUMG00000015606 | OTTHUMT00000042290  | chr6:134200015-134214631 | + | 772  |
| OTTHUMG00000015618 | OTTHUMT00000042327  | chr6:134969130-134972268 | - | 477  |
| OTTHUMG00000015619 | OTTHUMT00000042328  | chr6:134999320-135005326 | + | 367  |
| OTTHUMG00000015621 | OTTHUMT00000042332  | chr6:135068891-135070180 | - | 927  |
| OTTHUMG00000015628 | OTTHUMT00000042346  | chr6:135622827-135623764 | + | 214  |
| OTTHUMG00000015634 | OTTHUMT00000042362  | chr6:135992236-135993099 | - | 529  |
| OTTHUMG00000015637 | OTTHUMT00000042366  | chr6:136169979-136171297 | - | 775  |
| OTTHUMG00000015652 | OTTHUMT00000042390  | chr6:137344995-137356064 | - | 1354 |
| OTTHUMG00000015652 | OTTHUMT00000042391  | chr6:137344995-137356064 | - | 1346 |
| OTTHUMG00000015659 | OTTHUMT00000042407  | chr6:138036290-138037384 | + | 520  |
| OTTHUMG00000015661 | OTTHUMT00000042409  | chr6:138093000-138101813 | - | 734  |
| OTTHUMG00000015661 | OTTHUMT00000042410  | chr6:138093000-138101813 | - | 701  |
| OTTHUMG00000015662 | OTTHUMT00000042411  | chr6:138186503-138188724 | - | 1023 |
| OTTHUMG00000015665 | OTTHUMT00000042419  | chr6:138305909-138308632 | - | 571  |
| OTTHUMG00000015667 | OTTHUMT00000042422  | chr6:138308196-138314404 | + | 533  |
| OTTHUMG00000015667 | OTTHUMT00000042421  | chr6:138308196-138335352 | + | 379  |
| OTTHUMG00000015690 | OTTHUMT00000042462  | chr6:139670512-139671052 | - | 489  |
| OTTHUMG00000015693 | OTTHUMT00000042465  | chr6:139832994-139835885 | - | 487  |
| OTTHUMG00000015697 | OTTHUMT00000042470  | chr6:140217680-140222638 | + | 705  |
| OTTHUMG00000015697 | OTTHUMT00000042469  | chr6:140217749-140222981 | + | 953  |
| OTTHUMG00000015698 | OTTHUMT00000042471  | chr6:140218934-140240221 | - | 784  |

|                     |                     |                          |   |      |
|---------------------|---------------------|--------------------------|---|------|
| OTTHUMG00000015699  | OTTHUMT00000042472  | chr6:140430265-140456551 | + | 1249 |
| OTTHUMG00000015699  | OTTHUMT00000042473  | chr6:140445925-140451260 | + | 873  |
| OTTHUMG00000015699  | OTTHUMT00000042474  | chr6:140449512-140456495 | + | 753  |
| OTTHUMG00000015700  | OTTHUMT00000042475  | chr6:141208788-141215754 | - | 451  |
| OTTHUMG00000015706  | OTTHUMT00000042482  | chr6:142495920-142497981 | + | 910  |
| OTTHUMG00000015708  | OTTHUMT00000042486  | chr6:142614677-142622462 | - | 347  |
| OTTHUMG00000015712  | OTTHUMT00000042494  | chr6:142889285-143000719 | - | 2290 |
| OTTHUMG00000015716  | OTTHUMT00000042500  | chr6:143313041-143319476 | + | 551  |
| OTTHUMG00000015718  | OTTHUMT00000042502  | chr6:143329254-143400412 | - | 1897 |
| OTTHUMG00000015718  | OTTHUMT00000042503  | chr6:143329863-143384783 | - | 780  |
| OTTHUMG00000015720  | OTTHUMT00000042505  | chr6:143402255-143405154 | - | 550  |
| OTTHUMG00000015760  | OTTHUMT00000042589  | chr6:147222010-147225910 | + | 452  |
| OTTHUMG00000015761  | OTTHUMT00000042590  | chr6:147521754-147543821 | + | 450  |
| OTTHUMG00000015764  | OTTHUMT00000042603  | chr6:147750493-147753294 | + | 1475 |
| OTTHUMG00000015769  | OTTHUMT00000042615  | chr6:148023532-148316766 | + | 770  |
| OTTHUMG00000015769  | OTTHUMT00000042612  | chr6:148023566-148100385 | + | 403  |
| OTTHUMG00000015769  | OTTHUMT00000042613  | chr6:148038904-148100385 | + | 401  |
| OTTHUMG00000015769  | OTTHUMT00000042614  | chr6:148055227-148100385 | + | 410  |
| OTTHUMG00000015768  | OTTHUMT00000042611  | chr6:148104263-148106153 | - | 601  |
| OTTHUMG00000015770  | OTTHUMT00000042616  | chr6:148380251-148383803 | - | 443  |
| OTTHUMG00000015771  | OTTHUMT00000042617  | chr6:148496638-148500233 | - | 424  |
| OTTHUMG00000015782  | OTTHUMT00000042631  | chr6:149580755-149584116 | + | 796  |
| OTTHUMG00000015782  | OTTHUMT00000042630  | chr6:149580830-149592988 | + | 463  |
| OTTHUMG00000015782  | OTTHUMT00000042632  | chr6:149581527-149606901 | + | 421  |
| OTTHUMG00000015781  | OTTHUMT00000042629  | chr6:149606128-149606830 | - | 560  |
| OTTHUMG00000015791  | OTTHUMT00000042647  | chr6:149923981-149926778 | + | 376  |
| OTTHUMG00000015830  | OTTHUMT00000042709  | chr6:151559509-151560466 | - | 802  |
| OTTHUMG00000015852  | OTTHUMT00000042754  | chr6:153157324-153194741 | - | 439  |
| OTTHUMG00000015852  | OTTHUMT00000042755  | chr6:153167581-153167956 | - | 242  |
| OTTHUMG00000015860  | OTTHUMT00000042775  | chr6:153667423-153671810 | - | 435  |
| OTTHUMG00000015884  | OTTHUMT00000042820  | chr6:155743337-155744009 | - | 552  |
| OTTHUMG00000015885  | OTTHUMT00000042822  | chr6:156856052-156862597 | - | 530  |
| OTTHUMG00000015885  | OTTHUMT00000042821  | chr6:156860572-156861792 | - | 398  |
| OTTHUMG00000015922  | OTTHUMT00000042889  | chr6:159405748-159406293 | - | 329  |
| OTTHUMG00000015925  | OTTHUMT00000042895  | chr6:159448811-159457073 | + | 841  |
| OTTHUMG00000015926  | OTTHUMT00000042896  | chr6:159506929-159508373 | + | 383  |
| OTTHUMG00000015930  | OTTHUMT00000042902  | chr6:159694944-159695695 | - | 418  |
| OTTHUMG00000015931  | OTTHUMT00000042903  | chr6:159724553-159737465 | + | 769  |
| OTTHUMG000000141283 | OTTHUMT000000280510 | chr6:159927977-159930191 | - | 2000 |
| OTTHUMG00000015939  | OTTHUMT00000042920  | chr6:159980329-159981123 | - | 739  |
| OTTHUMG00000015943  | OTTHUMT00000042929  | chr6:160240208-160243532 | + | 593  |
| OTTHUMG00000015949  | OTTHUMT00000042942  | chr6:160613639-160617152 | + | 465  |
| OTTHUMG00000015954  | OTTHUMT00000042954  | chr6:161039310-161041654 | + | 290  |
| OTTHUMG00000015954  | OTTHUMT00000042955  | chr6:161039515-161041654 | + | 120  |
| OTTHUMG00000015958  | OTTHUMT00000042967  | chr6:161156572-161158373 | - | 1187 |

|                     |                     |                          |   |      |
|---------------------|---------------------|--------------------------|---|------|
| OTTHUMG00000015961  | OTTHUMT00000042973  | chr6:161267391-161268184 | + | 377  |
| OTTHUMG00000015962  | OTTHUMT00000042974  | chr6:161272102-161310793 | + | 569  |
| OTTHUMG00000015978  | OTTHUMT00000043019  | chr6:163927605-163929187 | + | 598  |
| OTTHUMG00000015979  | OTTHUMT00000043020  | chr6:164044926-164100863 | + | 717  |
| OTTHUMG00000015980  | OTTHUMT00000043021  | chr6:164449642-164450716 | - | 446  |
| OTTHUMG00000015981  | OTTHUMT00000043022  | chr6:164687512-164689667 | - | 464  |
| OTTHUMG00000015982  | OTTHUMT00000043023  | chr6:165161229-165163096 | + | 309  |
| OTTHUMG00000015988  | OTTHUMT00000043033  | chr6:166087667-166109258 | + | 1120 |
| OTTHUMG00000015989  | OTTHUMT00000043034  | chr6:166106679-166108664 | - | 357  |
| OTTHUMG00000015993  | OTTHUMT00000043040  | chr6:166433143-166446751 | + | 1032 |
| OTTHUMG00000016006  | OTTHUMT00000043074  | chr6:167237176-167238313 | + | 625  |
| OTTHUMG00000016020  | OTTHUMT00000043124  | chr6:167570986-167573958 | - | 577  |
| OTTHUMG00000016019  | OTTHUMT00000043123  | chr6:167575369-167579394 | + | 203  |
| OTTHUMG00000016038  | OTTHUMT00000043184  | chr6:168120111-168121902 | - | 273  |
| OTTHUMG00000016040  | OTTHUMT00000043187  | chr6:168337887-168348030 | + | 447  |
| OTTHUMG00000016041  | OTTHUMT00000043188  | chr6:168368808-168370046 | - | 453  |
| OTTHUMG00000016042  | OTTHUMT00000043189  | chr6:168373261-168384244 | + | 470  |
| OTTHUMG00000016043  | OTTHUMT00000043190  | chr6:168386467-168406110 | + | 2241 |
| OTTHUMG00000016045  | OTTHUMT00000043192  | chr6:168443712-168445643 | - | 443  |
| OTTHUMG00000016049  | OTTHUMT00000043200  | chr6:168858670-168865529 | + | 554  |
| OTTHUMG00000016053  | OTTHUMT00000043209  | chr6:169104630-169106361 | - | 912  |
| OTTHUMG00000016052  | OTTHUMT00000043208  | chr6:169176217-169177662 | - | 932  |
| OTTHUMG00000016051  | OTTHUMT00000043206  | chr6:169209838-169211436 | + | 391  |
| OTTHUMG00000016051  | OTTHUMT00000043207  | chr6:169209919-169211444 | + | 302  |
| OTTHUMG00000016054  | OTTHUMT00000043210  | chr6:169300112-169304944 | - | 645  |
| OTTHUMG00000016054  | OTTHUMT000000105434 | chr6:169300281-169304321 | - | 599  |
| OTTHUMG00000045406  | OTTHUMT000000105437 | chr6:169428554-169429496 | - | 652  |
| OTTHUMG00000045406  | OTTHUMT000000105436 | chr6:169428554-169431236 | - | 476  |
| OTTHUMG00000016055  | OTTHUMT00000043212  | chr6:169512018-169530405 | - | 586  |
| OTTHUMG00000016055  | OTTHUMT00000043211  | chr6:169515701-169530405 | - | 2280 |
| OTTHUMG00000016062  | OTTHUMT00000043229  | chr6:169867112-169867875 | - | 400  |
| OTTHUMG00000016063  | OTTHUMT00000043230  | chr6:169867525-169881013 | + | 333  |
| OTTHUMG00000016072  | OTTHUMT00000043247  | chr6:169951339-169952123 | - | 692  |
| OTTHUMG00000016073  | OTTHUMT00000043248  | chr6:170319666-170320176 | + | 427  |
| OTTHUMG00000016075  | OTTHUMT00000043250  | chr6:170405347-170413582 | - | 1327 |
| OTTHUMG00000016077  | OTTHUMT00000043253  | chr6:170426387-170430482 | + | 316  |
| OTTHUMG00000016077  | OTTHUMT00000043252  | chr6:170427952-170430482 | + | 344  |
| OTTHUMG00000016088  | OTTHUMT00000043280  | chr6:170846326-170847963 | + | 803  |
| OTTHUMG00000016089  | OTTHUMT00000043281  | chr6:170876210-170879501 | + | 756  |
| OTTHUMG00000016090  | OTTHUMT00000043282  | chr6:170886764-170887558 | + | 331  |
| OTTHUMG00000016092  | OTTHUMT00000043284  | chr6:170887186-170888790 | - | 436  |
| OTTHUMG000000151399 | OTTHUMT000000322474 | chr7:36367-54637         | - | 676  |
| OTTHUMG000000151399 | OTTHUMT000000322473 | chr7:45934-59133         | - | 931  |
| OTTHUMG000000151404 | OTTHUMT000000322487 | chr7:84840-93617         | - | 347  |
| OTTHUMG000000151404 | OTTHUMT000000322486 | chr7:87617-93849         | - | 645  |

|                    |                    |                        |   |      |
|--------------------|--------------------|------------------------|---|------|
| OTTHUMG00000151404 | OTTHUMT00000322484 | chr7:87699-98231       | - | 428  |
| OTTHUMG00000151396 | OTTHUMT00000322467 | chr7:89518-90597       | + | 455  |
| OTTHUMG00000151404 | OTTHUMT00000322481 | chr7:93442-130563      | - | 1895 |
| OTTHUMG00000151404 | OTTHUMT00000322483 | chr7:93609-102930      | - | 487  |
| OTTHUMG00000151404 | OTTHUMT00000322485 | chr7:97102-98194       | - | 361  |
| OTTHUMG00000151404 | OTTHUMT00000322482 | chr7:112690-130529     | - | 1001 |
| OTTHUMG00000151403 | OTTHUMT00000322480 | chr7:166055-166918     | - | 757  |
| OTTHUMG00000151400 | OTTHUMT00000322475 | chr7:172121-175501     | + | 603  |
| OTTHUMG00000151405 | OTTHUMT00000322488 | chr7:230936-244445     | - | 658  |
| OTTHUMG00000151405 | OTTHUMT00000322489 | chr7:239527-240513     | - | 503  |
| OTTHUMG00000151405 | OTTHUMT00000322490 | chr7:243411-244549     | - | 427  |
| OTTHUMG00000151405 | OTTHUMT00000322491 | chr7:243412-244521     | - | 494  |
| OTTHUMG00000151398 | OTTHUMT00000322469 | chr7:244680-250548     | + | 5006 |
| OTTHUMG00000151398 | OTTHUMT00000322470 | chr7:244814-248573     | + | 588  |
| OTTHUMG00000151398 | OTTHUMT00000322471 | chr7:244861-249021     | + | 883  |
| OTTHUMG00000151398 | OTTHUMT00000322472 | chr7:247762-248906     | + | 551  |
| OTTHUMG00000151402 | OTTHUMT00000322479 | chr7:270003-271096     | + | 565  |
| OTTHUMG00000151413 | OTTHUMT00000322539 | chr7:490270-502281     | - | 417  |
| OTTHUMG00000152023 | OTTHUMT00000324911 | chr7:1273515-1275429   | + | 431  |
| OTTHUMG00000151728 | OTTHUMT00000323690 | chr7:1514817-1515589   | - | 240  |
| OTTHUMG00000151498 | OTTHUMT00000322898 | chr7:1626816-1627567   | + | 435  |
| OTTHUMG00000151495 | OTTHUMT00000322893 | chr7:1715250-1751313   | + | 1011 |
| OTTHUMG00000151496 | OTTHUMT00000322894 | chr7:1744792-1748434   | - | 635  |
| OTTHUMG00000151496 | OTTHUMT00000322895 | chr7:1745145-1748453   | - | 634  |
| OTTHUMG00000151516 | OTTHUMT00000322975 | chr7:2390282-2394758   | + | 606  |
| OTTHUMG00000152044 | OTTHUMT00000325029 | chr7:2443924-2454011   | + | 2065 |
| OTTHUMG00000152108 | OTTHUMT00000325234 | chr7:2723993-2729148   | - | 3286 |
| OTTHUMG00000152116 | OTTHUMT00000325282 | chr7:3089412-3092581   | - | 435  |
| OTTHUMG00000151735 | OTTHUMT00000323712 | chr7:3202784-3204414   | - | 415  |
| OTTHUMG00000151887 | OTTHUMT00000324257 | chr7:6087260-6091413   | + | 521  |
| OTTHUMG00000151887 | OTTHUMT00000324256 | chr7:6087260-6099209   | + | 543  |
| OTTHUMG00000151887 | OTTHUMT00000324258 | chr7:6087828-6099242   | + | 536  |
| OTTHUMG00000151853 | OTTHUMT00000324169 | chr7:6621773-6627705   | + | 1113 |
| OTTHUMG00000152026 | OTTHUMT00000324926 | chr7:7956009-7956865   | - | 690  |
| OTTHUMG00000151925 | OTTHUMT00000324434 | chr7:9743476-9775667   | + | 613  |
| OTTHUMG00000151921 | OTTHUMT00000324427 | chr7:9967176-9987969   | + | 358  |
| OTTHUMG00000151923 | OTTHUMT00000324429 | chr7:10708828-10713558 | + | 447  |
| OTTHUMG00000152349 | OTTHUMT00000325955 | chr7:13107541-13108539 | + | 573  |
| OTTHUMG00000152349 | OTTHUMT00000326010 | chr7:13107622-13710299 | + | 521  |
| OTTHUMG00000152350 | OTTHUMT00000325956 | chr7:13345351-13371199 | - | 837  |
| OTTHUMG00000152366 | OTTHUMT00000326000 | chr7:13860505-13865175 | - | 357  |
| OTTHUMG00000152389 | OTTHUMT00000326054 | chr7:15072357-15074801 | + | 651  |
| OTTHUMG00000152388 | OTTHUMT00000326053 | chr7:15694528-15701641 | + | 695  |
| OTTHUMG00000152392 | OTTHUMT00000326060 | chr7:15695225-15697004 | - | 310  |
| OTTHUMG00000152394 | OTTHUMT00000326062 | chr7:15847447-15848510 | - | 326  |

|                    |                    |                          |   |      |
|--------------------|--------------------|--------------------------|---|------|
| OTTHUMG00000152729 | OTTHUMT00000327606 | chr7:17381016-17472813   | + | 833  |
| OTTHUMG00000152727 | OTTHUMT00000327603 | chr7:17440626-17466821   | - | 584  |
| OTTHUMG00000152727 | OTTHUMT00000327604 | chr7:17442179-17463585   | - | 385  |
| OTTHUMG00000152731 | OTTHUMT00000327610 | chr7:17469594-17565058   | - | 438  |
| OTTHUMG00000152728 | OTTHUMT00000327605 | chr7:17685698-17686808   | + | 271  |
| OTTHUMG00000152496 | OTTHUMT00000326462 | chr7:19118622-19120419   | + | 1709 |
| OTTHUMG00000152498 | OTTHUMT00000326466 | chr7:19126081-19128064   | + | 690  |
| OTTHUMG00000152489 | OTTHUMT00000326428 | chr7:19359682-19584754   | + | 560  |
| OTTHUMG00000152511 | OTTHUMT00000326541 | chr7:19819833-19837564   | - | 648  |
| OTTHUMG00000152502 | OTTHUMT00000326472 | chr7:20302856-20317860   | + | 1119 |
| OTTHUMG00000152502 | OTTHUMT00000326474 | chr7:20304442-20306773   | + | 373  |
| OTTHUMG00000152502 | OTTHUMT00000326473 | chr7:20311859-20317860   | + | 989  |
| OTTHUMG00000152530 | OTTHUMT00000326621 | chr7:22569481-22580140   | + | 2428 |
| OTTHUMG00000152532 | OTTHUMT00000326623 | chr7:22577751-22667936   | - | 1280 |
| OTTHUMG00000152531 | OTTHUMT00000326622 | chr7:22595849-22597766   | + | 555  |
| OTTHUMG00000150712 | OTTHUMT00000319722 | chr7:22656104-22671677   | - | 2587 |
| OTTHUMG00000152653 | OTTHUMT00000327184 | chr7:23212157-23214189   | + | 1997 |
| OTTHUMG00000152567 | OTTHUMT00000326774 | chr7:24202806-24261863   | - | 525  |
| OTTHUMG00000152596 | OTTHUMT00000326928 | chr7:25327446-25332959   | - | 359  |
| OTTHUMG00000152593 | OTTHUMT00000326921 | chr7:25553907-25557207   | - | 207  |
| OTTHUMG00000152862 | OTTHUMT00000328277 | chr7:26557966-26563344   | + | 2779 |
| OTTHUMG00000152862 | OTTHUMT00000328279 | chr7:26557983-26561258   | + | 573  |
| OTTHUMG00000152862 | OTTHUMT00000328278 | chr7:26558040-26561420   | + | 568  |
| OTTHUMG00000150031 | OTTHUMT00000315832 | chr7:27192717-27199592   | - | 554  |
| OTTHUMG00000065280 | OTTHUMT00000317667 | chr7:27208165-27213378   | + | 2601 |
| OTTHUMG00000065280 | OTTHUMT00000140062 | chr7:27208174-27213403   | + | 3155 |
| OTTHUMG00000065292 | OTTHUMT00000140107 | chr7:27245387-27247372   | - | 755  |
| OTTHUMG00000133703 | OTTHUMT00000257963 | chr7:27367987-27416082   | + | 562  |
| OTTHUMG00000065294 | OTTHUMT00000140109 | chr7:27386706-27387350   | + | 644  |
| OTTHUMG00000064693 | OTTHUMT00000139052 | chr7:27418308-27419035   | + | 727  |
| OTTHUMG00000152858 | OTTHUMT00000328270 | chr7:28993169-28995040   | + | 576  |
| OTTHUMG00000152754 | OTTHUMT00000327682 | chr7:29642552-29644065   | + | 804  |
| OTTHUMG00000152762 | OTTHUMT00000327706 | chr7:30182528-30185155   | - | 672  |
| OTTHUMG00000152789 | OTTHUMT00000327891 | chr7:30590841-30592113   | - | 750  |
| OTTHUMG00000152878 | OTTHUMT00000328336 | chr7:31420784-31427425   | - | 571  |
| OTTHUMG00000153006 | OTTHUMT00000328965 | chr7:34215663-34262480   | + | 508  |
| OTTHUMG00000063284 | OTTHUMT00000137349 | chr7:89779746-89789842   | + | 730  |
| OTTHUMG00000133696 | OTTHUMT00000257953 | chr7:114488827-114658645 | - | 559  |
| OTTHUMG00000065346 | OTTHUMT00000140193 | chr7:114506248-114553604 | + | 1183 |
| OTTHUMG00000065346 | OTTHUMT00000140192 | chr7:114506288-114553081 | + | 741  |
| OTTHUMG00000066051 | OTTHUMT00000141445 | chr7:115702896-115713954 | - | 1955 |
| OTTHUMG00000066048 | OTTHUMT00000141439 | chr7:115990884-115998524 | - | 690  |
| OTTHUMG00000064097 | OTTHUMT00000138331 | chr7:115998250-116001034 | - | 467  |
| OTTHUMG00000064097 | OTTHUMT00000315762 | chr7:115998442-116041973 | - | 465  |
| OTTHUMG00000064097 | OTTHUMT00000316598 | chr7:116000775-116042110 | - | 623  |

|                    |                    |                          |   |      |
|--------------------|--------------------|--------------------------|---|------|
| OTTHUMG00000150172 | OTTHUMT00000316690 | chr7:117426148-117431335 | - | 432  |
| OTTHUMG00000066283 | OTTHUMT00000141830 | chr7:126777123-126777583 | - | 460  |
| OTTHUMG00000148663 | OTTHUMT00000308984 | chr7:126777418-126778813 | + | 514  |
| OTTHUMG00000066284 | OTTHUMT00000141831 | chr7:126787075-126792049 | - | 4974 |
| OTTHUMG00000064344 | OTTHUMT00000138623 | chr7:126904173-126913094 | + | 953  |
| OTTHUMG00000043895 | OTTHUMT00000102291 | chr7:130216291-130248609 | - | 2224 |
| OTTHUMG00000152719 | OTTHUMT00000327545 | chr7:145003908-145009395 | - | 670  |
| OTTHUMG00000151503 | OTTHUMT00000322914 | chr7:148726228-148729480 | + | 3118 |
| OTTHUMG00000151464 | OTTHUMT00000322756 | chr7:152727938-152740252 | - | 1003 |
| OTTHUMG00000151464 | OTTHUMT00000322755 | chr7:152733511-152741954 | - | 428  |
| OTTHUMG00000151464 | OTTHUMT00000280517 | chr7:152739252-152741981 | - | 2622 |
| OTTHUMG00000151323 | OTTHUMT00000322232 | chr7:154626790-154627832 | + | 365  |
| OTTHUMG00000151328 | OTTHUMT00000322242 | chr7:154689942-154690695 | + | 453  |
| OTTHUMG00000151348 | OTTHUMT00000322326 | chr7:154906662-154942555 | - | 531  |
| OTTHUMG00000151447 | OTTHUMT00000322680 | chr7:155917978-155921288 | - | 430  |
| OTTHUMG00000151444 | OTTHUMT00000322673 | chr7:155923244-155931043 | - | 2695 |
| OTTHUMG00000152642 | OTTHUMT00000327102 | chr7:156951686-156985171 | + | 4045 |
| OTTHUMG00000152645 | OTTHUMT00000327108 | chr7:156986777-156989032 | + | 543  |
| OTTHUMG00000152640 | OTTHUMT00000327100 | chr7:156998749-157002296 | + | 289  |
| OTTHUMG00000152648 | OTTHUMT00000327123 | chr7:158076082-158076573 | + | 392  |
| OTTHUMG00000141277 | OTTHUMT00000280498 | chr8:49665514-49669734   | + | 3547 |
| OTTHUMG00000019423 | OTTHUMT00000051453 | chr9:62701-78826         | + | 391  |
| OTTHUMG00000019423 | OTTHUMT00000051452 | chr9:62706-65298         | + | 526  |
| OTTHUMG00000019423 | OTTHUMT00000051454 | chr9:62716-65298         | + | 572  |
| OTTHUMG00000021018 | OTTHUMT00000055437 | chr9:90804-92850         | - | 610  |
| OTTHUMG00000021018 | OTTHUMT00000055438 | chr9:91002-92941         | - | 571  |
| OTTHUMG00000019424 | OTTHUMT00000051455 | chr9:102716-103754       | - | 411  |
| OTTHUMG00000019439 | OTTHUMT00000051497 | chr9:1031219-1032520     | - | 778  |
| OTTHUMG00000019446 | OTTHUMT00000051518 | chr9:2531097-2531635     | + | 204  |
| OTTHUMG00000019454 | OTTHUMT00000051538 | chr9:3171589-3188517     | + | 882  |
| OTTHUMG00000019458 | OTTHUMT00000051552 | chr9:3637335-3638338     | + | 726  |
| OTTHUMG00000019459 | OTTHUMT00000051553 | chr9:3664546-3681814     | + | 534  |
| OTTHUMG00000019460 | OTTHUMT00000051554 | chr9:3674076-3679626     | - | 674  |
| OTTHUMG00000019514 | OTTHUMT00000051653 | chr9:6037360-6056714     | + | 497  |
| OTTHUMG00000019527 | OTTHUMT00000051681 | chr9:6694471-6697780     | + | 420  |
| OTTHUMG00000019530 | OTTHUMT00000051684 | chr9:6706548-6713630     | + | 1496 |
| OTTHUMG00000019530 | OTTHUMT00000051686 | chr9:6708810-6709370     | + | 470  |
| OTTHUMG00000019530 | OTTHUMT00000051685 | chr9:6709068-6717438     | + | 828  |
| OTTHUMG00000019540 | OTTHUMT00000051706 | chr9:7920827-7925137     | - | 193  |
| OTTHUMG00000046176 | OTTHUMT00000106442 | chr9:7950413-7951080     | - | 499  |
| OTTHUMG00000019550 | OTTHUMT00000051723 | chr9:10621750-10622203   | - | 155  |
| OTTHUMG00000019554 | OTTHUMT00000051727 | chr9:11265314-11266314   | - | 283  |
| OTTHUMG00000019555 | OTTHUMT00000051728 | chr9:12088660-12149147   | - | 557  |
| OTTHUMG00000019563 | OTTHUMT00000051737 | chr9:13436525-13477510   | + | 475  |
| OTTHUMG00000019566 | OTTHUMT00000051740 | chr9:14015970-14020114   | + | 433  |

|                    |                    |                        |   |      |
|--------------------|--------------------|------------------------|---|------|
| OTTHUMG00000019570 | OTTHUMT00000051744 | chr9:14307084-14347853 | + | 962  |
| OTTHUMG00000019570 | OTTHUMT00000051745 | chr9:14337319-14347907 | + | 791  |
| OTTHUMG00000019587 | OTTHUMT00000051772 | chr9:16111131-16112432 | + | 310  |
| OTTHUMG00000019602 | OTTHUMT00000051798 | chr9:18350595-18352218 | - | 235  |
| OTTHUMG00000019689 | OTTHUMT00000051925 | chr9:22103677-22110837 | + | 665  |
| OTTHUMG00000019689 | OTTHUMT00000051926 | chr9:22108643-22110712 | + | 542  |
| OTTHUMG00000019692 | OTTHUMT00000051934 | chr9:22193989-22204671 | - | 439  |
| OTTHUMG00000019695 | OTTHUMT00000051937 | chr9:22757174-22758315 | + | 445  |
| OTTHUMG00000019699 | OTTHUMT00000051942 | chr9:23661786-23662397 | - | 235  |
| OTTHUMG00000019702 | OTTHUMT00000051950 | chr9:23819671-23839912 | + | 1422 |
| OTTHUMG00000019703 | OTTHUMT00000051951 | chr9:23884988-23888054 | - | 687  |
| OTTHUMG00000019705 | OTTHUMT00000051953 | chr9:25770054-25774560 | + | 460  |
| OTTHUMG00000019711 | OTTHUMT00000051963 | chr9:27235682-27272791 | - | 2896 |
| OTTHUMG00000019749 | OTTHUMT00000052014 | chr9:32633101-32635024 | - | 837  |
| OTTHUMG00000000399 | OTTHUMT00000001034 | chr9:33502957-33504771 | - | 392  |
| OTTHUMG00000000405 | OTTHUMT00000001042 | chr9:33592499-33595291 | + | 897  |
| OTTHUMG00000000405 | OTTHUMT00000001041 | chr9:33594295-33595279 | + | 543  |
| OTTHUMG00000000412 | OTTHUMT00000001049 | chr9:33709688-33712553 | + | 1142 |
| OTTHUMG00000000413 | OTTHUMT00000001050 | chr9:33722973-33728414 | - | 484  |
| OTTHUMG00000000413 | OTTHUMT00000001051 | chr9:33722973-33728414 | - | 397  |
| OTTHUMG00000000449 | OTTHUMT00000001153 | chr9:34654780-34655976 | - | 832  |
| OTTHUMG00000000449 | OTTHUMT00000001151 | chr9:34655025-34656025 | - | 462  |
| OTTHUMG00000000449 | OTTHUMT00000001152 | chr9:34655025-34656109 | - | 474  |
| OTTHUMG00000000451 | OTTHUMT00000001163 | chr9:34655662-34671295 | + | 662  |
| OTTHUMG00000000448 | OTTHUMT00000001150 | chr9:34716543-34719451 | - | 717  |
| OTTHUMG00000019865 | OTTHUMT00000052320 | chr9:35632511-35633514 | + | 677  |
| OTTHUMG00000019866 | OTTHUMT00000052321 | chr9:35636267-35637096 | + | 572  |
| OTTHUMG00000019884 | OTTHUMT00000052387 | chr9:35776643-35780429 | + | 405  |
| OTTHUMG00000019888 | OTTHUMT00000052397 | chr9:35920009-35927148 | + | 354  |
| OTTHUMG00000019903 | OTTHUMT00000052420 | chr9:36297039-36305276 | + | 502  |
| OTTHUMG00000019904 | OTTHUMT00000052421 | chr9:36322947-36324969 | - | 386  |
| OTTHUMG00000019909 | OTTHUMT00000052435 | chr9:37063528-37065789 | - | 945  |
| OTTHUMG00000019910 | OTTHUMT00000052436 | chr9:37069893-37080398 | + | 4373 |
| OTTHUMG00000019910 | OTTHUMT00000052437 | chr9:37069932-37076871 | + | 309  |
| OTTHUMG00000019911 | OTTHUMT00000052438 | chr9:37102915-37105487 | - | 942  |
| OTTHUMG00000019916 | OTTHUMT00000052460 | chr9:37373175-37374431 | - | 241  |
| OTTHUMG00000019939 | OTTHUMT00000052493 | chr9:38350424-38366427 | + | 665  |
| OTTHUMG00000019951 | OTTHUMT00000052508 | chr9:38838558-38841913 | + | 791  |
| OTTHUMG00000067122 | OTTHUMT00000143659 | chr9:39374503-39395302 | - | 473  |
| OTTHUMG00000067120 | OTTHUMT00000143657 | chr9:39385734-39387403 | - | 1075 |
| OTTHUMG00000067142 | OTTHUMT00000143679 | chr9:39915026-39916970 | - | 1123 |
| OTTHUMG00000067148 | OTTHUMT00000143686 | chr9:40730776-40732447 | - | 845  |
| OTTHUMG00000066730 | OTTHUMT00000143041 | chr9:41267733-41288538 | + | 473  |
| OTTHUMG00000066734 | OTTHUMT00000143045 | chr9:41275357-41277306 | + | 1124 |
| OTTHUMG00000058151 | OTTHUMT00000128845 | chr9:41506046-41513018 | + | 1716 |



|                    |                     |                        |   |      |
|--------------------|---------------------|------------------------|---|------|
| OTTHUMG00000058154 | OTTHUMT00000128848  | chr9:41519583-41540387 | - | 479  |
| OTTHUMG00000066715 | OTTHUMT00000143026  | chr9:42353044-42357088 | - | 3198 |
| OTTHUMG00000013274 | OTTHUMT00000037045  | chr9:43130533-43132735 | - | 380  |
| OTTHUMG00000013273 | OTTHUMT00000037044  | chr9:43134976-43150004 | - | 954  |
| OTTHUMG00000013277 | OTTHUMT00000037052  | chr9:43174019-43179407 | - | 1756 |
| OTTHUMG00000067212 | OTTHUMT00000143910  | chr9:44324581-44331701 | + | 3611 |
| OTTHUMG00000067216 | OTTHUMT00000143914  | chr9:44763709-44775517 | + | 715  |
| OTTHUMG00000013244 | OTTHUMT00000037012  | chr9:44941903-44943113 | - | 437  |
| OTTHUMG00000013243 | OTTHUMT00000037011  | chr9:44944875-44963232 | + | 490  |
| OTTHUMG00000013242 | OTTHUMT00000037010  | chr9:44974953-44987141 | - | 715  |
| OTTHUMG00000013241 | OTTHUMT00000037007  | chr9:45048388-45052528 | + | 928  |
| OTTHUMG00000013241 | OTTHUMT00000037009  | chr9:45048417-45049827 | + | 577  |
| OTTHUMG00000013241 | OTTHUMT00000037008  | chr9:45048577-45052463 | + | 743  |
| OTTHUMG00000058669 | OTTHUMT00000129824  | chr9:45104574-45152497 | + | 888  |
| OTTHUMG00000013261 | OTTHUMT00000037029  | chr9:46160782-46164924 | - | 928  |
| OTTHUMG00000013261 | OTTHUMT00000037030  | chr9:46160847-46164895 | - | 1010 |
| OTTHUMG00000013262 | OTTHUMT00000037031  | chr9:46249238-46270253 | - | 526  |
| OTTHUMG00000013300 | OTTHUMT00000037086  | chr9:46501238-46502589 | - | 540  |
| OTTHUMG00000013300 | OTTHUMT00000037087  | chr9:46501440-46502833 | - | 493  |
| OTTHUMG00000067237 | OTTHUMT00000143935  | chr9:46538570-46545301 | - | 3220 |
| OTTHUMG00000058150 | OTTHUMT00000128844  | chr9:46666488-46673315 | + | 3318 |
| OTTHUMG00000013198 | OTTHUMT00000036955  | chr9:65207603-65208846 | + | 417  |
| OTTHUMG00000058153 | OTTHUMT00000128847  | chr9:65227093-65234068 | - | 1720 |
| OTTHUMG00000058153 | OTTHUMT000000313670 | chr9:65228116-65234060 | - | 772  |
| OTTHUMG00000067240 | OTTHUMT00000143938  | chr9:65620353-65623705 | - | 791  |
| OTTHUMG00000058148 | OTTHUMT00000128842  | chr9:67169627-67172979 | - | 790  |
| OTTHUMG00000058662 | OTTHUMT00000129817  | chr9:67887698-67891579 | - | 2815 |
| OTTHUMG00000019963 | OTTHUMT00000052545  | chr9:70033387-70034048 | + | 338  |
| OTTHUMG00000019960 | OTTHUMT00000052540  | chr9:70112129-70113181 | + | 414  |
| OTTHUMG00000019968 | OTTHUMT00000052552  | chr9:70348277-70350852 | - | 491  |
| OTTHUMG00000019968 | OTTHUMT00000052553  | chr9:70348277-70351325 | - | 334  |
| OTTHUMG00000019980 | OTTHUMT00000052579  | chr9:71232984-71233457 | - | 396  |
| OTTHUMG00000020009 | OTTHUMT00000052650  | chr9:74062072-74062519 | + | 359  |
| OTTHUMG00000020007 | OTTHUMT00000052642  | chr9:74110165-74120200 | + | 670  |
| OTTHUMG00000020007 | OTTHUMT00000052641  | chr9:74110172-74147946 | + | 2073 |
| OTTHUMG00000020007 | OTTHUMT00000052643  | chr9:74110253-74120200 | + | 586  |
| OTTHUMG00000020015 | OTTHUMT00000052661  | chr9:74676464-74678804 | - | 590  |
| OTTHUMG00000020015 | OTTHUMT00000052660  | chr9:74676464-74678834 | - | 624  |
| OTTHUMG00000020015 | OTTHUMT00000052662  | chr9:74676464-74678845 | - | 579  |
| OTTHUMG00000020021 | OTTHUMT00000052687  | chr9:75378351-75384234 | + | 621  |
| OTTHUMG00000020024 | OTTHUMT00000052690  | chr9:76176267-76188266 | + | 645  |
| OTTHUMG00000020036 | OTTHUMT00000052713  | chr9:77384405-77393284 | + | 456  |
| OTTHUMG00000020070 | OTTHUMT00000052782  | chr9:81310539-81337077 | - | 326  |
| OTTHUMG00000020070 | OTTHUMT00000052783  | chr9:81322608-81337077 | - | 700  |
| OTTHUMG00000020074 | OTTHUMT00000052798  | chr9:81679431-81691413 | - | 522  |

|                    |                     |                        |   |      |
|--------------------|---------------------|------------------------|---|------|
| OTTHUMG00000020075 | OTTHUMT00000052799  | chr9:81835314-81839290 | + | 444  |
| OTTHUMG00000020080 | OTTHUMT00000052804  | chr9:82674493-82676030 | - | 788  |
| OTTHUMG00000020094 | OTTHUMT00000052819  | chr9:84209923-84210974 | + | 453  |
| OTTHUMG00000020097 | OTTHUMT00000052822  | chr9:84258080-84259960 | + | 596  |
| OTTHUMG00000020101 | OTTHUMT00000052827  | chr9:85024066-85038977 | + | 441  |
| OTTHUMG00000020140 | OTTHUMT00000052927  | chr9:88436882-88501231 | + | 527  |
| OTTHUMG00000020143 | OTTHUMT00000052930  | chr9:88753434-88806768 | + | 4380 |
| OTTHUMG00000020156 | OTTHUMT00000052953  | chr9:89668901-89671025 | + | 450  |
| OTTHUMG00000020178 | OTTHUMT00000052985  | chr9:90814769-90815213 | - | 444  |
| OTTHUMG00000020188 | OTTHUMT00000053003  | chr9:91506386-91524405 | + | 820  |
| OTTHUMG00000067508 | OTTHUMT000000144686 | chr9:91640962-91663020 | + | 913  |
| OTTHUMG00000067507 | OTTHUMT000000144685 | chr9:91642994-91644328 | - | 926  |
| OTTHUMG00000020189 | OTTHUMT00000053004  | chr9:91780384-91789588 | + | 455  |
| OTTHUMG00000020191 | OTTHUMT00000053006  | chr9:91822756-91843601 | - | 2716 |
| OTTHUMG00000020194 | OTTHUMT00000053009  | chr9:92103004-92235591 | - | 1010 |
| OTTHUMG00000020194 | OTTHUMT00000053010  | chr9:92185712-92235607 | - | 752  |
| OTTHUMG00000020197 | OTTHUMT00000053013  | chr9:92265626-92269047 | - | 407  |
| OTTHUMG00000020197 | OTTHUMT00000053014  | chr9:92265761-92384846 | - | 785  |
| OTTHUMG00000020197 | OTTHUMT00000053015  | chr9:92363131-92384796 | - | 289  |
| OTTHUMG00000020201 | OTTHUMT00000053023  | chr9:92759363-92767496 | - | 293  |
| OTTHUMG00000020202 | OTTHUMT00000053024  | chr9:92907060-92909407 | - | 812  |
| OTTHUMG00000020204 | OTTHUMT00000053026  | chr9:92921241-92965190 | - | 504  |
| OTTHUMG00000020203 | OTTHUMT00000053025  | chr9:92961872-92967679 | + | 2743 |
| OTTHUMG00000020208 | OTTHUMT00000053037  | chr9:93228341-93229247 | + | 472  |
| OTTHUMG00000020216 | OTTHUMT00000053052  | chr9:93943401-93950409 | + | 736  |
| OTTHUMG00000020216 | OTTHUMT00000053054  | chr9:93943542-93950409 | + | 700  |
| OTTHUMG00000020216 | OTTHUMT00000053051  | chr9:93943570-93961711 | + | 1996 |
| OTTHUMG00000020216 | OTTHUMT00000053056  | chr9:93943699-93947213 | + | 420  |
| OTTHUMG00000020216 | OTTHUMT00000053053  | chr9:93947044-93950409 | + | 474  |
| OTTHUMG00000020216 | OTTHUMT00000053050  | chr9:93949695-93950409 | + | 465  |
| OTTHUMG00000020216 | OTTHUMT00000053049  | chr9:93949815-93950409 | + | 454  |
| OTTHUMG00000020214 | OTTHUMT00000053047  | chr9:93952484-93959548 | - | 209  |
| OTTHUMG00000020216 | OTTHUMT00000053055  | chr9:93954697-93960591 | + | 790  |
| OTTHUMG00000020244 | OTTHUMT00000053137  | chr9:94949143-94950659 | + | 407  |
| OTTHUMG00000020245 | OTTHUMT00000053138  | chr9:95232445-95233402 | - | 639  |
| OTTHUMG00000020246 | OTTHUMT00000053139  | chr9:95237435-95239224 | - | 689  |
| OTTHUMG00000020254 | OTTHUMT00000053163  | chr9:95659186-95660436 | + | 389  |
| OTTHUMG00000020259 | OTTHUMT00000053172  | chr9:95978705-96006639 | - | 1283 |
| OTTHUMG00000020266 | OTTHUMT00000053185  | chr9:96287803-96289898 | + | 153  |
| OTTHUMG00000020281 | OTTHUMT00000053234  | chr9:97217602-97228899 | - | 737  |
| OTTHUMG00000020283 | OTTHUMT00000053236  | chr9:97401648-97408389 | - | 392  |
| OTTHUMG00000020291 | OTTHUMT00000053254  | chr9:97897314-97904015 | + | 1571 |
| OTTHUMG00000020301 | OTTHUMT00000053285  | chr9:98489159-98523224 | + | 423  |
| OTTHUMG00000020320 | OTTHUMT00000053308  | chr9:99035304-99037117 | + | 279  |
| OTTHUMG00000020335 | OTTHUMT00000053343  | chr9:99608038-99612111 | - | 202  |

|                    |                    |                          |   |      |
|--------------------|--------------------|--------------------------|---|------|
| OTTHUMG00000020352 | OTTHUMT00000053389 | chr9:100985476-100986994 | + | 437  |
| OTTHUMG00000020357 | OTTHUMT00000053396 | chr9:101333799-101339027 | + | 417  |
| OTTHUMG00000020358 | OTTHUMT00000053397 | chr9:101387889-101621992 | - | 1537 |
| OTTHUMG00000020391 | OTTHUMT00000053458 | chr9:104092223-104093015 | + | 711  |
| OTTHUMG00000020399 | OTTHUMT00000053466 | chr9:104942626-105127137 | - | 3728 |
| OTTHUMG00000020398 | OTTHUMT00000053465 | chr9:105045829-105055273 | + | 200  |
| OTTHUMG00000020399 | OTTHUMT00000053467 | chr9:105066714-105126881 | - | 583  |
| OTTHUMG00000020400 | OTTHUMT00000053468 | chr9:105164055-105231995 | - | 525  |
| OTTHUMG00000020419 | OTTHUMT00000053496 | chr9:106792898-106793883 | - | 604  |
| OTTHUMG00000020432 | OTTHUMT00000053524 | chr9:107863456-107867095 | - | 434  |
| OTTHUMG00000020433 | OTTHUMT00000053526 | chr9:108080494-108406897 | + | 1679 |
| OTTHUMG00000020433 | OTTHUMT00000053525 | chr9:108252918-108406897 | + | 1309 |
| OTTHUMG00000020437 | OTTHUMT00000053531 | chr9:108386244-108394054 | - | 369  |
| OTTHUMG00000020434 | OTTHUMT00000053527 | chr9:108417180-108417908 | - | 595  |
| OTTHUMG00000020435 | OTTHUMT00000053529 | chr9:108418160-108481900 | + | 2048 |
| OTTHUMG00000020435 | OTTHUMT00000053528 | chr9:108466852-108504764 | + | 686  |
| OTTHUMG00000020447 | OTTHUMT00000053552 | chr9:109222386-109232904 | - | 404  |
| OTTHUMG00000020447 | OTTHUMT00000053553 | chr9:109229342-109230504 | - | 205  |
| OTTHUMG00000020457 | OTTHUMT00000053566 | chr9:110054255-110056921 | - | 222  |
| OTTHUMG00000020459 | OTTHUMT00000053568 | chr9:110503471-110505193 | + | 395  |
| OTTHUMG00000020483 | OTTHUMT00000053625 | chr9:112401576-112407320 | + | 632  |
| OTTHUMG00000020487 | OTTHUMT00000053635 | chr9:112941347-113086937 | - | 741  |
| OTTHUMG00000020528 | OTTHUMT00000053742 | chr9:115421329-115424735 | + | 3041 |
| OTTHUMG00000020530 | OTTHUMT00000053744 | chr9:115453057-115484956 | + | 1220 |
| OTTHUMG00000020544 | OTTHUMT00000053785 | chr9:116458405-116459873 | - | 434  |
| OTTHUMG00000020544 | OTTHUMT00000053786 | chr9:116458405-116464475 | - | 402  |
| OTTHUMG00000020542 | OTTHUMT00000053783 | chr9:116468537-116473850 | - | 546  |
| OTTHUMG00000020548 | OTTHUMT00000053790 | chr9:116921639-116940509 | - | 1519 |
| OTTHUMG00000020550 | OTTHUMT00000053794 | chr9:117541763-117546332 | + | 386  |
| OTTHUMG00000020552 | OTTHUMT00000053796 | chr9:117814461-117815065 | + | 507  |
| OTTHUMG00000020560 | OTTHUMT00000053806 | chr9:119264393-119268359 | - | 749  |
| OTTHUMG00000020561 | OTTHUMT00000053807 | chr9:119450705-119459126 | + | 1293 |
| OTTHUMG00000020564 | OTTHUMT00000053810 | chr9:119585547-119670170 | + | 520  |
| OTTHUMG00000020563 | OTTHUMT00000053809 | chr9:119642421-119699355 | - | 621  |
| OTTHUMG00000020566 | OTTHUMT00000053812 | chr9:120489851-120508059 | - | 384  |
| OTTHUMG00000020567 | OTTHUMT00000053813 | chr9:120542662-120547411 | + | 254  |
| OTTHUMG00000020570 | OTTHUMT00000053818 | chr9:121775193-121776421 | + | 379  |
| OTTHUMG00000020610 | OTTHUMT00000053940 | chr9:124203070-124205006 | - | 295  |
| OTTHUMG00000020611 | OTTHUMT00000053941 | chr9:124205507-124251077 | + | 824  |
| OTTHUMG00000020654 | OTTHUMT00000054028 | chr9:126317038-126318156 | + | 264  |
| OTTHUMG00000020682 | OTTHUMT00000054083 | chr9:127545854-127547840 | - | 507  |
| OTTHUMG00000020685 | OTTHUMT00000054108 | chr9:127859680-127961713 | + | 314  |
| OTTHUMG00000020686 | OTTHUMT00000054109 | chr9:128072221-128078018 | - | 2099 |
| OTTHUMG00000020688 | OTTHUMT00000054116 | chr9:128318517-128320908 | + | 717  |
| OTTHUMG00000020689 | OTTHUMT00000054117 | chr9:128329718-128332443 | + | 337  |

|                    |                     |                          |   |      |
|--------------------|---------------------|--------------------------|---|------|
| OTTHUMG00000020698 | OTTHUMT00000054147  | chr9:129026711-129043415 | + | 2624 |
| OTTHUMG00000020726 | OTTHUMT00000054329  | chr9:129841235-129859462 | - | 378  |
| OTTHUMG00000020737 | OTTHUMT00000054410  | chr9:129913271-129920793 | - | 3796 |
| OTTHUMG00000020753 | OTTHUMT00000054468  | chr9:130465234-130465678 | - | 332  |
| OTTHUMG00000020777 | OTTHUMT00000054571  | chr9:131060454-131061946 | + | 963  |
| OTTHUMG00000020776 | OTTHUMT00000054570  | chr9:131061162-131063681 | + | 393  |
| OTTHUMG00000020775 | OTTHUMT00000054569  | chr9:131084558-131087828 | + | 580  |
| OTTHUMG00000020778 | OTTHUMT00000054572  | chr9:131136006-131149499 | + | 897  |
| OTTHUMG00000020780 | OTTHUMT000000315870 | chr9:131232752-131249390 | - | 1844 |
| OTTHUMG00000020779 | OTTHUMT00000054574  | chr9:131240316-131241218 | + | 798  |
| OTTHUMG00000020780 | OTTHUMT00000054575  | chr9:131248732-131253522 | - | 457  |
| OTTHUMG00000020783 | OTTHUMT00000054578  | chr9:131285551-131306374 | + | 1399 |
| OTTHUMG00000020783 | OTTHUMT00000054579  | chr9:131290645-131306374 | + | 1884 |
| OTTHUMG00000020783 | OTTHUMT00000106519  | chr9:131291200-131307181 | + | 1957 |
| OTTHUMG00000020783 | OTTHUMT00000054580  | chr9:131291207-131315768 | + | 1649 |
| OTTHUMG00000020783 | OTTHUMT00000054583  | chr9:131292919-131304614 | + | 602  |
| OTTHUMG00000020783 | OTTHUMT00000106520  | chr9:131293092-131305674 | + | 563  |
| OTTHUMG00000020783 | OTTHUMT00000054581  | chr9:131300439-131305765 | + | 467  |
| OTTHUMG00000046208 | OTTHUMT00000106525  | chr9:131304090-131315786 | + | 380  |
| OTTHUMG00000020783 | OTTHUMT00000054582  | chr9:131305102-131315617 | + | 735  |
| OTTHUMG00000020784 | OTTHUMT00000054584  | chr9:131377509-131386656 | + | 2445 |
| OTTHUMG00000020831 | OTTHUMT00000054768  | chr9:133681400-133686196 | + | 826  |
| OTTHUMG00000020845 | OTTHUMT00000054804  | chr9:134812277-134816764 | + | 524  |
| OTTHUMG00000020880 | OTTHUMT00000054936  | chr9:135880382-135883045 | + | 2236 |
| OTTHUMG00000020880 | OTTHUMT00000054937  | chr9:135880438-135883045 | + | 2298 |
| OTTHUMG00000020883 | OTTHUMT00000054944  | chr9:136325598-136327064 | - | 741  |
| OTTHUMG00000020884 | OTTHUMT00000054945  | chr9:136537139-136553109 | - | 447  |
| OTTHUMG00000020886 | OTTHUMT00000054947  | chr9:136558849-136576911 | - | 426  |
| OTTHUMG00000020885 | OTTHUMT00000054946  | chr9:136584405-136585564 | + | 278  |
| OTTHUMG00000020888 | OTTHUMT00000054951  | chr9:136614146-136616857 | + | 2396 |
| OTTHUMG00000020889 | OTTHUMT00000054952  | chr9:136659497-136661073 | + | 597  |
| OTTHUMG00000020894 | OTTHUMT00000054962  | chr9:136968818-136974862 | + | 459  |
| OTTHUMG00000020899 | OTTHUMT00000054979  | chr9:137236389-137269264 | - | 525  |
| OTTHUMG00000020898 | OTTHUMT00000054978  | chr9:137277363-137284375 | - | 884  |
| OTTHUMG00000020901 | OTTHUMT00000054981  | chr9:137384351-137385887 | + | 387  |
| OTTHUMG00000020906 | OTTHUMT00000054990  | chr9:137496165-137496547 | - | 246  |
| OTTHUMG00000020905 | OTTHUMT00000054989  | chr9:137499755-137503916 | + | 793  |
| OTTHUMG00000153545 | OTTHUMT000000331581 | chr9:137645963-137647175 | + | 200  |
| OTTHUMG00000020999 | OTTHUMT00000055377  | chr9:140210204-140213596 | - | 536  |
| OTTHUMG00000021049 | OTTHUMT00000055574  | chrX:201725-202586       | + | 426  |
| OTTHUMG00000021054 | OTTHUMT00000055588  | chrX:870956-875100       | + | 586  |
| OTTHUMG00000021061 | OTTHUMT00000055604  | chrX:1475918-1478295     | - | 367  |
| OTTHUMG00000021062 | OTTHUMT00000055605  | chrX:1811477-1820881     | + | 442  |
| OTTHUMG00000021062 | OTTHUMT00000055606  | chrX:1813010-1834878     | + | 380  |
| OTTHUMG00000021064 | OTTHUMT00000055610  | chrX:1846240-1847669     | + | 546  |

|                    |                    |                        |   |      |
|--------------------|--------------------|------------------------|---|------|
| OTTHUMG00000021071 | OTTHUMT00000105117 | chrX:2537433-2585270   | + | 2781 |
| OTTHUMG00000021071 | OTTHUMT00000055621 | chrX:2537435-2566370   | + | 974  |
| OTTHUMG00000021072 | OTTHUMT00000055623 | chrX:2541029-2543388   | - | 1338 |
| OTTHUMG00000021071 | OTTHUMT00000055622 | chrX:2543993-2566369   | + | 2744 |
| OTTHUMG00000067420 | OTTHUMT00000144380 | chrX:3857910-3865896   | - | 2116 |
| OTTHUMG00000021088 | OTTHUMT00000055663 | chrX:4555241-4561613   | - | 1181 |
| OTTHUMG00000021092 | OTTHUMT00000055668 | chrX:5581462-5653998   | - | 624  |
| OTTHUMG00000021092 | OTTHUMT00000055667 | chrX:5581462-5654346   | - | 857  |
| OTTHUMG00000021092 | OTTHUMT00000055669 | chrX:5581464-5654121   | - | 443  |
| OTTHUMG00000021098 | OTTHUMT00000055680 | chrX:6595906-6649585   | - | 514  |
| OTTHUMG00000021104 | OTTHUMT00000055689 | chrX:7935419-7946201   | + | 175  |
| OTTHUMG00000021111 | OTTHUMT00000055698 | chrX:8791902-8795642   | - | 463  |
| OTTHUMG00000021115 | OTTHUMT00000055705 | chrX:9177960-9203246   | + | 1713 |
| OTTHUMG00000021126 | OTTHUMT00000055733 | chrX:10170379-10293363 | + | 606  |
| OTTHUMG00000021149 | OTTHUMT00000055788 | chrX:13194088-13231432 | - | 1494 |
| OTTHUMG00000021149 | OTTHUMT00000107231 | chrX:13194582-13231492 | - | 925  |
| OTTHUMG00000021151 | OTTHUMT00000055790 | chrX:13263281-13269865 | + | 573  |
| OTTHUMG00000021151 | OTTHUMT00000055791 | chrX:13264421-13301674 | + | 472  |
| OTTHUMG00000021161 | OTTHUMT00000055820 | chrX:13883433-13891944 | + | 694  |
| OTTHUMG00000021163 | OTTHUMT00000055825 | chrX:13908106-13916860 | - | 542  |
| OTTHUMG00000021210 | OTTHUMT00000055939 | chrX:17898238-18032685 | - | 703  |
| OTTHUMG00000021238 | OTTHUMT00000056029 | chrX:21821639-21829947 | + | 7617 |
| OTTHUMG00000021246 | OTTHUMT00000056041 | chrX:22626495-22697004 | + | 380  |
| OTTHUMG00000021281 | OTTHUMT00000056119 | chrX:25806377-25821582 | + | 546  |
| OTTHUMG00000021297 | OTTHUMT00000056135 | chrX:27086943-27104336 | - | 589  |
| OTTHUMG00000021313 | OTTHUMT00000056151 | chrX:28499570-28514433 | - | 753  |
| OTTHUMG00000021338 | OTTHUMT00000056203 | chrX:33654546-33870318 | + | 492  |
| OTTHUMG00000021338 | OTTHUMT00000056204 | chrX:33670156-33870273 | + | 336  |
| OTTHUMG00000024091 | OTTHUMT00000060654 | chrX:38514528-38543855 | + | 1175 |
| OTTHUMG00000024094 | OTTHUMT00000060658 | chrX:38970300-39043984 | - | 825  |
| OTTHUMG00000024095 | OTTHUMT00000060659 | chrX:39049154-39071560 | - | 1769 |
| OTTHUMG00000024095 | OTTHUMT00000144797 | chrX:39049832-39071559 | - | 671  |
| OTTHUMG00000024096 | OTTHUMT00000060660 | chrX:39111483-39135972 | - | 874  |
| OTTHUMG00000024097 | OTTHUMT00000060661 | chrX:39145450-39179022 | - | 782  |
| OTTHUMG00000024099 | OTTHUMT00000060663 | chrX:39753473-39756379 | + | 2689 |
| OTTHUMG00000033140 | OTTHUMT00000080721 | chrX:40007114-40031917 | + | 2997 |
| OTTHUMG00000033140 | OTTHUMT00000080722 | chrX:40007163-40011419 | + | 705  |
| OTTHUMG00000021366 | OTTHUMT00000056247 | chrX:41019936-41020975 | + | 833  |
| OTTHUMG00000021379 | OTTHUMT00000056291 | chrX:41792080-41799033 | - | 476  |
| OTTHUMG00000021383 | OTTHUMT00000056295 | chrX:41996656-42443486 | + | 887  |
| OTTHUMG00000021383 | OTTHUMT00000056296 | chrX:42200774-42443580 | + | 709  |
| OTTHUMG00000021384 | OTTHUMT00000056297 | chrX:42921187-42970791 | + | 2222 |
| OTTHUMG00000021406 | OTTHUMT00000056342 | chrX:45249577-45267833 | + | 2211 |
| OTTHUMG00000021406 | OTTHUMT00000056341 | chrX:45254673-45374391 | + | 634  |
| OTTHUMG00000021411 | OTTHUMT00000056348 | chrX:45592272-45595391 | - | 1958 |

|                    |                    |                        |   |       |
|--------------------|--------------------|------------------------|---|-------|
| OTTHUMG00000021411 | OTTHUMT00000056347 | chrX:45592453-45595864 | - | 372   |
| OTTHUMG00000021416 | OTTHUMT00000056353 | chrX:46070303-46072024 | - | 624   |
| OTTHUMG00000021439 | OTTHUMT00000056411 | chrX:47042195-47043064 | + | 475   |
| OTTHUMG00000021486 | OTTHUMT00000056483 | chrX:48078054-48078818 | - | 268   |
| OTTHUMG00000024122 | OTTHUMT00000060763 | chrX:48323106-48324489 | - | 448   |
| OTTHUMG00000021533 | OTTHUMT00000056582 | chrX:51116536-51156054 | - | 449   |
| OTTHUMG00000021532 | OTTHUMT00000056581 | chrX:51156103-51158122 | + | 584   |
| OTTHUMG00000021532 | OTTHUMT00000056580 | chrX:51156123-51225253 | + | 404   |
| OTTHUMG00000021535 | OTTHUMT00000056584 | chrX:51261682-51270597 | - | 456   |
| OTTHUMG00000021599 | OTTHUMT00000056721 | chrX:53139617-53140765 | - | 613   |
| OTTHUMG00000021671 | OTTHUMT00000056896 | chrX:56661549-56667616 | + | 711   |
| OTTHUMG00000021679 | OTTHUMT00000056910 | chrX:57016668-57017954 | + | 642   |
| OTTHUMG00000021699 | OTTHUMT00000056936 | chrX:62646547-62697654 | - | 526   |
| OTTHUMG00000021722 | OTTHUMT00000056978 | chrX:64724986-64726374 | + | 536   |
| OTTHUMG00000021722 | OTTHUMT00000056979 | chrX:64725003-64737355 | + | 484   |
| OTTHUMG00000021722 | OTTHUMT00000056980 | chrX:64725009-64730030 | + | 380   |
| OTTHUMG00000021729 | OTTHUMT00000056991 | chrX:65136318-65137638 | + | 855   |
| OTTHUMG00000021757 | OTTHUMT00000057038 | chrX:68706237-68706925 | - | 453   |
| OTTHUMG00000021796 | OTTHUMT00000057132 | chrX:70320134-70334750 | - | 724   |
| OTTHUMG00000022722 | OTTHUMT00000058987 | chrX:70799570-70802328 | - | 691   |
| OTTHUMG00000022722 | OTTHUMT00000058988 | chrX:70799573-70800846 | - | 620   |
| OTTHUMG00000022702 | OTTHUMT00000058911 | chrX:70850946-70852962 | - | 527   |
| OTTHUMG00000022687 | OTTHUMT00000058868 | chrX:70856491-70857375 | + | 217   |
| OTTHUMG00000021805 | OTTHUMT00000057168 | chrX:70897350-70898234 | - | 217   |
| OTTHUMG00000021804 | OTTHUMT00000057167 | chrX:70901763-70903779 | + | 527   |
| OTTHUMG00000035613 | OTTHUMT00000086423 | chrX:71918414-71919179 | - | 432   |
| OTTHUMG00000035613 | OTTHUMT00000086424 | chrX:71918414-71919209 | - | 450   |
| OTTHUMG00000021819 | OTTHUMT00000057212 | chrX:71943984-71944739 | - | 430   |
| OTTHUMG00000021819 | OTTHUMT00000057213 | chrX:71943984-71944769 | - | 448   |
| OTTHUMG00000021839 | OTTHUMT00000083628 | chrX:72957211-72963015 | - | 718   |
| OTTHUMG00000021839 | OTTHUMT00000057241 | chrX:72957213-72963366 | - | 444   |
| OTTHUMG00000021839 | OTTHUMT00000083629 | chrX:72957216-72962861 | - | 721   |
| OTTHUMG00000021839 | OTTHUMT00000057240 | chrX:72957216-72962904 | - | 747   |
| OTTHUMG00000021839 | OTTHUMT00000057239 | chrX:72957216-72989313 | - | 19269 |
| OTTHUMG00000021839 | OTTHUMT00000083630 | chrX:72964269-72966027 | - | 674   |
| OTTHUMG00000021839 | OTTHUMT00000057242 | chrX:72964361-72967770 | - | 434   |
| OTTHUMG00000021840 | OTTHUMT00000057243 | chrX:73080902-73137051 | + | 2189  |
| OTTHUMG00000021840 | OTTHUMT00000057244 | chrX:73080906-73081506 | + | 481   |
| OTTHUMG00000021840 | OTTHUMT00000057245 | chrX:73080927-73083990 | + | 471   |
| OTTHUMG00000021838 | OTTHUMT00000057238 | chrX:73085533-73086118 | + | 449   |
| OTTHUMG00000021850 | OTTHUMT00000057256 | chrX:73384424-73430087 | - | 702   |
| OTTHUMG00000021850 | OTTHUMT00000057255 | chrX:73414934-73429160 | - | 2593  |
| OTTHUMG00000021850 | OTTHUMT00000057257 | chrX:73416961-73428911 | - | 575   |
| OTTHUMG00000021850 | OTTHUMT00000057258 | chrX:73417021-73428635 | - | 650   |
| OTTHUMG00000021850 | OTTHUMT00000057259 | chrX:73418265-73421422 | - | 262   |

|                    |                    |                          |   |      |
|--------------------|--------------------|--------------------------|---|------|
| OTTHUMG00000021872 | OTTHUMT00000057290 | chrX:75039665-75041418   | + | 1232 |
| OTTHUMG00000021932 | OTTHUMT00000057387 | chrX:84352368-84361360   | + | 1131 |
| OTTHUMG00000021953 | OTTHUMT00000057423 | chrX:88565393-88583566   | + | 279  |
| OTTHUMG00000021953 | OTTHUMT00000057422 | chrX:88565393-88588638   | + | 305  |
| OTTHUMG00000021958 | OTTHUMT00000057428 | chrX:90449436-90450533   | + | 739  |
| OTTHUMG00000022014 | OTTHUMT00000057506 | chrX:100145477-100149618 | - | 3214 |
| OTTHUMG00000022085 | OTTHUMT00000057680 | chrX:102025998-102047742 | + | 1127 |
| OTTHUMG00000022085 | OTTHUMT00000057681 | chrX:102039165-102047275 | + | 435  |
| OTTHUMG00000022105 | OTTHUMT00000057735 | chrX:102767660-102768076 | - | 359  |
| OTTHUMG00000022115 | OTTHUMT00000057749 | chrX:103058661-103060787 | - | 1225 |
| OTTHUMG00000022220 | OTTHUMT00000057955 | chrX:112746245-112748097 | - | 467  |
| OTTHUMG00000033102 | OTTHUMT00000080578 | chrX:114863553-114865637 | + | 441  |
| OTTHUMG00000033102 | OTTHUMT00000080579 | chrX:114863599-114865639 | + | 278  |
| OTTHUMG00000022240 | OTTHUMT00000057981 | chrX:114946547-114999450 | - | 2441 |
| OTTHUMG00000022248 | OTTHUMT00000057990 | chrX:115710906-115712184 | - | 510  |
| OTTHUMG00000022260 | OTTHUMT00000058013 | chrX:117857547-117875877 | + | 2283 |
| OTTHUMG00000022267 | OTTHUMT00000058023 | chrX:118270802-118275674 | - | 916  |
| OTTHUMG00000022271 | OTTHUMT00000058027 | chrX:118309520-118353601 | + | 2903 |
| OTTHUMG00000022289 | OTTHUMT00000058082 | chrX:119028703-119033529 | - | 768  |
| OTTHUMG00000022291 | OTTHUMT00000058084 | chrX:119135580-119137638 | - | 276  |
| OTTHUMG00000022295 | OTTHUMT00000058088 | chrX:119254333-119263116 | - | 2387 |
| OTTHUMG00000022349 | OTTHUMT00000058182 | chrX:125071426-125077226 | + | 636  |
| OTTHUMG00000022456 | OTTHUMT00000058374 | chrX:133511669-133521619 | + | 721  |
| OTTHUMG00000022462 | OTTHUMT00000058387 | chrX:133911245-133915078 | + | 958  |
| OTTHUMG00000022468 | OTTHUMT00000058397 | chrX:134056681-134057260 | - | 303  |
| OTTHUMG00000022468 | OTTHUMT00000058395 | chrX:134056809-134060054 | - | 468  |
| OTTHUMG00000022468 | OTTHUMT00000058396 | chrX:134058543-134060320 | - | 865  |
| OTTHUMG00000022476 | OTTHUMT00000058407 | chrX:134214190-134215172 | + | 558  |
| OTTHUMG00000022476 | OTTHUMT00000058408 | chrX:134214406-134215197 | + | 386  |
| OTTHUMG00000022481 | OTTHUMT00000058414 | chrX:134358020-134359355 | + | 403  |
| OTTHUMG00000022479 | OTTHUMT00000058412 | chrX:134383534-134387348 | + | 2911 |
| OTTHUMG00000022524 | OTTHUMT00000058522 | chrX:136466016-136473750 | - | 301  |
| OTTHUMG00000022524 | OTTHUMT00000058523 | chrX:136470494-136474212 | - | 584  |
| OTTHUMG00000022529 | OTTHUMT00000058530 | chrX:137536904-137537170 | + | 140  |
| OTTHUMG00000022543 | OTTHUMT00000058576 | chrX:139125853-139126622 | - | 580  |
| OTTHUMG00000022547 | OTTHUMT00000058580 | chrX:139590937-139597536 | - | 320  |
| OTTHUMG00000022550 | OTTHUMT00000058584 | chrX:139841569-139907279 | + | 214  |
| OTTHUMG00000022592 | OTTHUMT00000058630 | chrX:144122141-144122831 | - | 376  |
| OTTHUMG00000022599 | OTTHUMT00000058638 | chrX:145698994-145699619 | + | 434  |
| OTTHUMG00000022600 | OTTHUMT00000058639 | chrX:145703316-145703936 | - | 429  |
| OTTHUMG00000022605 | OTTHUMT00000058654 | chrX:146789388-146790669 | - | 532  |
| OTTHUMG00000024161 | OTTHUMT00000060865 | chrX:149834944-149840069 | + | 516  |
| OTTHUMG00000024161 | OTTHUMT00000060866 | chrX:149836294-149840069 | + | 439  |
| OTTHUMG00000032120 | OTTHUMT00000078422 | chrX:150434679-150435373 | + | 480  |
| OTTHUMG00000022647 | OTTHUMT00000058759 | chrX:151639851-151640796 | - | 846  |

|                    |                    |                          |   |     |
|--------------------|--------------------|--------------------------|---|-----|
| OTTHUMG00000024194 | OTTHUMT00000060942 | chrX:152088524-152092921 | - | 917 |
| OTTHUMG00000024194 | OTTHUMT00000060943 | chrX:152088866-152092931 | - | 539 |
| OTTHUMG00000024201 | OTTHUMT00000060955 | chrX:152529343-152531574 | + | 615 |
| OTTHUMG00000022655 | OTTHUMT00000058774 | chrX:153215504-153216581 | - | 339 |
| OTTHUMG00000022671 | OTTHUMT00000058813 | chrX:154351141-154369901 | + | 551 |

**Table S1**



| Transcript ID      | Fold | 5' RefSeq gene id | 5' HUGO gene id | 3' Refseq gene id |
|--------------------|------|-------------------|-----------------|-------------------|
| OTTHUMT00000091113 | 9.62 | NM_024746         | HHIPL2          | NM_144729         |
| OTTHUMT00000034662 | 8.32 | NM_173080         | SPRR4           | NM_005547         |
| OTTHUMT00000055788 | 7.65 | NM_001135995      | ATXN3L          | NM_174901         |
| OTTHUMT00000047811 | 6.53 | NM_133446         | AGAP4           | NM_015262         |
| OTTHUMT00000107231 | 6.29 | NM_001135995      | ATXN3L          | NM_174901         |
| OTTHUMT00000034506 | 6.25 | NM_178431         | LCE3A           | NM_178430         |
| OTTHUMT00000034017 | 3.16 | NM_001122965      | RPTN            | NM_001009931      |
| OTTHUMT00000171683 | 2.9  | NM_007038         | ADAMTS5         | NM_013240         |
| OTTHUMT00000132190 | 2.76 | NM_152402         | TRAM1L1         | NM_004784         |
| OTTHUMT00000171684 | 2.7  | NM_007038         | ADAMTS5         | NM_013240         |
| OTTHUMT00000171685 | 2.61 | NM_007038         | ADAMTS5         | NM_013240         |
| OTTHUMT00000255302 | 2.51 | NM_000346         | SOX9            | NM_000891         |
| OTTHUMT00000129613 | 2.39 | NM_006773         | DDX18           | NM_019044         |
| OTTHUMT00000041310 | 2.29 | NM_022726         | ELOVL4          | NM_031469         |
| OTTHUMT00000006706 | 2.25 | NM_001005484      | OR4F5           | NR_024321         |
| OTTHUMT00000042411 | 2.24 | NM_006290         | TNFAIP3         | NM_175747         |
| OTTHUMT00000007987 | 2.24 | NR_024321         | NCRNA00115      | NM_001005484      |
| OTTHUMT00000079542 | 2.22 | NM_020708         | SLC12A5         | NM_004994         |
| OTTHUMT00000332207 | 2.21 | NM_001508         | GPR39           | NM_214461         |
| OTTHUMT00000012834 | 2.21 | NM_015627         | LDLRAP1         | NM_020379         |
| OTTHUMT00000046559 | 2.12 | NM_024701         | ASB13           | NM_005185         |
| OTTHUMT00000053525 | 2.05 | NM_018112         | TMEM38B         | NM_021224         |
| OTTHUMT00000053526 | 2.04 | NM_018112         | TMEM38B         | NM_021224         |
| OTTHUMT00000099181 | 2.02 | NM_006618         | KDM5B           | NR_002929         |
| OTTHUMT00000099182 | 2.02 | NM_006618         | KDM5B           | NR_002929         |
| OTTHUMT00000046670 | 1.93 | NM_006257         | PRKCQ           | NM_001029880      |
| OTTHUMT00000058397 | 1.92 | NM_017863         | CXorf48         | NM_001134321      |
| OTTHUMT00000046763 | 1.92 | NM_001083591      | CUGBP2          | NM_001080491      |
| OTTHUMT00000045413 | 1.91 | NM_015567         | SLITRK5         | NM_032229         |
| OTTHUMT00000058412 | 1.89 | NM_152695         | ZNF449          | NM_182540         |
| OTTHUMT00000047729 | 1.89 | NR_002726         | HNRNPA3P1       | NM_006973         |
| OTTHUMT00000046999 | 1.83 | NM_024948         | C10orf97        | NM_001001484      |
| OTTHUMT00000087261 | 1.82 | NM_022664         | ECM1            | NM_025008         |
| OTTHUMT00000046998 | 1.81 | NM_024948         | C10orf97        | NM_001001484      |
| OTTHUMT00000058395 | 1.77 | NM_017863         | CXorf48         | NM_001134321      |
| OTTHUMT00000054579 | 1.76 | NM_001012715      | C9orf106        | NM_199350         |
| OTTHUMT00000007986 | 1.76 | NM_001005484      | OR4F5           | NR_024321         |
| OTTHUMT00000171679 | 1.75 | NM_013240         | N6AMT1          | NM_007038         |
| OTTHUMT00000054578 | 1.75 | NM_001012715      | C9orf106        | NM_199350         |
| OTTHUMT00000006708 | 1.74 | NM_001005484      | OR4F5           | NR_024321         |
| OTTHUMT00000090219 | 1.74 | NM_018713         | SLC30A10        | NM_138794         |
| OTTHUMT00000006615 | 1.71 | NM_007365         | PADI2           | NM_013358         |
| OTTHUMT00000255296 | 1.68 | NM_000346         | SOX9            | NM_000891         |

|                     |       |                   |            |                |
|---------------------|-------|-------------------|------------|----------------|
| OTTHUMT00000051076  | 1.67  | NM_138499         | PWWP2B     | NM_173541      |
| OTTHUMT00000055604  | 1.66  | NM_001141919      | XG         | NM_000718      |
| OTTHUMT00000132196  | 1.64  | NM_004784         | NDST3      | NM_152402      |
| OTTHUMT00000318140  | 1.62  | NM_058238         | WNT7B      | NM_013236      |
| OTTHUMT00000046513  | 1.62  | NM_001040177      | AKR1CL2    | NM_001300      |
| OTTHUMT00000046512  | 1.61  | NM_001040177      | AKR1CL2    | NM_001300      |
| OTTHUMT00000255297  | 1.61  | NM_000346         | SOX9       | NM_000891      |
| OTTHUMT00000079684  | 1.6   | NM_005194         | CEBPB      | NM_002827      |
| OTTHUMT00000040503  | 1.55  | NM_178174         | TREML1     | NM_021705      |
| OTTHUMT00000057680  | 1.55  | NM_001142530      | BHLHB9     | NM_001031834   |
| OTTHUMT00000319437  | 1.54  | NM_033257         | DGCR6L     | NR_003563      |
| OTTHUMT00000039131  | 1.54  | NR_024510_dup1    | NA         | NM_178230_dup2 |
| OTTHUMT00000046668  | 1.54  | NM_006257         | PRKCQ      | NM_001029880   |
| OTTHUMT00000040501  | 1.53  | NM_178174         | TREML1     | NM_021705      |
| OTTHUMT00000003226  | 1.52  | NR_024321         | NCRNA00115 | NM_001005484   |
| OTTHUMT00000319426  | 1.52  | NM_033257         | DGCR6L     | NR_003563      |
| OTTHUMT00000319431  | 1.52  | NM_033257         | DGCR6L     | NR_003563      |
| OTTHUMT000000055622 | 1.52  | NM_000718         | CACNA1B    | NM_001141919   |
| OTTHUMT00000075332  | 1.51  | NM_014941         | MORC2      | NM_006932      |
| OTTHUMT00000004931  | 1.51  | NM_001080397      | SLC45A1    | NM_018948      |
| OTTHUMT00000158310  | 1.5   | NM_014941         | MORC2      | NM_006932      |
| OTTHUMT00000314057  | 1.5   | NM_002064         | GLRX       | NM_012081      |
| OTTHUMT000000054581 | 1.5   | NM_001012715      | C9orf106   | NM_199350      |
| OTTHUMT000000055621 | 1.5   | NM_000718         | CACNA1B    | NM_001141919   |
| OTTHUMT000000037573 | 1.5   | NR_003955         | LOC647121  | NM_001123068   |
| OTTHUMT000000050558 | 1.5   | NM_181840         | KCNK18     | NM_001112704   |
| OTTHUMT000000077578 | -1.5  | NM_080836         | STK35      | NM_003245      |
| OTTHUMT00000001042  | -1.5  | NM_139235         | NOL6       | NR_003573      |
| OTTHUMT000000092153 | -1.5  | NM_207468         | FAM177B    | NM_032890      |
| OTTHUMT000000077577 | -1.51 | NM_080836         | STK35      | NM_003245      |
| OTTHUMT000000054584 | -1.51 | NM_001012715      | C9orf106   | NM_199350      |
| OTTHUMT000000046024 | -1.51 | NM_001102663_dup1 | NA         | NM_001128589   |
| OTTHUMT00000255101  | -1.51 | NM_006572         | GNA13      | NM_199340      |
| OTTHUMT000000078010 | -1.52 | NM_000214         | JAG1       | NM_181443      |
| OTTHUMT000000080060 | -1.57 | NM_018270         | C2orf20    | NM_002531      |
| OTTHUMT00000324253  | -1.58 | NM_004180         | TANK       | NM_005805      |
| OTTHUMT00000193777  | -1.58 | NM_001697         | ATP5O      | NM_032476      |
| OTTHUMT00000144685  | -1.59 | NM_017594         | DIRAS2     | NR_024280      |
| OTTHUMT000000047657 | -1.66 | NR_024497         | LOC399744  | NR_024380      |
| OTTHUMT000000007984 | -1.66 | NM_001005484      | OR4F5      | NR_024321      |
| OTTHUMT000000057749 | -1.73 | NM_194324         | TMSB15B    | NM_016370      |
| OTTHUMT000000097859 | -1.74 | NM_152486         | SAMD11     | NR_015368      |
| OTTHUMT00000216872  | -1.8  | NM_031966         | CCNB1      | NM_005909      |
| OTTHUMT000000047656 | -1.85 | NR_024497         | LOC399744  | NR_024380      |

|                    |       |              |        |           |
|--------------------|-------|--------------|--------|-----------|
| OTTHUMT00000012071 | -1.99 | NM_005066    | SFPQ   | NM_024772 |
| OTTHUMT00000012075 | -2    | NM_005066    | SFPQ   | NM_024772 |
| OTTHUMT00000280613 | -2.17 | NM_031966    | CCNB1  | NM_005909 |
| OTTHUMT00000280614 | -2.31 | NM_031966    | CCNB1  | NM_005909 |
| OTTHUMT00000280612 | -2.33 | NM_031966    | CCNB1  | NM_005909 |
| OTTHUMT00000280615 | -2.37 | NM_031966    | CCNB1  | NM_005909 |
| OTTHUMT00000280616 | -2.38 | NM_031966    | CCNB1  | NM_005909 |
| OTTHUMT00000060639 | -2.72 | NM_033438    | SLAMF9 | NM_145167 |
| OTTHUMT00000060638 | -2.8  | NM_033438    | SLAMF9 | NM_145167 |
| OTTHUMT00000046743 | -3.46 | NM_001025077 | CUGBP2 | NM_002051 |
| OTTHUMT00000046744 | -3.55 | NM_001025077 | CUGBP2 | NM_002051 |

**Table S3**

|                 |
|-----------------|
| 3' HUGO gene id |
| DUSP10          |
| IVL             |
| FAM9C           |
| FAM21C          |
| FAM9C           |
| LCE2D           |
| HRNR            |
| N6AMT1          |
| NDST3           |
| N6AMT1          |
| N6AMT1          |
| KCNJ2           |
| CCDC93          |
| SH3BGRL2        |
| NCRNA00115      |
| OLIG3           |
| OR4F5           |
| MMP9            |
| C2orf27B        |
| MAN1C1          |
| CALML3          |
| ZNF462          |
| ZNF462          |
| LOC148709       |
| LOC148709       |
| SFMBT2          |
| FAM127B         |
| USP6NL          |
| SLITRK6         |
| DDX26B          |
| ZNF32           |
| PTER            |
| ADAMTSL4        |
| PTER            |
| FAM127B         |
| C9orf50         |
| NCRNA00115      |
| ADAMTS5         |
| C9orf50         |
| NCRNA00115      |
| LYPLAL1         |
| PADI1           |
| KCNJ2           |

|              |
|--------------|
| C10orf91     |
| CACNA1B      |
| TRAM1L1      |
| ATXN10       |
| KLF6         |
| KLF6         |
| KCNJ2        |
| PTPN1        |
| NFYA         |
| RAB40AL      |
| PI4KAP1      |
| NA           |
| SFMBT2       |
| NFYA         |
| OR4F5        |
| PI4KAP1      |
| PI4KAP1      |
| XG           |
| SMTN         |
| ERRFI1       |
| SMTN         |
| ELL2         |
| C9orf50      |
| XG           |
| PPIAL4G      |
| VAX1         |
| TGM3         |
| ANXA2P2      |
| DISP1        |
| TGM3         |
| C9orf50      |
| NA           |
| LRRC37A3     |
| BTBD3        |
| NTSR1        |
| PSMD14       |
| MRPS6        |
| LOC100129066 |
| LOC441666    |
| NCRNA00115   |
| RAB9B        |
| LOC643837    |
| MAP1B        |
| LOC441666    |

|       |
|-------|
| ZMYM1 |
|-------|

|       |
|-------|
| ZMYM1 |
|-------|

|       |
|-------|
| MAP1B |
|-------|

|      |
|------|
| PIGM |
|------|

|      |
|------|
| PIGM |
|------|

|       |
|-------|
| GATA3 |
|-------|

|       |
|-------|
| GATA3 |
|-------|

| SYMBOL    | Control siRNA | Snai1 siRNA | ncRNA-a7 siRNA |
|-----------|---------------|-------------|----------------|
| CIDEC     | 1             | 8.59        | 5.99           |
| CLDN2     | 1             | 6.60        | 8.95           |
| PPARG     | 1             | 3.93        | 3.22           |
| MUC5AC    | 1             | 3.69        | 1.19           |
| DCBLD2    | 1             | 3.27        | 3.38           |
| KIAA1199  | 1             | 2.98        | 4.54           |
| STK39     | 1             | 2.81        | 2.64           |
| SCD5      | 1             | 2.74        | 1.88           |
| IGFBP1    | 1             | 2.71        | 1.44           |
| PLAU      | 1             | 2.64        | 2.26           |
| IGSF3     | 1             | 2.51        | 2.69           |
| LRRC26    | 1             | 2.47        | 1.08           |
| GALNTL4   | 1             | 2.44        | 1.75           |
| OSTbeta   | 1             | 2.43        | 2.84           |
| PDLIM7    | 1             | 2.39        | 1.51           |
| LOC441282 | 1             | 2.37        | 3.53           |
| IFIT1     | 1             | 2.36        | 2.98           |
| LBP       | 1             | 2.36        | 1.47           |
| REEP1     | 1             | 2.34        | 1.72           |
| LARP6     | 1             | 2.34        | 1.99           |
| NUP210    | 1             | 2.33        | 1.86           |
| APPL2     | 1             | 2.32        | 2.21           |
| PKIB      | 1             | 2.25        | 1.97           |
| PKP2      | 1             | 2.24        | 1.74           |
| MPRIP     | 1             | 2.20        | 1.93           |
| BTBD11    | 1             | 2.20        | 2.35           |
| TIMP2     | 1             | 2.17        | 1.83           |
| ESAM      | 1             | 2.16        | 1.39           |
| PIGN      | 1             | 2.16        | 1.82           |
| WBSCR22   | 1             | 2.15        | 1.97           |
| NOTCH3    | 1             | 2.15        | 1.33           |
| CDH2      | 1             | 2.10        | 2.02           |
| HAS3      | 1             | 2.10        | 1.59           |
| SLC16A4   | 1             | 2.05        | 1.42           |
| UGT1A1    | 1             | 2.01        | 1.44           |
| DHRS9     | 1             | 2.00        | 1.67           |
| DKK1      | 1             | 2.00        | 2.10           |
| LOC653631 | 1             | 2.00        | 1.99           |
| NT5E      | 1             | 1.99        | 1.77           |
| ASGR1     | 1             | 1.98        | 2.17           |
| PVRL3     | 1             | 1.97        | 1.97           |
| C11orf9   | 1             | 1.97        | 1.15           |
| MORC4     | 1             | 1.97        | 2.75           |
| FTHL11    | 1             | 1.95        | 1.65           |
| MANBAL    | 1             | 1.94        | 1.86           |
| LUZP1     | 1             | 1.93        | 1.78           |

|           |   |      |      |
|-----------|---|------|------|
| PPPDE1    | 1 | 1.93 | 1.63 |
| ANXA10    | 1 | 1.91 | 1.26 |
| SLC11A2   | 1 | 1.91 | 1.28 |
| AXL       | 1 | 1.91 | 1.92 |
| FTHL3     | 1 | 1.90 | 1.64 |
| TPR       | 1 | 1.90 | 1.11 |
| CD68      | 1 | 1.90 | 1.48 |
| FTHL2     | 1 | 1.90 | 1.75 |
| CXorf39   | 1 | 1.89 | 1.08 |
| AGTR1     | 1 | 1.89 | 1.63 |
| NNMT      | 1 | 1.89 | 1.68 |
| FAM113B   | 1 | 1.88 | 1.92 |
| CD14      | 1 | 1.88 | 1.76 |
| MPP5      | 1 | 1.88 | 1.24 |
| ERBB3     | 1 | 1.86 | 1.50 |
| S100A3    | 1 | 1.85 | 2.03 |
| PI4K2B    | 1 | 1.85 | 1.45 |
| IL4R      | 1 | 1.85 | 1.34 |
| TNFRSF12A | 1 | 1.85 | 2.20 |
| TGM2      | 1 | 1.85 | 2.76 |
| EPAS1     | 1 | 1.84 | 1.86 |
| CD24      | 1 | 1.84 | 1.77 |
| TBC1D8    | 1 | 1.83 | 1.87 |
| PRKCA     | 1 | 1.83 | 1.77 |
| DLK2      | 1 | 1.83 | 1.46 |
| LAMC1     | 1 | 1.82 | 2.13 |
| STMN1     | 1 | 1.82 | 1.47 |
| KLHL4     | 1 | 1.82 | 1.86 |
| LIMA1     | 1 | 1.82 | 1.39 |
| IQGAP2    | 1 | 1.81 | 1.66 |
| DDAH1     | 1 | 1.81 | 1.92 |
| SERPINE2  | 1 | 1.81 | 1.65 |
| SIRT4     | 1 | 1.81 | 1.77 |
| ADRA1B    | 1 | 1.80 | 1.77 |
| WASPIP    | 1 | 1.80 | 1.29 |
| NR1H4     | 1 | 1.80 | 1.74 |
| CXCR7     | 1 | 1.79 | 1.36 |
| SHPK      | 1 | 1.79 | 1.32 |
| SPRED1    | 1 | 1.79 | 2.20 |
| SEMA4B    | 1 | 1.79 | 1.56 |
| AHNAK     | 1 | 1.79 | 1.60 |
| FAM108C1  | 1 | 1.78 | 1.55 |
| SRPX      | 1 | 1.78 | 2.06 |
| SPAG9     | 1 | 1.77 | 1.54 |
| ITGB4     | 1 | 1.77 | 1.65 |
| RASSF2    | 1 | 1.77 | 1.94 |
| TRIM31    | 1 | 1.77 | 1.05 |



|           |   |      |      |
|-----------|---|------|------|
| PLCE1     | 1 | 1.76 | 1.23 |
| KCNF1     | 1 | 1.76 | 1.62 |
| FCGBP     | 1 | 1.76 | 2.22 |
| RSPO3     | 1 | 1.76 | 1.21 |
| BMP1      | 1 | 1.76 | 2.15 |
| NRP2      | 1 | 1.75 | 1.08 |
| ACPL2     | 1 | 1.75 | 1.40 |
| ST3GAL5   | 1 | 1.73 | 1.33 |
| ITGA3     | 1 | 1.73 | 2.14 |
| CD70      | 1 | 1.73 | 1.31 |
| TYMS      | 1 | 1.73 | 1.48 |
| SLC39A8   | 1 | 1.73 | 1.51 |
| CACNG6    | 1 | 1.73 | 1.93 |
| CIDECP    | 1 | 1.73 | 1.35 |
| IGFBP2    | 1 | 1.72 | 1.67 |
| GPR56     | 1 | 1.72 | 2.05 |
| GABRE     | 1 | 1.72 | 1.49 |
| EVL       | 1 | 1.72 | 1.34 |
| DDC       | 1 | 1.70 | 1.86 |
| E2F5      | 1 | 1.69 | 1.89 |
| S100P     | 1 | 1.69 | 1.04 |
| HNF4A     | 1 | 1.69 | 1.20 |
| TRIM9     | 1 | 1.69 | 1.30 |
| TUBB4     | 1 | 1.68 | 1.37 |
| BDNF      | 1 | 1.68 | 1.43 |
| AGTR1     | 1 | 1.68 | 1.47 |
| ACLY      | 1 | 1.67 | 1.46 |
| GALNT5    | 1 | 1.67 | 1.49 |
| NIPA1     | 1 | 1.67 | 1.38 |
| HMGCS1    | 1 | 1.66 | 1.32 |
| NOSTRIN   | 1 | 1.66 | 2.28 |
| KIF3B     | 1 | 1.66 | 1.49 |
| PPFIBP2   | 1 | 1.66 | 1.95 |
| FLNB      | 1 | 1.66 | 1.84 |
| FBN2      | 1 | 1.66 | 1.07 |
| RRAGD     | 1 | 1.65 | 1.73 |
| CLDND2    | 1 | 1.65 | 1.31 |
| F2RL1     | 1 | 1.65 | 1.34 |
| ACSS1     | 1 | 1.65 | 1.36 |
| LOC730996 | 1 | 1.65 | 1.67 |
| BCAS1     | 1 | 1.64 | 2.62 |
| EPHB2     | 1 | 1.64 | 1.64 |
| LMNA      | 1 | 1.63 | 1.99 |
| RND1      | 1 | 1.63 | 1.63 |
| SPAG9     | 1 | 1.63 | 1.43 |
| A1CF      | 1 | 1.63 | 1.46 |
| DCP1A     | 1 | 1.63 | 1.16 |

|          |   |      |      |
|----------|---|------|------|
| RALA     | 1 | 1.63 | 1.35 |
| ALDH3A1  | 1 | 1.63 | 1.94 |
| DAB2     | 1 | 1.63 | 1.65 |
| CDC2L2   | 1 | 1.63 | 1.23 |
| MTSS1    | 1 | 1.63 | 1.16 |
| PLEKHA5  | 1 | 1.63 | 1.42 |
| ATP6VOE2 | 1 | 1.62 | 1.71 |
| C19orf12 | 1 | 1.62 | 1.58 |
| FAM175B  | 1 | 1.62 | 1.47 |
| IDS      | 1 | 1.62 | 1.63 |
| GLCE     | 1 | 1.62 | 1.39 |
| CIDEC    | 1 | 1.62 | 1.36 |
| KIF3B    | 1 | 1.62 | 1.69 |
| CREB3L3  | 1 | 1.61 | 1.13 |
| ALDH9A1  | 1 | 1.61 | 1.64 |
| ARFIP1   | 1 | 1.61 | 1.45 |
| CUGBP1   | 1 | 1.61 | 0.68 |
| WRB      | 1 | 1.61 | 1.36 |
| PPP1R14A | 1 | 1.61 | 1.54 |
| MUC13    | 1 | 1.61 | 1.30 |
| LBH      | 1 | 1.61 | 2.12 |
| ARHGAP23 | 1 | 1.61 | 1.23 |
| GPRC5A   | 1 | 1.60 | 1.21 |
| IGFBP6   | 1 | 1.60 | 1.46 |
| RNASE4   | 1 | 1.60 | 1.73 |
| VAV3     | 1 | 1.60 | 1.96 |
| TGM2     | 1 | 1.60 | 1.10 |
| SLC9A3R1 | 1 | 1.59 | 1.33 |
| C14orf32 | 1 | 1.59 | 1.43 |
| ACOX2    | 1 | 1.59 | 1.62 |
| C1QTNF1  | 1 | 1.59 | 1.94 |
| C4orf31  | 1 | 1.59 | 1.28 |
| C2orf7   | 1 | 1.59 | 1.69 |
| MET      | 1 | 1.58 | 1.48 |
| DOK4     | 1 | 1.58 | 1.30 |
| ANXA8L2  | 1 | 1.58 | 1.60 |
| COX11    | 1 | 1.58 | 1.38 |
| FXVD2    | 1 | 1.58 | 2.08 |
| ATP7A    | 1 | 1.58 | 2.03 |
| C13orf23 | 1 | 1.58 | 1.02 |
| VTN      | 1 | 1.58 | 1.32 |
| ASPH     | 1 | 1.58 | 1.20 |
| PLSCR4   | 1 | 1.58 | 1.76 |
| MAP7D2   | 1 | 1.58 | 0.96 |
| CIRBP    | 1 | 1.58 | 1.43 |
| GXYLT1   | 1 | 1.57 | 0.78 |
| CDH1     | 1 | 1.57 | 1.53 |

|           |   |      |      |
|-----------|---|------|------|
| TSPAN14   | 1 | 1.57 | 1.43 |
| WIPF1     | 1 | 1.57 | 1.30 |
| CBFB      | 1 | 1.56 | 1.38 |
| LOC647947 | 1 | 1.56 | 1.27 |
| AKR1C2    | 1 | 1.56 | 1.06 |
| ELFN2     | 1 | 1.56 | 1.36 |
| BIN1      | 1 | 1.56 | 1.95 |
| BDKRB1    | 1 | 1.56 | 2.02 |
| MGAT2     | 1 | 1.56 | 1.64 |
| SLC39A11  | 1 | 1.56 | 2.03 |
| DCLK1     | 1 | 1.56 | 1.53 |
| DUSP5     | 1 | 1.55 | 1.50 |
| PPIC      | 1 | 1.55 | 1.85 |
| STX1A     | 1 | 1.55 | 1.88 |
| TM4SF4    | 1 | 1.55 | 0.91 |
| CD47      | 1 | 1.55 | 1.29 |
| SLC22A18  | 1 | 1.55 | 2.38 |
| OSBPL10   | 1 | 1.55 | 1.31 |
| FTHL8     | 1 | 1.55 | 1.58 |
| HGD       | 1 | 1.55 | 2.15 |
| TMEM158   | 1 | 1.55 | 1.25 |
| SLIT3     | 1 | 1.54 | 1.79 |
| ST3GAL2   | 1 | 1.54 | 1.49 |
| MYCN      | 1 | 1.54 | 1.83 |
| EPHX1     | 1 | 1.54 | 1.77 |
| SDC4      | 1 | 1.54 | 0.66 |
| SSFA2     | 1 | 1.54 | 0.97 |
| GPD1L     | 1 | 1.54 | 1.20 |
| BCL3      | 1 | 1.54 | 0.95 |
| MRPL35    | 1 | 1.53 | 1.76 |
| GOLSYN    | 1 | 1.53 | 1.41 |
| FSCN1     | 1 | 1.53 | 1.23 |
| SESTD1    | 1 | 1.53 | 1.23 |
| ABCC3     | 1 | 1.53 | 2.44 |
| DLL3      | 1 | 1.53 | 0.93 |
| NUP50     | 1 | 1.53 | 1.07 |
| F8A1      | 1 | 1.53 | 1.23 |
| PDE9A     | 1 | 1.52 | 1.51 |
| C5orf15   | 1 | 1.52 | 1.57 |
| MGC26718  | 1 | 1.52 | 1.42 |
| EGFR      | 1 | 1.52 | 0.97 |
| FAM127A   | 1 | 1.52 | 1.43 |
| PCOLCE2   | 1 | 1.52 | 1.63 |
| ETS2      | 1 | 1.52 | 1.17 |
| DNM2      | 1 | 1.52 | 1.36 |
| STAMBPL1  | 1 | 1.52 | 1.51 |
| C20orf107 | 1 | 1.52 | 1.11 |

|            |   |      |      |
|------------|---|------|------|
| PRCC       | 1 | 1.52 | 1.26 |
| PC         | 1 | 1.52 | 1.77 |
| C21orf63   | 1 | 1.52 | 1.53 |
| FARP1      | 1 | 1.52 | 1.80 |
| SCNN1A     | 1 | 1.51 | 1.61 |
| GABRB3     | 1 | 1.51 | 1.44 |
| SYTL2      | 1 | 1.51 | 1.71 |
| PLOD2      | 1 | 1.51 | 1.79 |
| SKP2       | 1 | 1.51 | 0.96 |
| LEF1       | 1 | 1.51 | 1.13 |
| CTNNA1     | 1 | 1.51 | 1.46 |
| DEPDC7     | 1 | 1.51 | 1.27 |
| LNPEP      | 1 | 1.51 | 1.23 |
| AKR1B15    | 1 | 1.51 | 1.68 |
| VGLL4      | 1 | 1.51 | 1.24 |
| PDZD8      | 1 | 1.50 | 1.60 |
| RAB20      | 1 | 1.50 | 1.30 |
| F3         | 1 | 1.50 | 1.05 |
| NEDD4      | 1 | 1.50 | 1.25 |
| OSTM1      | 1 | 1.50 | 1.31 |
| APLP2      | 1 | 1.50 | 1.37 |
| KIF16B     | 1 | 1.50 | 1.17 |
| TMEM38B    | 1 | 1.50 | 1.68 |
| SELT       | 1 | 1.50 | 1.12 |
| BCAR3      | 1 | 1.50 | 1.71 |
| DPY19L1    | 1 | 1.50 | 3.50 |
| RAB8B      | 1 | 1.50 | 1.63 |
| SLC22A18AS | 1 | 1.49 | 1.88 |
| CA12       | 1 | 1.49 | 1.58 |
| EGLN3      | 1 | 1.49 | 1.60 |
| FMO5       | 1 | 1.48 | 1.57 |
| LOC375295  | 1 | 1.48 | 1.79 |
| FTHL11     | 1 | 1.48 | 1.51 |
| LAD1       | 1 | 1.47 | 1.65 |
| CCL26      | 1 | 1.45 | 1.75 |
| MRPL35     | 1 | 1.45 | 1.89 |
| TSPYL1     | 1 | 1.44 | 1.53 |
| H1FO       | 1 | 1.44 | 1.78 |
| ADAMTS9    | 1 | 1.44 | 1.64 |
| BRMS1L     | 1 | 1.43 | 1.54 |
| LAMA5      | 1 | 1.43 | 1.55 |
| ABCA1      | 1 | 1.43 | 2.18 |
| RAB37      | 1 | 1.43 | 3.73 |
| ENDOD1     | 1 | 1.43 | 1.76 |
| NKX3-1     | 1 | 1.42 | 1.68 |
| RNASE4     | 1 | 1.42 | 1.67 |
| DKK1       | 1 | 1.42 | 1.66 |

|           |   |      |      |
|-----------|---|------|------|
| SMAP1     | 1 | 1.42 | 1.52 |
| TM4SF5    | 1 | 1.42 | 2.42 |
| SERPINB1  | 1 | 1.42 | 1.59 |
| RECK      | 1 | 1.42 | 1.86 |
| CLCF1     | 1 | 1.42 | 1.52 |
| PMEP1A1   | 1 | 1.42 | 1.63 |
| PRSS3     | 1 | 1.42 | 1.60 |
| GRK5      | 1 | 1.41 | 1.66 |
| SLC29A3   | 1 | 1.41 | 1.61 |
| APIP      | 1 | 1.41 | 1.53 |
| RAP1GAP   | 1 | 1.41 | 2.31 |
| GSDMD     | 1 | 1.41 | 1.59 |
| LOC653110 | 1 | 1.40 | 1.73 |
| NEB       | 1 | 1.40 | 1.79 |
| AKR1B10   | 1 | 1.39 | 1.58 |
| MYO18A    | 1 | 1.39 | 1.80 |
| IFI6      | 1 | 1.39 | 2.59 |
| PPIC      | 1 | 1.38 | 1.55 |
| KATNAL1   | 1 | 1.38 | 1.62 |
| ITIH2     | 1 | 1.38 | 1.59 |
| SLC3A1    | 1 | 1.38 | 1.61 |
| AHNAK     | 1 | 1.38 | 1.57 |
| RHOBTB3   | 1 | 1.37 | 1.86 |
| EXT2      | 1 | 1.37 | 1.58 |
| ACTA2     | 1 | 1.37 | 1.72 |
| CYBRD1    | 1 | 1.36 | 1.55 |
| BCAS1     | 1 | 1.36 | 2.71 |
| SNX24     | 1 | 1.36 | 1.56 |
| ITGA2     | 1 | 1.36 | 1.59 |
| AK3L1     | 1 | 1.36 | 2.07 |
| RETSAT    | 1 | 1.35 | 1.51 |
| LOC644799 | 1 | 1.35 | 1.55 |
| GALNT10   | 1 | 1.35 | 1.72 |
| C17orf48  | 1 | 1.35 | 1.60 |
| BIN1      | 1 | 1.34 | 1.82 |
| EHD1      | 1 | 1.33 | 1.56 |
| VIL1      | 1 | 1.33 | 1.62 |
| C14orf78  | 1 | 1.33 | 2.52 |
| PIP5K1C   | 1 | 1.33 | 1.60 |
| RERG      | 1 | 1.33 | 1.50 |
| SGSM1     | 1 | 1.33 | 2.07 |
| FAM81A    | 1 | 1.32 | 1.60 |
| LMNA      | 1 | 1.32 | 1.65 |
| VGLL3     | 1 | 1.31 | 1.76 |
| SERPINA3  | 1 | 1.31 | 1.64 |
| NFIA      | 1 | 1.31 | 1.87 |
| KLHL4     | 1 | 1.30 | 1.55 |

|           |   |      |      |
|-----------|---|------|------|
| F5        | 1 | 1.30 | 1.54 |
| NDRG4     | 1 | 1.30 | 1.56 |
| DDX60     | 1 | 1.30 | 1.53 |
| SEL1L     | 1 | 1.30 | 1.52 |
| PPP1R3C   | 1 | 1.30 | 1.86 |
| LRIG1     | 1 | 1.29 | 1.53 |
| BNIP3L    | 1 | 1.29 | 1.62 |
| DPH3      | 1 | 1.29 | 1.54 |
| FLJ20254  | 1 | 1.29 | 1.50 |
| ALDH3B1   | 1 | 1.28 | 1.88 |
| C20orf100 | 1 | 1.28 | 1.72 |
| TIAF1     | 1 | 1.28 | 1.72 |
| TMED10    | 1 | 1.28 | 2.35 |
| SPATA20   | 1 | 1.27 | 1.64 |
| C19orf33  | 1 | 1.27 | 1.85 |
| EMP1      | 1 | 1.27 | 1.88 |
| OLFML2A   | 1 | 1.27 | 1.62 |
| MTMR11    | 1 | 1.27 | 1.57 |
| SUSD2     | 1 | 1.27 | 2.16 |
| QPCT      | 1 | 1.27 | 1.64 |
| COL18A1   | 1 | 1.27 | 1.65 |
| MAPRE3    | 1 | 1.26 | 1.63 |
| PARP9     | 1 | 1.26 | 1.53 |
| NEU1      | 1 | 1.26 | 1.74 |
| FIBP      | 1 | 1.26 | 1.69 |
| TM4SF19   | 1 | 1.25 | 1.64 |
| PRODH     | 1 | 1.25 | 1.60 |
| SLC46A3   | 1 | 1.25 | 1.85 |
| TSC22D1   | 1 | 1.25 | 1.83 |
| DAB2      | 1 | 1.25 | 1.94 |
| MGLL      | 1 | 1.25 | 1.77 |
| ACYP2     | 1 | 1.24 | 1.59 |
| TBXAS1    | 1 | 1.24 | 2.10 |
| PDZK1     | 1 | 1.24 | 2.08 |
| SLCO2B1   | 1 | 1.24 | 1.74 |
| RIOK3     | 1 | 1.24 | 1.65 |
| MALL      | 1 | 1.23 | 1.93 |
| MLPH      | 1 | 1.23 | 1.65 |
| DKK3      | 1 | 1.22 | 1.77 |
| TSPAN4    | 1 | 1.22 | 1.55 |
| SETBP1    | 1 | 1.22 | 1.55 |
| ANXA9     | 1 | 1.22 | 1.66 |
| PLD5      | 1 | 1.21 | 1.69 |
| FXYD2     | 1 | 1.21 | 1.53 |
| BAIAP2L2  | 1 | 1.21 | 1.70 |
| C14orf149 | 1 | 1.20 | 1.69 |
| PPM1B     | 1 | 1.20 | 1.51 |

|            |   |      |      |
|------------|---|------|------|
| CAST       | 1 | 1.20 | 1.59 |
| RDX        | 1 | 1.20 | 1.62 |
| HIST1H1C   | 1 | 1.19 | 1.96 |
| GFPT2      | 1 | 1.19 | 1.60 |
| ITGAM      | 1 | 1.19 | 1.51 |
| KIAA1539   | 1 | 1.19 | 1.54 |
| ABCG1      | 1 | 1.19 | 1.57 |
| ADCY1      | 1 | 1.18 | 1.52 |
| CNTNAP3    | 1 | 1.17 | 1.54 |
| PPL        | 1 | 1.16 | 1.54 |
| APOH       | 1 | 1.16 | 1.66 |
| C9orf152   | 1 | 1.16 | 1.97 |
| CACNA1G    | 1 | 1.16 | 2.20 |
| COL7A1     | 1 | 1.15 | 2.12 |
| LOC388814  | 1 | 1.15 | 1.56 |
| SLC23A1    | 1 | 1.15 | 1.59 |
| CDCP1      | 1 | 1.15 | 1.64 |
| CDH6       | 1 | 1.15 | 1.55 |
| NAP1L5     | 1 | 1.15 | 1.61 |
| MYO5B      | 1 | 1.15 | 1.59 |
| MB         | 1 | 1.14 | 1.63 |
| LHPP       | 1 | 1.14 | 1.77 |
| RBKS       | 1 | 1.13 | 1.67 |
| CACNG6     | 1 | 1.13 | 1.63 |
| ADORA2B    | 1 | 1.13 | 1.58 |
| BCMO1      | 1 | 1.13 | 1.75 |
| ECHDC2     | 1 | 1.13 | 1.55 |
| MGC4677    | 1 | 1.12 | 1.53 |
| S100A4     | 1 | 1.12 | 1.51 |
| CEACAM1    | 1 | 1.11 | 1.84 |
| KIAA0514   | 1 | 1.11 | 1.84 |
| NAV2       | 1 | 1.11 | 1.57 |
| FAM122B    | 1 | 1.11 | 0.56 |
| MICB       | 1 | 1.10 | 0.58 |
| PCDH7      | 1 | 1.10 | 1.57 |
| AKAP13     | 1 | 1.09 | 1.55 |
| ETFB       | 1 | 1.08 | 1.62 |
| SCARA3     | 1 | 1.08 | 1.90 |
| ABCB6      | 1 | 1.08 | 1.68 |
| TOR1AIP2   | 1 | 1.08 | 0.36 |
| HIST2H2AA3 | 1 | 1.08 | 1.68 |
| PEA15      | 1 | 1.08 | 1.61 |
| C9orf103   | 1 | 1.08 | 1.63 |
| C14orf45   | 1 | 1.08 | 1.57 |
| EIF4EBP2   | 1 | 1.08 | 0.42 |
| LOC730316  | 1 | 1.07 | 0.45 |
| YIPF3      | 1 | 1.07 | 1.51 |

|          |   |      |      |
|----------|---|------|------|
| MYLK     | 1 | 1.07 | 1.54 |
| SVIL     | 1 | 1.07 | 1.53 |
| AP1S2    | 1 | 1.06 | 1.69 |
| POLD4    | 1 | 1.06 | 1.59 |
| C1orf97  | 1 | 1.06 | 1.50 |
| LGALS1   | 1 | 1.05 | 1.81 |
| C3orf52  | 1 | 1.05 | 0.54 |
| ANXA3    | 1 | 1.04 | 1.59 |
| OCRL     | 1 | 1.04 | 0.56 |
| SLC12A2  | 1 | 1.04 | 1.50 |
| TMEM175  | 1 | 1.04 | 1.69 |
| RNPS1    | 1 | 1.03 | 0.59 |
| ODC1     | 1 | 1.03 | 0.54 |
| BTBD10   | 1 | 1.03 | 0.50 |
| SFRP1    | 1 | 1.02 | 1.63 |
| KRCC1    | 1 | 1.02 | 1.61 |
| FBXO10   | 1 | 1.01 | 1.57 |
| RBBP4    | 1 | 1.01 | 0.45 |
| TMEM194  | 1 | 1.01 | 0.50 |
| TMEFF2   | 1 | 1.01 | 1.64 |
| CRTAP    | 1 | 1.00 | 1.62 |
| ACY1     | 1 | 1.00 | 1.66 |
| CYB5R1   | 1 | 1.00 | 1.63 |
| AURKA    | 1 | 1.00 | 0.60 |
| F7       | 1 | 1.00 | 1.53 |
| SPATA7   | 1 | 0.99 | 1.52 |
| C21orf45 | 1 | 0.99 | 0.58 |
| B4GALT6  | 1 | 0.99 | 0.56 |
| CXorf38  | 1 | 0.99 | 0.59 |
| PPP2R5A  | 1 | 0.99 | 0.47 |
| TRIOBP   | 1 | 0.98 | 1.71 |
| SMAD6    | 1 | 0.98 | 1.68 |
| HPGD     | 1 | 0.98 | 1.52 |
| PGM1     | 1 | 0.98 | 0.57 |
| HSPD1    | 1 | 0.97 | 0.53 |
| MMP24    | 1 | 0.97 | 1.62 |
| UBXN2A   | 1 | 0.97 | 0.59 |
| CAPZA1   | 1 | 0.97 | 0.50 |
| ROR1     | 1 | 0.97 | 1.99 |
| PTGES3   | 1 | 0.97 | 0.59 |
| CABC1    | 1 | 0.97 | 0.44 |
| FAM18B2  | 1 | 0.96 | 0.56 |
| UROS     | 1 | 0.96 | 1.65 |
| MXD4     | 1 | 0.96 | 1.72 |
| WISP2    | 1 | 0.96 | 1.53 |
| KIAA0427 | 1 | 0.96 | 1.51 |
| TCN2     | 1 | 0.95 | 1.67 |



|               |   |      |      |
|---------------|---|------|------|
| SHANK2        | 1 | 0.95 | 1.55 |
| UGT2B7        | 1 | 0.95 | 1.54 |
| STRA6         | 1 | 0.94 | 2.01 |
| C6orf85       | 1 | 0.94 | 1.52 |
| NUDT3         | 1 | 0.94 | 0.59 |
| LOC441050     | 1 | 0.93 | 0.51 |
| ANXA13        | 1 | 0.93 | 2.08 |
| CASC4         | 1 | 0.93 | 1.61 |
| LOC648695     | 1 | 0.93 | 0.41 |
| MXRA7         | 1 | 0.92 | 1.60 |
| ARSD          | 1 | 0.92 | 1.70 |
| DNAJC25-GNG10 | 1 | 0.92 | 0.59 |
| NIP7          | 1 | 0.92 | 0.54 |
| HIST1H2BD     | 1 | 0.91 | 1.83 |
| GATS          | 1 | 0.91 | 1.81 |
| ARHGAP19      | 1 | 0.90 | 0.47 |
| CTGF          | 1 | 0.90 | 1.64 |
| GTF2H1        | 1 | 0.90 | 0.56 |
| TAF1A         | 1 | 0.89 | 0.60 |
| SRF           | 1 | 0.89 | 0.55 |
| DICER1        | 1 | 0.89 | 0.58 |
| RCC2          | 1 | 0.89 | 0.50 |
| LOC643300     | 1 | 0.87 | 0.33 |
| TM4SF20       | 1 | 0.87 | 1.93 |
| OTUD6B        | 1 | 0.87 | 0.58 |
| C2orf37       | 1 | 0.86 | 0.56 |
| SERP1         | 1 | 0.86 | 0.59 |
| MKI67IP       | 1 | 0.86 | 0.54 |
| TRNP1         | 1 | 0.85 | 1.54 |
| DCUN1D4       | 1 | 0.85 | 0.58 |
| PEF1          | 1 | 0.85 | 0.54 |
| SAMD5         | 1 | 0.85 | 1.62 |
| GAL           | 1 | 0.85 | 0.55 |
| TNPO1         | 1 | 0.84 | 0.54 |
| NAF1          | 1 | 0.84 | 0.54 |
| KCNJ16        | 1 | 0.83 | 1.86 |
| FAM18B        | 1 | 0.83 | 0.51 |
| WDR40A        | 1 | 0.82 | 0.42 |
| BRIX1         | 1 | 0.81 | 0.59 |
| SPTY2D1       | 1 | 0.81 | 0.59 |
| GNG10         | 1 | 0.81 | 0.46 |
| CLEC2D        | 1 | 0.81 | 0.59 |
| SERPINE1      | 1 | 0.81 | 2.03 |
| HNRNPAB       | 1 | 0.81 | 0.60 |
| LOC642031     | 1 | 0.80 | 0.47 |
| TCEA1         | 1 | 0.79 | 0.59 |
| TUBE1         | 1 | 0.79 | 0.58 |

|           |   |      |      |
|-----------|---|------|------|
| SDHALP1   | 1 | 0.78 | 0.59 |
| SIPA1L2   | 1 | 0.78 | 0.57 |
| RFC3      | 1 | 0.78 | 0.57 |
| TRMT11    | 1 | 0.77 | 0.53 |
| ATF4      | 1 | 0.77 | 0.60 |
| LOC653820 | 1 | 0.77 | 0.52 |
| DNMT3B    | 1 | 0.77 | 0.56 |
| SCO1      | 1 | 0.77 | 0.59 |
| GART      | 1 | 0.77 | 0.58 |
| SLC7A1    | 1 | 0.77 | 0.57 |
| CASP9     | 1 | 0.76 | 0.49 |
| BCAT1     | 1 | 0.76 | 0.49 |
| HSP90AB1  | 1 | 0.75 | 0.56 |
| FEM1A     | 1 | 0.75 | 0.56 |
| C9orf6    | 1 | 0.75 | 0.56 |
| CAPN2     | 1 | 0.75 | 1.70 |
| SLC16A9   | 1 | 0.74 | 0.53 |
| LYAR      | 1 | 0.74 | 0.56 |
| DFFA      | 1 | 0.74 | 0.60 |
| YRDC      | 1 | 0.73 | 0.52 |
| LOC646849 | 1 | 0.73 | 0.42 |
| CD55      | 1 | 0.71 | 0.45 |
| PUS1      | 1 | 0.71 | 0.60 |
| MAK16     | 1 | 0.70 | 0.57 |
| SLC38A1   | 1 | 0.70 | 0.58 |
| YOD1      | 1 | 0.70 | 0.54 |
| KLF4      | 1 | 0.69 | 0.51 |
| EIF4EBP1  | 1 | 0.69 | 0.56 |
| DCP2      | 1 | 0.68 | 0.51 |
| HMOX1     | 1 | 0.68 | 0.57 |
| LOC285216 | 1 | 0.68 | 0.58 |
| HSPA1B    | 1 | 0.68 | 0.50 |
| ALDH1L2   | 1 | 0.67 | 0.50 |
| CRB3      | 1 | 0.67 | 0.60 |
| LOC493869 | 1 | 0.67 | 0.53 |
| CTH       | 1 | 0.67 | 0.47 |
| HIATL1    | 1 | 0.67 | 0.60 |
| MSI2      | 1 | 0.66 | 0.58 |
| TIPARP    | 1 | 0.65 | 0.58 |
| RPS7      | 1 | 0.65 | 0.53 |
| PHF5A     | 1 | 0.65 | 0.58 |
| PHACTR2   | 1 | 0.65 | 0.59 |
| NOLA1     | 1 | 0.64 | 0.58 |
| SYNJ2BP   | 1 | 0.64 | 0.53 |
| MTHFD2    | 1 | 0.64 | 0.40 |
| BMPR2     | 1 | 0.64 | 1.54 |
| MARS      | 1 | 0.64 | 0.58 |

|           |   |      |      |
|-----------|---|------|------|
| CARS      | 1 | 0.64 | 0.50 |
| USP53     | 1 | 0.64 | 0.57 |
| GTF2E1    | 1 | 0.64 | 0.55 |
| C1orf19   | 1 | 0.63 | 0.59 |
| LGSN      | 1 | 0.63 | 0.60 |
| THOC4     | 1 | 0.62 | 0.56 |
| DIO2      | 1 | 0.61 | 0.59 |
| PSMG3     | 1 | 0.61 | 0.58 |
| LOC644762 | 1 | 0.61 | 0.56 |
| PHF17     | 1 | 0.61 | 0.54 |
| ID2       | 1 | 0.61 | 0.60 |
| YARS      | 1 | 0.60 | 0.56 |
| C9orf100S | 1 | 0.60 | 0.84 |
| PSMC3IP   | 1 | 0.60 | 0.66 |
| KCNJ6     | 1 | 0.60 | 1.01 |
| STEAP2    | 1 | 0.60 | 0.78 |
| NOLC1     | 1 | 0.60 | 0.60 |
| TMEM189   | 1 | 0.60 | 1.03 |
| KIF5B     | 1 | 0.60 | 0.86 |
| WTIP      | 1 | 0.60 | 0.77 |
| B3GALT6   | 1 | 0.60 | 1.13 |
| RFXANK    | 1 | 0.60 | 1.02 |
| ZNF189    | 1 | 0.60 | 1.02 |
| TCEAL1    | 1 | 0.60 | 1.10 |
| UBA52     | 1 | 0.60 | 0.76 |
| WDFY1     | 1 | 0.59 | 0.87 |
| FOXO3     | 1 | 0.59 | 0.60 |
| NDUFA10   | 1 | 0.59 | 0.82 |
| BPNT1     | 1 | 0.59 | 0.90 |
| BIRC3     | 1 | 0.59 | 0.58 |
| CNOT8     | 1 | 0.59 | 0.88 |
| HAX1      | 1 | 0.59 | 0.88 |
| MAP1LC3A  | 1 | 0.59 | 0.82 |
| RNGTT     | 1 | 0.59 | 1.00 |
| SNTB1     | 1 | 0.59 | 0.61 |
| CHM       | 1 | 0.59 | 0.88 |
| IGFBP3    | 1 | 0.59 | 0.79 |
| GPT2      | 1 | 0.59 | 0.56 |
| PAWR      | 1 | 0.59 | 0.55 |
| WDR45     | 1 | 0.59 | 0.82 |
| CHAC1     | 1 | 0.59 | 0.58 |
| LOC653147 | 1 | 0.59 | 0.79 |
| PHGDH     | 1 | 0.59 | 0.54 |
| KIT       | 1 | 0.59 | 0.65 |
| FAM83H    | 1 | 0.59 | 0.90 |
| ATF5      | 1 | 0.59 | 0.74 |
| KCTD20    | 1 | 0.59 | 0.73 |

|           |   |      |      |
|-----------|---|------|------|
| C11orf1   | 1 | 0.59 | 0.91 |
| LOC401074 | 1 | 0.59 | 0.66 |
| DDIT3     | 1 | 0.58 | 0.51 |
| TRIM65    | 1 | 0.58 | 0.77 |
| ASB1      | 1 | 0.58 | 0.88 |
| ZBED1     | 1 | 0.58 | 0.89 |
| SLC22A3   | 1 | 0.58 | 1.04 |
| PPP3R1    | 1 | 0.58 | 0.66 |
| RBBP9     | 1 | 0.58 | 0.88 |
| H2AFY     | 1 | 0.58 | 1.08 |
| AGBL5     | 1 | 0.58 | 0.83 |
| C17orf91  | 1 | 0.58 | 0.99 |
| TOP3A     | 1 | 0.58 | 0.89 |
| CYB5D1    | 1 | 0.58 | 0.84 |
| ERMP1     | 1 | 0.58 | 0.96 |
| CRBN      | 1 | 0.58 | 0.76 |
| ID4       | 1 | 0.58 | 0.39 |
| CIAO1     | 1 | 0.58 | 0.91 |
| GNL3L     | 1 | 0.58 | 0.67 |
| CLCN7     | 1 | 0.58 | 0.91 |
| NAT9      | 1 | 0.58 | 0.79 |
| PYCR1     | 1 | 0.57 | 0.66 |
| SLC39A1   | 1 | 0.57 | 0.96 |
| C20orf177 | 1 | 0.57 | 0.65 |
| GARS      | 1 | 0.57 | 0.49 |
| GDAP1     | 1 | 0.57 | 0.57 |
| RRAGB     | 1 | 0.57 | 0.73 |
| GTPBP6    | 1 | 0.57 | 0.87 |
| DNAJB6    | 1 | 0.57 | 0.73 |
| PET112L   | 1 | 0.57 | 0.88 |
| MRPL10    | 1 | 0.57 | 0.77 |
| KRT7      | 1 | 0.57 | 0.94 |
| MMGT1     | 1 | 0.57 | 0.64 |
| TIMM10    | 1 | 0.57 | 0.69 |
| SGK       | 1 | 0.57 | 0.88 |
| LOC283932 | 1 | 0.57 | 0.75 |
| ZNF239    | 1 | 0.57 | 0.73 |
| TMX3      | 1 | 0.57 | 1.06 |
| DUS4L     | 1 | 0.57 | 0.69 |
| SLC6A9    | 1 | 0.57 | 0.56 |
| FKBP14    | 1 | 0.57 | 0.93 |
| LOC649970 | 1 | 0.57 | 0.56 |
| RPL9      | 1 | 0.56 | 0.65 |
| SSBP1     | 1 | 0.56 | 0.94 |
| DIXDC1    | 1 | 0.56 | 0.70 |
| LOC652489 | 1 | 0.56 | 0.88 |
| SEC23B    | 1 | 0.56 | 0.78 |

|           |   |      |      |
|-----------|---|------|------|
| ADAT1     | 1 | 0.56 | 0.95 |
| FAM136A   | 1 | 0.56 | 0.91 |
| FAM129A   | 1 | 0.56 | 0.53 |
| RNF149    | 1 | 0.56 | 0.98 |
| PCK2      | 1 | 0.56 | 0.59 |
| LOC391045 | 1 | 0.56 | 0.54 |
| TRAPPC6B  | 1 | 0.56 | 1.10 |
| LIAS      | 1 | 0.56 | 0.69 |
| TESC      | 1 | 0.56 | 0.75 |
| GABARAPL1 | 1 | 0.56 | 0.82 |
| THBS1     | 1 | 0.56 | 0.77 |
| PGM5      | 1 | 0.56 | 0.96 |
| COQ3      | 1 | 0.56 | 0.72 |
| LARP1     | 1 | 0.56 | 0.80 |
| CBX6      | 1 | 0.56 | 0.73 |
| TDG       | 1 | 0.56 | 0.61 |
| RRM2      | 1 | 0.55 | 0.85 |
| PANK1     | 1 | 0.55 | 0.99 |
| DENND5B   | 1 | 0.55 | 1.29 |
| TRMT2B    | 1 | 0.55 | 0.82 |
| TYSND1    | 1 | 0.55 | 0.71 |
| FAM3C     | 1 | 0.55 | 1.13 |
| REEP3     | 1 | 0.55 | 1.06 |
| ZNF286A   | 1 | 0.55 | 0.80 |
| KLHL12    | 1 | 0.55 | 0.65 |
| CHMP4A    | 1 | 0.55 | 0.75 |
| SUMO2     | 1 | 0.55 | 1.05 |
| ZNF281    | 1 | 0.55 | 0.88 |
| LOC650428 | 1 | 0.55 | 0.59 |
| CTNS      | 1 | 0.55 | 1.01 |
| SLC35A2   | 1 | 0.55 | 0.66 |
| ARL6IP6   | 1 | 0.54 | 0.78 |
| RPL7L1    | 1 | 0.54 | 0.72 |
| LGSN      | 1 | 0.54 | 0.59 |
| FLRT3     | 1 | 0.54 | 0.65 |
| DIRAS3    | 1 | 0.54 | 0.58 |
| SNRPD1    | 1 | 0.54 | 0.83 |
| CHGB      | 1 | 0.54 | 0.62 |
| NUAK2     | 1 | 0.54 | 0.80 |
| LOC554203 | 1 | 0.54 | 0.92 |
| SRGAP1    | 1 | 0.54 | 0.82 |
| TMEM79    | 1 | 0.54 | 0.50 |
| SNAPC5    | 1 | 0.54 | 0.71 |
| STK36     | 1 | 0.54 | 0.93 |
| LOC645236 | 1 | 0.54 | 0.62 |
| B4GALT4   | 1 | 0.53 | 0.96 |
| C1orf24   | 1 | 0.53 | 0.46 |

|           |   |      |      |
|-----------|---|------|------|
| NKIRAS2   | 1 | 0.53 | 0.89 |
| BIRC3     | 1 | 0.53 | 0.61 |
| ULK1      | 1 | 0.53 | 0.60 |
| CCNC      | 1 | 0.53 | 0.78 |
| KRT80     | 1 | 0.53 | 1.85 |
| ULBP1     | 1 | 0.53 | 0.42 |
| C12orf43  | 1 | 0.53 | 0.69 |
| RPL28     | 1 | 0.53 | 0.54 |
| LOC643357 | 1 | 0.53 | 0.88 |
| ATF3      | 1 | 0.53 | 0.54 |
| PDCD2     | 1 | 0.53 | 0.53 |
| CPSF2     | 1 | 0.53 | 0.73 |
| ADPGK     | 1 | 0.53 | 0.88 |
| ATP5S     | 1 | 0.53 | 0.67 |
| BICD2     | 1 | 0.53 | 0.94 |
| PSAT1     | 1 | 0.53 | 0.33 |
| GRPEL2    | 1 | 0.52 | 0.59 |
| RIPK5     | 1 | 0.52 | 0.83 |
| ADM       | 1 | 0.52 | 0.79 |
| TFAP2A    | 1 | 0.52 | 0.72 |
| ID2       | 1 | 0.52 | 0.47 |
| ARL2BP    | 1 | 0.52 | 1.26 |
| C2orf82   | 1 | 0.52 | 0.58 |
| SCRN1     | 1 | 0.51 | 1.05 |
| C17orf97  | 1 | 0.51 | 0.95 |
| ADH1C     | 1 | 0.51 | 0.72 |
| PPAP2A    | 1 | 0.51 | 0.84 |
| ERLIN2    | 1 | 0.51 | 1.11 |
| GADD45B   | 1 | 0.51 | 0.65 |
| ZNF544    | 1 | 0.51 | 0.71 |
| NINJ1     | 1 | 0.51 | 1.00 |
| NPC1      | 1 | 0.51 | 0.76 |
| FBXO18    | 1 | 0.51 | 0.94 |
| EPDR1     | 1 | 0.50 | 0.86 |
| SLC30A9   | 1 | 0.50 | 0.96 |
| DDIT4L    | 1 | 0.50 | 0.56 |
| ADH1A     | 1 | 0.50 | 0.70 |
| RFTN1     | 1 | 0.50 | 0.88 |
| CUTL1     | 1 | 0.49 | 0.78 |
| SLC39A9   | 1 | 0.49 | 0.85 |
| ZMAT3     | 1 | 0.49 | 1.41 |
| ILF3      | 1 | 0.49 | 0.68 |
| SLC1A5    | 1 | 0.49 | 0.55 |
| EIF2S1    | 1 | 0.49 | 0.94 |
| GDF15     | 1 | 0.49 | 0.71 |
| MRPL11    | 1 | 0.49 | 0.87 |
| PGAM5     | 1 | 0.48 | 0.73 |

|           |   |      |      |
|-----------|---|------|------|
| PMM2      | 1 | 0.48 | 0.76 |
| SLC2A14   | 1 | 0.48 | 0.50 |
| ASNS      | 1 | 0.47 | 0.38 |
| LOC644033 | 1 | 0.47 | 0.58 |
| AKIRIN1   | 1 | 0.47 | 0.66 |
| PAFAH1B1  | 1 | 0.47 | 1.27 |
| CBS       | 1 | 0.47 | 0.44 |
| EID3      | 1 | 0.46 | 0.52 |
| BEX2      | 1 | 0.46 | 0.66 |
| NR4A2     | 1 | 0.46 | 0.37 |
| ULK1      | 1 | 0.46 | 0.56 |
| PRTFDC1   | 1 | 0.46 | 1.22 |
| SRXN1     | 1 | 0.46 | 0.62 |
| SAR1A     | 1 | 0.46 | 0.97 |
| SLC2A3    | 1 | 0.45 | 0.35 |
| PPP1R14B  | 1 | 0.45 | 0.93 |
| ARMC1     | 1 | 0.45 | 0.88 |
| UROD      | 1 | 0.45 | 1.29 |
| NECAP1    | 1 | 0.45 | 0.93 |
| TACSTD1   | 1 | 0.44 | 0.33 |
| C14orf126 | 1 | 0.44 | 0.86 |
| S100A10   | 1 | 0.43 | 1.54 |
| BCL2L2    | 1 | 0.43 | 0.70 |
| SLC16A6   | 1 | 0.43 | 1.23 |
| B4GALT7   | 1 | 0.42 | 1.14 |
| NETO2     | 1 | 0.41 | 1.04 |
| IFRD1     | 1 | 0.40 | 0.38 |
| TFPI2     | 1 | 0.40 | 0.79 |
| TERF1     | 1 | 0.40 | 0.78 |
| HORMAD1   | 1 | 0.38 | 0.76 |
| LXN       | 1 | 0.37 | 0.59 |
| H19       | 1 | 0.36 | 0.68 |
| RASD1     | 1 | 0.31 | 0.25 |
| STC2      | 1 | 0.29 | 0.20 |

**Table S6**
